# Supplementary material for: Rhodium-catalyzed 1,4-hydroxyl migration of alkenyl alcohols
Source: Royal Society of Chemistry journal article supplement (doi:10.1039/d4qo01103a), 2024-01-01

## Supporting Information

# Rhodium-Catalyzed 1,4-Hydroxyl Migration of Alkenyl Alcohols

Xue Zhang, Jiang-Min Yan, Jia-Ning Zhang, Si-Qi Xiong, Cheng Liang, Qing-Hua Li,\*  
and Tang-Lin Liu\*

School of Chemistry and Chemical Engineering, Southwest University, Chongqing  
400715, China.

### Table of contents

|                                                                  |           |
|------------------------------------------------------------------|-----------|
| <b>I General information .....</b>                               | <b>2</b>  |
| <b>II General procedure .....</b>                                | <b>2</b>  |
| <b>III Mechanism Studies .....</b>                               | <b>3</b>  |
| <b>IV The analytical and spectral characterization data.....</b> | <b>5</b>  |
| <b>V References .....</b>                                        | <b>25</b> |
| <b>VI NMR spectra .....</b>                                      | <b>26</b> |

## I General information

$^1\text{H}$  NMR and  $^{13}\text{C}$  NMR spectra were recorded on a Bruker Avance 600 MHz and 400 MHz instruments. Chemical shifts were reported in parts per million (ppm), and the residual solvent peak was used as an internal reference: proton (chloroform  $\delta$  7.26), carbon (chloroform  $\delta$  77.0) or tetramethylsilane (TMS  $\delta$  0.00) was used as a reference. Multiplicity was indicated as follows: s (singlet), d (doublet), t (triplet), q (quartet), m (multiplet), dd (doublet of doublet), bs (broad singlet). Coupling constants were reported in Hertz (Hz). All high resolution mass spectra (**HRMS**) were obtained on a Bruker Apex-2. For thin layer chromatography (**TLC**), Qingdao Haiyang Chemical was used, and compounds were visualized with a UV light at 254 nm. Further visualization was achieved by staining with iodine, or potassium permanganate solution followed by heating using a heat gun. Flash chromatography separations were performed on Qingdao Haiyang Chemical 200-300 mesh silica gel. All reactions were carried out under a nitrogen atmosphere. All commercially available reagents were used as received for the reactions without any purification. All solvents were dried on alumina columns using a solvent dispensing system.

## II General procedure

### General procedure for preparation of alkenyl alcohols **1**

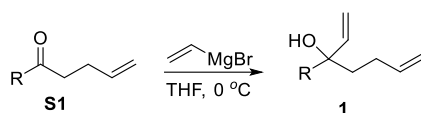

Allylic alcohols were prepared by vinyl-magnesium bromide added to **S1**. To a solution of ketones<sup>1</sup> **S1** (1 mmol) in dry THF was added vinyl-magnesium bromide (1 M in THF, 1.2 equiv.) under nitrogen by a syringe over 5 min at 0 °C. Then, the reaction mixture was allowed to warm to room temperature and stirred for 3 h. The reaction was quenched *via* the addition of saturated aqueous NH<sub>4</sub>Cl at 0 °C, and the mixture was extracted with ethyl acetate. The organic layer was washed with brine and dried over Na<sub>2</sub>SO<sub>4</sub>, filtered, and concentrated in vacuo. The crude product was purified by flash column chromatography on silica gel using EtOAc in hexanes to afford the alkenyl alcohols **1**.

## General procedure for 1,4-migration of hydroxyl groups within the alkenyl alcohols *via* rhodium-catalyzed

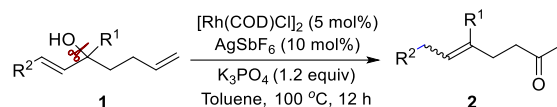

To a vial equipped with a dried stir bar was added alkenyl alcohols **1** (0.1 mmol),  $[\text{Rh}(\text{COD})\text{Cl}]_2$  (5 mol%),  $\text{AgSbF}_6$  (10 mol%),  $\text{K}_3\text{PO}_4$  (1.2 equiv), toluene (0.5 mL) in the glovebox. The reaction mixture was taken outside the glovebox and allowed to stir at 100 °C (oil bath) for 12 h. After cooling to room temperature, the reaction mixture was added to water (10 mL), extracted with EtOAc ( $3 \times 5$  mL). The organic layer was washed with aqueous  $\text{NaHCO}_3$  and brine and dried over  $\text{Na}_2\text{SO}_4$ , filtered, and concentrated in vacuo. And the residue was purified by column chromatography with silica gel to give pure products **2**.

### III Mechanism Studies

#### General Procedure for Scheme 4

#### Radical experiments

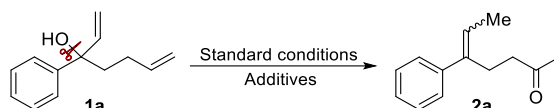

| Entry | Additives | Yield |
|-------|-----------|-------|
| 1     | -         | 78%   |
| 2     | TEMPO     | 70%   |
| 3     | BHT       | 77%   |

Reaction conditions: **1a** (0.1 mmol),  $[\text{Rh}(\text{COD})\text{Cl}]_2$  (5 mol%),  $\text{AgSbF}_6$  (10 mol%),  $\text{K}_3\text{PO}_4$  (1.2 equiv.), additives (1.0 equiv.) Toluene (0.5 mL) at 100 °C for 12 h. The yields are isolated yields.

In a nitrogen glove box, an oven-dried 10 mL reaction tube equipped with a magnetic stirring bar was charged with **1a** (0.1 mmol),  $[\text{Rh}(\text{COD})\text{Cl}]_2$  (5 mol%),  $\text{AgSbF}_6$  (10 mol%),  $\text{K}_3\text{PO}_4$  (1.2 equiv.), additives (1.0 equiv.) and Toluene (0.5 mL). The reaction mixture was sealed with a screw cap, taken out of the glove box and placed in oil-bath at 100 °C and stirred for 12 h. After cooling to room temperature, the reaction mixture was exposed to air, concentrated and further purified by flash column chromatography

over silica (petroleum/ethyl acetate) to give desired product **2a**. The transformation was not suppressed in the presence of 1.0 equiv. of 2,2,6,6-tetramyl-1-piperidoxo (TEMPO) or butylated hydroxytoluene (BHT) under the standard condition, and the target product was obtained with 70% and 77% yield respectively. These radical experiments indicated that the radical process might not involve in this reaction.

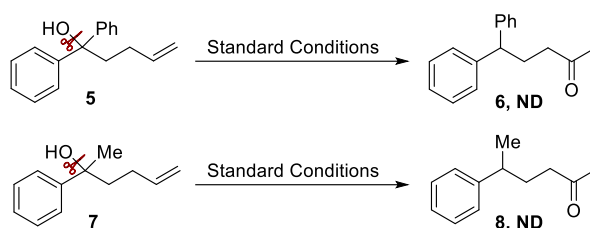

In a nitrogen glove box, an oven-dried 10 mL reaction tube equipped with a magnetic stirring bar was charged with **5** (**7**) (0.1 mmol), [Rh(COD)Cl]<sub>2</sub> (5 mol%), AgSbF<sub>6</sub> (10 mol%), K<sub>3</sub>PO<sub>4</sub> (1.2 equiv.), additives (1.0 equiv.) and Toluene (0.5 mL). The reaction mixture was sealed with a screw cap, taken out of the glove box and placed in oil-bath at 100 °C and stirred for 12 h. After cooling to room temperature, the reaction mixture was exposed to air and no 1,4-hydroxyl migration product was detected.

## IV The analytical and spectral characterization data

### 5-Phenylhept-5-en-2-one (2a)<sup>2</sup>

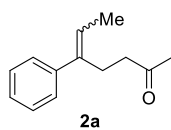

The title compound was prepared according to the general procedure as described, silica gel flash column chromatography was performed using hexanes and ethyl acetate (30:1) ( $R_f = 0.40$  in hexane:ethyl acetate = 15:1) resulting in 14.6 mg of yellow liquid in 78% yield, *E/Z* 60:40.

<sup>1</sup>H NMR (400 MHz, CDCl<sub>3</sub>) (*E*)  $\delta$  7.36-7.30 (m, 3H), 7.25-7.20 (m, 1H), 7.15-7.13 (m, 1H), 5.76 (q,  $J = 6.8$  Hz, 1H), 2.78 (t,  $J = 7.6$  Hz, 2H), 2.46-2.43 (m, 2H), 2.07 (s, 3H), 1.80 (d,  $J = 7.2$  Hz, 3H). (*Z*)  $\delta$  7.36-7.30 (m, 3H), 7.25-7.20 (m, 1H), 7.15-7.13 (m, 1H), 5.58 (q,  $J = 6.8$  Hz, 1H), 2.62 (t,  $J = 7.2$  Hz, 2H), 2.42-2.39 (m, 2H), 2.06 (s, 3H), 1.80 (d,  $J = 6.8$  Hz, 3H).

<sup>13</sup>C NMR (151 MHz, CDCl<sub>3</sub>) (*E*)  $\delta$  208.7, 142.6, 139.5, 128.5, 126.9, 126.8, 122.2, 42.3, 30.1, 23.6, 14.2. (*Z*)  $\delta$  208.6, 140.3, 140.2, 128.7, 128.3, 126.4, 124.0, 42.7, 33.4, 30.1, 14.8.

### 5-(*o*-Tolyl)hept-5-en-2-one (2b)

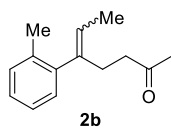

The title compound was prepared according to the general procedure as described, silica gel flash column chromatography was performed using hexanes and ethyl acetate (30:1) ( $R_f = 0.40$  in hexane:ethyl acetate = 10:1) resulting in 13.4 mg of yellow liquid in 66% yield, *E/Z* 45:55.

<sup>1</sup>H NMR (600 MHz, CDCl<sub>3</sub>) (*E*)  $\delta$  7.20-7.10 (m, 3H), 6.96 (d,  $J = 7.8$  Hz, 1H), 5.57 (q,  $J = 6.6$  Hz, 1H), 2.63 (t,  $J = 7.8$  Hz, 2H), 2.55-2.44 (m, 2H), 2.19 (s, 3H), 2.08 (s, 3H), 1.35 (d,  $J = 7.2$  Hz, 3H). (*Z*)  $\delta$  7.20-7.10 (m, 3H), 6.99 (d,  $J = 7.2$  Hz, 1H), 5.36 (q,  $J = 6.6$  Hz, 1H), 2.55-2.44 (m, 2H), 2.36 (t,  $J = 7.8$  Hz, 2H), 2.24 (s, 3H), 2.04 (s, 3H), 1.78 (d,  $J = 6.6$  Hz, 3H).

<sup>13</sup>C NMR (151 MHz, CDCl<sub>3</sub>) (*E*)  $\delta$  208.6, 143.5, 139.7, 135.7, 130.1, 129.0, 126.9, 125.7, 122.3, 42.2, 30.0, 25.4, 19.3, 14.6. (*Z*)  $\delta$  208.5, 140.1, 139.7, 135.6, 130.2, 129.2, 126.8, 125.5, 124.7, 41.7, 33.0, 25.4, 20.0, 13.7.

HRMS(ESI):  $m/z$  Calcd. for C<sub>14</sub>H<sub>18</sub>NaO [M+Na]<sup>+</sup>:225.1250; Found:225.1247.

### 5-(*m*-Tolyl)hept-5-en-2-one (2c)

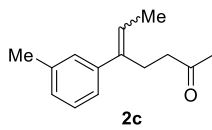

The title compound was prepared according to the general procedure as described, silica gel flash column chromatography was performed using hexanes and ethyl acetate (30:1) ( $R_f = 0.40$  in hexane:ethyl

acetate = 15:1) resulting in 13.0 mg of yellow liquid in 64% yield, *E/Z* 60:40.

$^1\text{H NMR}$  (600 MHz,  $\text{CDCl}_3$ ) (*E*)  $\delta$  7.19 (t,  $J = 7.8$  Hz, 1H), 7.09 (t,  $J = 7.8$  Hz, 2H), 7.05 (t,  $J = 8.4$  Hz, 1H), 5.74 (q,  $J = 6.6$  Hz, 1H), 2.77 (t,  $J = 7.8$  Hz, 2H), 2.45-2.40 (m, 2H), 2.34 (s, 3H), 2.08 (s, 3H), 1.79 (d,  $J = 6.6$  Hz, 3H). (*Z*)  $\delta$  7.22 (t,  $J = 7.8$  Hz, 1H), 7.05 (t,  $J = 8.4$  Hz, 1H), 6.93 (t,  $J = 7.8$  Hz, 2H), 5.55 (q,  $J = 6.6$  Hz, 1H), 2.60 (t,  $J = 7.8$  Hz, 2H), 2.45-2.40 (m, 2H), 2.35 (s, 3H), 2.07 (s, 3H), 1.54 (d,  $J = 7.2$  Hz, 3H).

$^{13}\text{C NMR}$  (101 MHz,  $\text{CDCl}_3$ ) (*E*)  $\delta$  208.7, 142.6, 139.6, 138.0, 128.4, 127.6, 127.2, 123.7, 123.5, 42.4, 30.1, 23.6, 21.6, 14.2. (*Z*)  $\delta$  208.7, 140.3, 140.3, 137.9, 129.3, 128.2, 127.5, 125.8, 122.0, 42.7, 33.4, 30.1, 21.6, 14.8.

HRMS(ESI):  $m/z$  Calcd. for  $\text{C}_{14}\text{H}_{18}\text{NaO}$  [ $\text{M}+\text{Na}$ ] $^+$ :225.1250; Found:225.1249.

### 5-(3-Chlorophenyl)hept-5-en-2-one (2d)

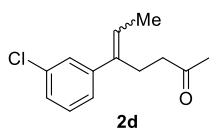

The title compound was prepared according to the general procedure as described, silica gel flash column chromatography was performed using hexanes and ethyl acetate (30:1) ( $R_f = 0.40$  in hexane:ethyl

acetate = 15:1) resulting in 17.1 mg of yellow liquid in 71% yield, *E/Z* 60:40.

$^1\text{H NMR}$  (600 MHz,  $\text{CDCl}_3$ ) (*E*)  $\delta$  7.29-7.27 (m, 1H), 7.24-7.23 (m, 1H), 7.21-7.19 (m, 1H), 7.17-7.15 (d,  $J = 7.2$  Hz, 1H), 5.77 (q,  $J = 6.6$  Hz, 1H), 2.75 (t,  $J = 7.8$  Hz, 2H), 2.44-2.40 (m, 2H), 2.09 (s, 3H), 1.80 (d,  $J = 6.6$  Hz, 3H). (*Z*)  $\delta$  7.29-7.27 (m, 1H), 7.24-7.23 (m, 1H), 7.13-7.12 (m, 1H), 7.02 (d,  $J = 7.2$  Hz, 1H), 5.60 (q,  $J = 7.2$  Hz, 1H), 2.59 (t,  $J = 7.8$  Hz, 2H), 2.44-2.40 (m, 2H), 2.08 (s, 3H), 1.54 (d,  $J = 7.2$  Hz, 3H).

$^{13}\text{C NMR}$  (151 MHz,  $\text{CDCl}_3$ ) (*E*)  $\delta$  208.3, 144.5, 138.4, 134.4, 129.7, 128.7, 126.9, 125.3, 124.5, 42.2, 30.1, 23.4, 14.3. (*Z*)  $\delta$  208.4, 142.3, 139.0, 134.2, 129.7, 127.0, 126.9, 126.6, 123.2, 42.5, 33.0, 30.1, 14.8.

HRMS(ESI):  $m/z$  Calcd. for  $\text{C}_{13}\text{H}_{15}\text{ClNaO}$  [ $\text{M}+\text{Na}$ ] $^+$ :245.0704; Found:245.0704.

### 5-(*p*-Tolyl)hept-5-en-2-one (2e)

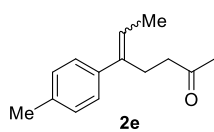

The title compound was prepared according to the general procedure as described, silica gel flash column chromatography was performed using hexanes and ethyl acetate (30:1) ( $R_f = 0.40$  in hexane:ethyl acetate = 15:1) resulting in 11.8 mg of yellow liquid in 54% yield, *E/Z* 60:40.

$^1\text{H NMR}$  (400 MHz,  $\text{CDCl}_3$ ) (*E*)  $\delta$  7.20-7.16 (m, 3H), 7.04-7.02 (m, 1H), 5.73 (q,  $J = 6.8$  Hz, 1H), 2.78-2.74 (m, 2H), 2.45-2.42 (m, 2H), 2.33 (s, 3H), 2.07 (s, 3H), 1.79 (d,  $J = 6.8$  Hz, 3H). (*Z*)  $\delta$  7.14-7.10 (m, 3H), 7.04-7.02 (m, 1H), 5.73 (q,  $J = 6.8$  Hz, 1H), 2.62-2.58 (m, 2H), 2.41-2.38 (m, 2H), 2.35 (s, 3H), 2.06 (s, 3H), 1.55 (d,  $J = 6.8$  Hz, 3H).

$^{13}\text{C NMR}$  (151 MHz,  $\text{CDCl}_3$ ) (*E*)  $\delta$  208.7, 139.6, 139.2, 136.5, 129.2, 126.2, 123.2, 42.4, 30.1, 23.5, 21.2, 14.2. (*Z*)  $\delta$  208.8, 140.1, 137.2, 136.4, 129.0, 128.6, 121.9, 42.7, 33.4, 30.1, 21.3, 14.8.

**HRMS(ESI):**  $m/z$  Calcd. for  $\text{C}_{14}\text{H}_{18}\text{NaO}$  [ $\text{M}+\text{Na}$ ] $^+$ :225.1250; Found:225.1249.

### 5-(4-(Methylthio)phenyl)hept-5-en-2-one (2f)

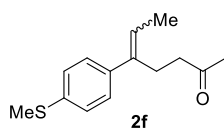

The title compound was prepared according to the general procedure as described, silica gel flash column chromatography was performed using hexanes and ethyl acetate (30:1) ( $R_f = 0.40$  in hexane:ethyl acetate = 10:1) resulting in 11.5 mg of yellow liquid in 49% yield, *E/Z* 60:40.

$^1\text{H NMR}$  (600 MHz,  $\text{CDCl}_3$ ) (*E*)  $\delta$  7.24-7.19 (m, 3H), 7.07 (d,  $J = 8.4$  Hz, 1H), 5.75 (q,  $J = 6.6$  Hz, 1H), 2.76 (t,  $J = 7.8$  Hz, 2H), 2.48 (s, 3H), 2.45-2.39 (m, 2H), 2.08 (s, 3H), 1.79 (d,  $J = 7.2$  Hz, 3H). (*Z*)  $\delta$  7.24-7.19 (m, 4H), 5.57 (q,  $J = 7.2$  Hz, 1H), 2.60 (t,  $J = 7.2$  Hz, 2H), 2.50 (s, 3H), 2.45-2.39 (m, 2H), 2.06 (s, 3H), 1.56 (d,  $J = 6.6$  Hz, 3H).

$^{13}\text{C NMR}$  (151 MHz,  $\text{CDCl}_3$ ) (*E*)  $\delta$  208.4, 139.3, 136.6, 129.0, 126.7, 126.4, 123.5, 42.2, 30.0, 23.2, 16.0, 14.1. (*Z*)  $\delta$  208.5, 139.4, 138.6, 136.6, 126.7, 126.5, 122.3, 42.5, 33.1,

29.9, 15.9, 14.7.

HRMS(ESI):  $m/z$  Calcd. for  $C_{14}H_{18}NaOS$   $[M+Na]^+$ :257.0971; Found:257.0971.

### 5-(4-(Tert-butyl)phenyl)hept-5-en-2-one (2g)

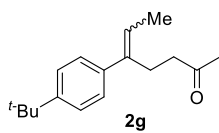

The title compound was prepared according to the general procedure as described, silica gel flash column chromatography was performed using hexanes and ethyl acetate (30:1) ( $R_f = 0.40$  in hexane:ethyl acetate = 15:1) resulting in 13.8 mg of yellow liquid in 58% yield, *E/Z* 70:30.

$^1H$  NMR (600 MHz,  $CDCl_3$ ) (*E*)  $\delta$  7.32 (d,  $J = 8.4$  Hz, 2H), 7.24-7.23 (m, 2H), 5.76 (q,  $J = 6.6$  Hz, 1H), 2.77 (t,  $J = 7.8$  Hz, 2H), 2.47-2.41 (m, 2H), 2.08 (s, 3H), 1.79 (d,  $J = 7.2$  Hz, 3H), 1.32 (s, 9H). (*Z*)  $\delta$  7.34 (d,  $J = 7.8$  Hz, 2H), 7.07-7.02 (m, 2H), 5.55 (q,  $J = 7.2$  Hz, 1H), 2.61 (t,  $J = 7.8$  Hz, 2H), 2.47-2.41 (m, 2H), 2.06 (s, 3H), 1.57 (d,  $J = 6.6$  Hz, 3H), 1.33 (s, 9H).

$^{13}C$  NMR (151 MHz,  $CDCl_3$ ) (*E*)  $\delta$  208.8, 149.8, 139.4, 128.3, 125.9, 125.1, 123.2, 42.5, 34.6, 31.5, 30.1, 23.5, 14.2. (*Z*)  $\delta$  209.0, 149.5, 139.0, 127.9, 125.4, 125.2, 121.9, 42.8, 34.6, 33.4, 31.5, 30.1, 14.9.

HRMS(ESI):  $m/z$  Calcd. for  $C_{17}H_{24}NaO$   $[M+Na]^+$ :267.1719; Found:267.1720.

### 5-(4-Methoxyphenyl)hept-5-en-2-one (2h)<sup>3</sup>

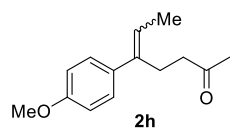

The title compound was prepared according to the general procedure as described, silica gel flash column chromatography was performed using hexanes and ethyl acetate (30:1) ( $R_f = 0.40$  in hexane:ethyl acetate = 15:1) resulting in 13.8 mg of yellow liquid in 58% yield, *E/Z* 70:30.

$^1H$  NMR (600 MHz,  $CDCl_3$ ) (*E*)  $\delta$  7.24-7.22 (m, 2H), 6.85-6.83 (m, 2H), 5.69 (q,  $J = 7.2$  Hz, 1H), 3.80 (s, 3H), 2.75 (t,  $J = 7.8$  Hz, 2H), 2.45-2.42 (m, 2H), 2.07 (s, 3H), 1.78 (d,  $J = 6.6$  Hz, 3H). (*Z*)  $\delta$  7.08-7.06 (m, 2H), 6.89-6.87 (m, 2H), 5.54 (q,  $J = 7.2$  Hz, 1H), 3.82 (s, 3H), 2.59 (t,  $J = 7.8$  Hz, 2H), 2.42-2.39 (m, 2H), 2.06 (s, 3H), 1.78 (d,  $J =$



7.2 Hz, 3H).

$^{13}\text{C}$  NMR (151 MHz,  $\text{CDCl}_3$ ) (*E*)  $\delta$  208.7, 158.7, 138.8, 132.4, 127.4, 113.8, 113.7, 55.4, 42.4, 30.1, 23.6, 14.2. (*Z*)  $\delta$  208.7, 158.4, 139.7, 135.0, 129.8, 122.5, 121.9, 55.4, 42.8, 33.5, 30.1, 14.8.

HRMS(ESI):  $m/z$  Calcd. for  $\text{C}_{14}\text{H}_{19}\text{O}_2$   $[\text{M}+\text{H}]^+$ :219.1380; Found:219.1380.

### 5-(4-Fluorophenyl)hept-5-en-2-one (2i)

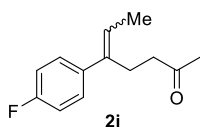

The title compound was prepared according to the general procedure as described, silica gel flash column chromatography was performed using hexanes and ethyl acetate (30:1) ( $R_f = 0.40$  in hexane:ethyl acetate = 15:1) resulting in 11.7 mg of yellow liquid in 57% yield, *E/Z* 60:40.

$^1\text{H}$  NMR (600 MHz,  $\text{CDCl}_3$ ) (*E*)  $\delta$  7.26-7.23 (m, 2H), 7.00-6.96 (m, 2H), 5.70 (q,  $J = 7.2$  Hz, 1H), 2.75 (t,  $J = 7.8$  Hz, 2H), 2.43-2.42 (m, 2H), 2.08 (s, 3H), 1.79 (d,  $J = 7.2$  Hz, 3H). (*Z*)  $\delta$  7.11-7.09 (m, 2H), 7.04-7.01 (m, 2H), 5.58 (q,  $J = 6.6$  Hz, 1H), 2.59 (t,  $J = 7.8$  Hz, 2H), 2.41-2.39 (m, 2H), 2.07 (s, 3H), 1.53 (d,  $J = 7.2$  Hz, 3H).

$^{13}\text{C}$  NMR (151 MHz,  $\text{CDCl}_3$ ) (*E*)  $\delta$  208.4, 162.0 (d,  $J = 246.1$  Hz), 138.6 (d,  $J = 4.5$  Hz), 138.5, 127.9 (d,  $J = 7.6$  Hz), 124.0, 115.3 (d,  $J = 21.1$  Hz), 42.2, 30.1, 23.7, 14.2. (*Z*)  $\delta$  208.5, 161.8 (d,  $J = 246.1$  Hz), 139.2, 138.6 (d,  $J = 4.5$  Hz), 130.2 (d,  $J = 7.6$  Hz), 122.6, 115.2 (d,  $J = 21.1$  Hz), 42.5, 33.3, 30.1, 14.7.

$^{19}\text{F}$  NMR (565 MHz,  $\text{CDCl}_3$ ) (*E*)  $\delta$  -116.30. (*Z*)  $\delta$  -115.94.

HRMS(ESI):  $m/z$  Calcd. for  $\text{C}_{13}\text{H}_{15}\text{FNaO}$   $[\text{M}+\text{Na}]^+$ :229.0999; Found:229.1000.

### 5-(4-(Trifluoromethyl)phenyl)hept-5-en-2-one (2j)

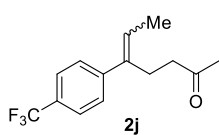

The title compound was prepared according to the general procedure as described, silica gel flash column chromatography was performed using hexanes and ethyl acetate (30:1) ( $R_f = 0.40$  in hexane:ethyl acetate = 15:1) resulting in 16.1 mg of yellow liquid in 63% yield, *E/Z*

60:40.

$^1\text{H}$  NMR (600 MHz,  $\text{CDCl}_3$ ) (*E*)  $\delta$  7.55 (d,  $J = 7.8$  Hz, 2H), 7.39 (d,  $J = 7.8$  Hz, 2H),

5.84 (q,  $J = 7.2$  Hz, 1H), 2.80 (t,  $J = 7.8$  Hz, 2H), 2.44-2.43 (m, 2H), 2.08 (s, 3H), 1.83 (d,  $J = 7.2$  Hz, 3H). (*Z*)  $\delta$  7.60 (d,  $J = 8.4$  Hz, 2H), 7.39 (d,  $J = 7.8$  Hz, 2H), 5.64 (q,  $J = 7.2$  Hz, 1H), 2.63 (t,  $J = 7.8$  Hz, 2H), 2.42-2.40 (m, 2H), 2.08 (s, 3H), 1.54 (d,  $J = 7.2$  Hz, 3H).

$^{13}\text{C}$  NMR (151 MHz,  $\text{CDCl}_3$ ) (*E*)  $\delta$  208.1, 146.2, 138.5, 128.9 (q,  $J = 31.9$  Hz), 126.6, 126.1, 125.5 (q,  $J = 3.6$  Hz), 124.4 (q,  $J = 275.4$  Hz), 42.1, 30.1, 23.3, 14.3. (*Z*)  $\delta$  208.2, 144.3, 139.1, 129.1 (q,  $J = 32.5$  Hz), 126.6, 126.1, 125.3 (q,  $J = 3.8$  Hz), 124.4 (q,  $J = 275.4$  Hz), 42.4, 32.9, 30.1, 14.8.

$^{19}\text{F}$  NMR (565 MHz,  $\text{CDCl}_3$ ) (*E*)  $\delta$  -62.39. (*Z*)  $\delta$  -62.44.

HRMS(ESI):  $m/z$  Calcd. for  $\text{C}_{14}\text{H}_{15}\text{F}_3\text{NaO}$   $[\text{M}+\text{Na}]^+$ :279.0967; Found:279.0968.

#### 5-(4-Chlorophenyl)hept-5-en-2-one (2k)

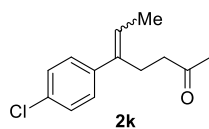

The title compound was prepared according to the general procedure as described, silica gel flash column chromatography was performed using hexanes and ethyl acetate (30:1) ( $R_f = 0.40$  in hexane:ethyl acetate = 15:1) resulting in 14.4 mg of yellow liquid in 65% yield, *E/Z* 60:40.

$^1\text{H}$  NMR (600 MHz,  $\text{CDCl}_3$ ) (*E*)  $\delta$  7.32-7.30 (m, 1H), 7.22-7.21 (m, 2H), 7.08-7.07 (m, 1H), 5.75 (q,  $J = 7.2$  Hz, 1H), 2.75 (t,  $J = 7.8$  Hz, 2H), 2.43-2.41 (m, 2H), 2.08 (s, 3H), 1.80 (d,  $J = 7.2$  Hz, 3H). (*Z*)  $\delta$  7.27-7.26 (m, 1H), 7.22-7.21 (m, 2H), 7.08-7.07 (m, 1H), 5.59 (q,  $J = 6.6$  Hz, 1H), 2.59 (t,  $J = 7.8$  Hz, 2H), 2.41-2.39 (m, 2H), 2.07 (s, 3H), 1.53 (d,  $J = 7.2$  Hz, 3H).

$^{13}\text{C}$  NMR (151 MHz,  $\text{CDCl}_3$ ) (*E*)  $\delta$  208.3, 141.0, 138.4, 130.1, 128.6, 127.7, 124.6, 42.2, 30.1, 23.4, 14.2. (*Z*)  $\delta$  208.4, 139.1, 138.7, 132.6, 128.6, 127.7, 122.9, 42.5, 33.1, 30.1, 14.8.

HRMS(ESI):  $m/z$  Calcd. for  $\text{C}_{13}\text{H}_{15}\text{ClNaO}$   $[\text{M}+\text{Na}]^+$ :245.0704; Found:245.0703.

#### 5-(4-Bromophenyl)hept-5-en-2-one (2l)<sup>3</sup>

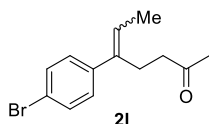

The title compound was prepared according to the general procedure as described, silica gel flash column chromatography was performed

using hexanes and ethyl acetate (30:1) ( $R_f = 0.40$  in hexane:ethyl acetate = 15:1) resulting in 11.4 mg of yellow liquid in 43% yield, *E/Z* 70:30.

$^1\text{H}$  NMR (600 MHz,  $\text{CDCl}_3$ ) (*E*)  $\delta$  7.43-7.41 (m, 2H), 7.17-7.15 (m, 2H), 5.75 (q,  $J = 7.2$  Hz, 1H), 2.75 (t,  $J = 7.8$  Hz, 2H), 2.43-2.39 (m, 2H), 2.08 (s, 3H), 1.79 (d,  $J = 7.2$  Hz, 3H). (*Z*)  $\delta$  7.47-7.46 (m, 2H), 7.02-7.01 (m, 2H), 5.59 (q,  $J = 6.6$  Hz, 1H), 2.59 (t,  $J = 7.8$  Hz, 2H), 2.43-2.39 (m, 2H), 2.07 (s, 3H), 1.53 (d,  $J = 6.6$  Hz, 3H).

$^{13}\text{C}$  NMR (151 MHz,  $\text{CDCl}_3$ ) (*E*)  $\delta$  208.3, 141.5, 138.5, 131.5, 128.1, 124.7, 120.7, 42.2, 30.1, 23.4, 14.3. (*Z*)  $\delta$  208.3, 139.2, 139.1, 131.6, 130.4, 122.9, 120.7, 42.5, 33.1, 29.8, 14.8.

### 5-([1,1'-Biphenyl]-4-yl)hept-5-en-2-one (2m)

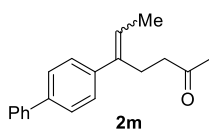

The title compound was prepared according to the general procedure as described, silica gel flash column chromatography was performed using hexanes and ethyl acetate (30:1) ( $R_f = 0.40$  in hexane:ethyl

acetate = 15:1) resulting in 20.3 mg of yellow liquid in 77% yield, *E/Z* 60:40.

$^1\text{H}$  NMR (600 MHz,  $\text{CDCl}_3$ ) (*E*)  $\delta$  7.62-7.57 (m, 5H), 7.54 (d,  $J = 8.4$  Hz, 2H), 7.35-7.34 (m, 1H), 7.22 (d,  $J = 7.2$  Hz, 1H), 5.84 (q,  $J = 6.6$  Hz, 1H), 2.82 (t,  $J = 7.8$  Hz, 2H), 2.50-2.47 (m, 2H), 2.09 (s, 3H), 1.83 (d,  $J = 6.6$  Hz, 3H). (*Z*)  $\delta$  7.45-7.42 (m, 5H), 7.38 (d,  $J = 7.8$  Hz, 2H), 7.34-7.33 (m, 1H), 7.22 (d,  $J = 7.2$  Hz, 1H), 5.61 (q,  $J = 7.2$  Hz, 1H), 2.66 (t,  $J = 7.8$  Hz, 2H), 2.47-2.44 (m, 2H), 2.08 (s, 3H), 1.61 (d,  $J = 7.2$  Hz, 3H).

$^{13}\text{C}$  NMR (151 MHz,  $\text{CDCl}_3$ ) (*E*)  $\delta$  208.6, 141.4, 140.9, 139.8, 139.0, 128.9, 127.3, 127.2, 127.1, 126.7, 124.0, 42.4, 30.2, 23.4, 14.9. (*Z*)  $\delta$  208.7, 141.0, 139.7, 139.6, 139.3, 129.1, 127.4, 127.1, 127.0, 126.7, 122.5, 42.7, 33.3, 30.1, 14.3.

HRMS(ESI):  $m/z$  Calcd. for  $\text{C}_{19}\text{H}_{20}\text{NaO}$   $[\text{M}+\text{Na}]^+$ :287.1406; Found:287.1402.

### 5-(3,5-dimethoxyphenyl)hept-5-en-2-one (2n)

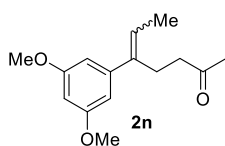

The title compound was prepared according to the general procedure as described, silica gel flash column chromatography was performed using hexanes and ethyl acetate (30:1) ( $R_f = 0.40$  in

hexane:ethyl acetate = 15:1) resulting in 16.1 mg of yellow liquid in 65% yield, *E/Z* 60:40.

<sup>1</sup>H NMR (600 MHz, CDCl<sub>3</sub>) (*E*) δ 6.45-6.44 (m, 2H), 6.37-6.36 (m, 1H), 5.77 (q, *J* = 7.2 Hz, 1H), 3.79 (s, 6H), 2.74 (t, *J* = 7.8 Hz, 2H), 2.46-2.42 (m, 2H), 2.08 (s, 3H), 1.79 (d, *J* = 6.6 Hz, 3H). (*Z*) δ 6.37-6.36 (m, 1H), 6.29-6.28 (m, 2H), 5.54 (q, *J* = 7.2 Hz, 1H), 3.79 (s, 6H), 2.58 (t, *J* = 7.8 Hz, 2H), 2.46-2.42 (m, 2H), 2.07 (s, 3H), 1.56 (d, *J* = 6.6 Hz, 3H).

<sup>13</sup>C NMR (151 MHz, CDCl<sub>3</sub>) (*E*) δ 208.6, 160.8, 145.0, 139.5, 124.1, 104.8, 98.8, 55.4, 42.3, 30.1, 23.6, 14.1. (*Z*) δ 208.7, 160.7, 142.5, 140.2, 122.3, 106.8, 98.7, 55.4, 42.6, 33.2, 30.1, 14.8.

HRMS(ESI): *m/z* Calcd. for C<sub>15</sub>H<sub>20</sub>NaO<sub>3</sub> [M+Na]<sup>+</sup>:271.1305; Found:271.1304.

#### 5-(Naphthalen-2-yl)hept-5-en-2-one (2o)

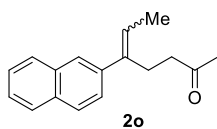

The title compound was prepared according to the general procedure as described, silica gel flash column chromatography was performed using hexanes and ethyl acetate (30:1) (*R<sub>f</sub>* = 0.40 in

hexane:ethyl acetate = 15:1) resulting in 16.5 mg of yellow liquid in 69% yield, *E/Z* 60:40.

<sup>1</sup>H NMR (600 MHz, CDCl<sub>3</sub>) (*E*) δ 7.85-7.80 (m, 3H), 7.71 (s, 1H), 7.49-7.46 (m, 2H), 7.29-7.28 (m, 1H), 5.92 (q, *J* = 6.6 Hz, 1H), 2.89 (t, *J* = 7.8 Hz, 2H), 2.12 (t, *J* = 7.8 Hz, 2H), 2.06 (s, 3H), 1.86 (d, *J* = 6.6 Hz, 3H). (*Z*) δ 7.79-7.77 (m, 3H), 7.59 (s, 1H), 7.45-7.43 (m, 2H), 7.29-7.28 (m, 1H), 5.67 (q, *J* = 7.2 Hz, 1H), 2.71 (t, *J* = 7.8 Hz, 2H), 2.43 (t, *J* = 7.8 Hz, 2H), 2.04 (s, 3H), 1.60 (d, *J* = 7.2 Hz, 3H).

<sup>13</sup>C NMR (151 MHz, CDCl<sub>3</sub>) (*E*) δ 208.6, 139.8, 139.4, 133.6, 132.6, 128.1, 127.9, 127.6, 127.1, 126.3, 125.7, 125.1, 124.6, 42.4, 30.1, 23.5, 14.4. (*Z*) δ 208.6, 140.1, 137.8, 133.5, 132.4, 128.0, 127.9, 127.8, 127.3, 126.2, 125.8, 124.6, 122.7, 42.7, 33.3, 30.1, 14.9.

HRMS(ESI): *m/z* Calcd. for C<sub>17</sub>H<sub>18</sub>NaO [M+Na]<sup>+</sup>:261.1250; Found:261.1250.

### 5-(Naphthalen-1-yl)hept-5-en-2-one (2p)

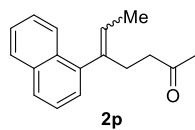

The title compound was prepared according to the general procedure as described, silica gel flash column chromatography was performed using hexanes and ethyl acetate (30:1) ( $R_f = 0.40$  in hexane:ethyl

acetate = 15:1) resulting in 13.3 mg of yellow liquid in 56% yield, *E/Z* 45:55.

$^1\text{H NMR}$  (600 MHz,  $\text{CDCl}_3$ ) (*E*)  $\delta$  7.93-7.92 (m, 1H), 7.87-7.85 (m, 1H), 7.78-7.74 (m, 1H), 7.48-7.45 (m, 2H), 7.41 (t,  $J = 7.8$  Hz, 1H), 7.21-7.19 (m, 1H), 5.84 (q,  $J = 6.6$  Hz, 1H), 2.74-2.65 (m, 2H), 2.50-2.42 (m, 2H), 2.02 (s, 3H), 1.33 (d,  $J = 6.6$  Hz, 3H). (*Z*)  $\delta$  7.85-7.82 (m, 2H), 7.78-7.74 (m, 1H), 7.48-7.45 (m, 2H), 7.41 (t,  $J = 7.8$  Hz, 1H), 7.21-7.19 (m, 1H), 5.58 (q,  $J = 6.6$  Hz, 1H), 2.82 (t,  $J = 7.8$  Hz, 2H), 2.37 (t,  $J = 7.8$  Hz, 2H), 1.98 (s, 3H), 1.90 (d,  $J = 6.6$  Hz, 3H).

$^{13}\text{C NMR}$  (151 MHz,  $\text{CDCl}_3$ ) (*E*)  $\delta$  208.5, 141.9, 138.5, 133.9, 132.0, 128.4, 127.2, 126.3, 125.9, 125.9, 125.8, 125.6, 125.4, 42.4, 30.0, 26.3, 14.9. (*Z*)  $\delta$  208.5, 141.9, 138.6, 133.8, 131.5, 128.5, 127.2, 126.1, 126.0, 125.9, 125.9, 125.7, 124.2, 42.0, 33.8, 30.0, 13.9.

HRMS(ESI):  $m/z$  Calcd. for  $\text{C}_{17}\text{H}_{18}\text{NaO}$  [ $\text{M}+\text{Na}$ ] $^+$ :261.1250; Found:261.1250.

### 5-(Thiophen-2-yl)hept-5-en-2-one (2q)

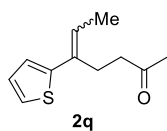

The title compound was prepared according to the general procedure as described, silica gel flash column chromatography was performed using hexanes and ethyl acetate (30:1) ( $R_f = 0.40$  in hexane:ethyl acetate =

15:1) resulting in 8.1 mg of yellow liquid in 42% yield, *E/Z* 55:45.

$^1\text{H NMR}$  (600 MHz,  $\text{CDCl}_3$ ) (*E*)  $\delta$  7.10-7.09 (m, 1H), 6.96-6.94 (m, 1H), 6.91-6.90 (m, 1H), 5.98 (q,  $J = 7.2$  Hz, 1H), 2.75 (t,  $J = 7.8$  Hz, 2H), 2.59 (t,  $J = 7.8$  Hz, 2H), 2.13 (s, 3H), 1.80-1.78 (m, 3H). (*Z*)  $\delta$  7.28-7.27 (m, 1H), 7.04-7.02 (m, 1H), 6.93-6.92 (m, 1H), 5.67 (q,  $J = 7.2$  Hz, 1H), 2.67 (t,  $J = 7.2$  Hz, 2H), 2.55 (t,  $J = 7.2$  Hz, 2H), 2.10 (s, 3H), 1.80-1.78 (m, 3H).

$^{13}\text{C NMR}$  (151 MHz,  $\text{CDCl}_3$ ) (*E*)  $\delta$  208.4, 146.5, 133.3, 127.4, 124.5, 123.3, 122.1, 42.6, 30.2, 24.1, 14.0. (*Z*)  $\delta$  208.5, 141.8, 132.8, 126.9, 125.9, 124.6, 123.1, 43.1, 33.9, 30.2,

15.4.

HRMS(ESI):  $m/z$  Calcd. for  $C_{11}H_{14}NaOS$   $[M+Na]^+$ :217.0658; Found:217.0657.

### 5-(furan-2-yl)hept-5-en-2-one (2r)

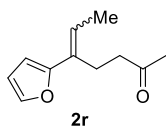

The title compound was prepared according to the general procedure as described, silica gel flash column chromatography was performed using hexanes and ethyl acetate (30:1) ( $R_f$  = 0.40 in hexane:ethyl acetate =

15:1) resulting in 8.2 mg of yellow liquid in 46% yield,  $E/Z$  60:40.

$^1H$  NMR (600 MHz,  $CDCl_3$ ) ( $E$ )  $\delta$  7.31 (s, 1H), 6.36-6.35 (m, 1H), 6.17-6.16 (m, 1H), 6.13 (q,  $J$  = 7.2 Hz, 1H), 2.66-2.58 (m, 4H), 2.14 (s, 3H), 1.79 (d,  $J$  = 7.2 Hz, 3H). ( $Z$ )  $\delta$  7.40 (s, 1H), 6.42-6.41 (m, 1H), 6.29-6.28 (m, 1H), 5.59 (q,  $J$  = 7.2 Hz, 1H), 2.66-2.58 (m, 4H), 2.12 (s, 3H), 1.89 (d,  $J$  = 7.2 Hz, 3H).

$^{13}C$  NMR (151 MHz,  $CDCl_3$ ) ( $E$ )  $\delta$  208.5, 155.2, 141.4, 129.3, 121.2, 111.1, 104.3, 43.0, 30.2, 21.9, 15.4. ( $Z$ )  $\delta$  208.7, 153.6, 141.2, 129.1, 123.8, 110.9, 108.7, 43.7, 30.1, 21.9, 13.4.

HRMS(ESI):  $m/z$  Calcd. for  $C_{11}H_{14}NaO_2$   $[M+Na]^+$ :201.0886; Found:201.0887.

### 5-Benzylhept-5-en-2-one (2s)

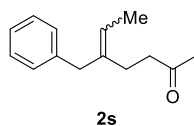

The title compound was prepared according to the general procedure as described, silica gel flash column chromatography was performed using hexanes and ethyl acetate (30:1) ( $R_f$  = 0.40 in hexane:ethyl

acetate = 15:1) resulting in 17.2 mg of yellow liquid in 85% yield,  $E/Z$  50:50.

$^1H$  NMR (400 MHz,  $CDCl_3$ ) ( $E$ )  $\delta$  7.29-7.14 (m, 5H), 5.42 (q,  $J$  = 6.8 Hz, 1H), 3.40 (s, 2H), 2.48-2.44 (m, 2H), 2.27-2.19 (m, 2H), 2.05 (s, 3H), 1.72 (d,  $J$  = 6.8 Hz, 3H). ( $Z$ )  $\delta$  7.29-7.14 (m, 5H), 5.32 (q,  $J$  = 6.8 Hz, 1H), 3.29 (s, 2H), 2.41-2.37 (m, 2H), 2.27-2.19 (m, 2H), 2.07 (s, 3H), 1.63 (d,  $J$  = 6.8 Hz, 3H).

$^{13}C$  NMR (151 MHz,  $CDCl_3$ ) ( $E$ )  $\delta$  208.8, 140.0, 137.2, 128.6, 128.5, 126.1, 121.0, 43.9, 42.4, 30.9, 24.0, 13.8. ( $Z$ )  $\delta$  208.7, 140.2, 138.0, 129.1, 128.4, 126.2, 122.4, 43.9, 42.2, 36.1, 29.9, 13.5.

HRMS(ESI):  $m/z$  Calcd. for  $C_{14}H_{18}NaO$   $[M+Na]^+$ :225.1250; Found:225.1249.

### 10-Chloro-5-ethylidenedecan-2-one (2t)

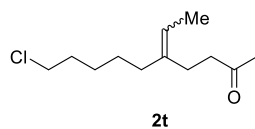

The title compound was prepared according to the general procedure as described, silica gel flash column chromatography was performed using hexanes and ethyl acetate (30:1) ( $R_f$  = 0.40 in hexane:ethyl acetate = 15:1) resulting in 15.6 mg of yellow liquid in 72% yield,  $E/Z$  50:50.

$^1H$  NMR (600 MHz,  $CDCl_3$ ) ( $E$ )  $\delta$  5.24 (q,  $J$  = 6.6 Hz, 1H), 3.56-3.53 (m, 2H), 2.52 (t,  $J$  = 7.8 Hz, 2H), 2.30-2.27 (m, 2H), 2.15 (s, 3H), 2.03 (t,  $J$  = 7.8 Hz, 2H), 1.81-1.74 (m, 5H), 1.60-1.57 (m, 2H), 1.46-1.43 (m, 2H). ( $Z$ )  $\delta$  5.20 (q,  $J$  = 6.6 Hz, 1H), 3.53-3.52 (m, 2H), 2.47 (t,  $J$  = 7.8 Hz, 2H), 2.26-2.23 (m, 2H), 2.14 (s, 3H), 1.97 (t,  $J$  = 7.2 Hz, 2H), 1.81-1.74 (m, 5H), 1.60-1.57 (m, 2H), 1.39-1.36 (m, 2H).

$^{13}C$  NMR (151 MHz,  $CDCl_3$ ) ( $E$ )  $\delta$  208.9, 138.5, 120.0, 45.2, 42.4, 36.7, 32.7, 30.0, 29.9, 27.5, 24.0, 13.3. ( $Z$ )  $\delta$  209.0, 138.3, 119.4, 45.2, 42.6, 36.7, 32.7, 30.8, 30.0, 27.0, 26.7, 13.4.

HRMS(ESI):  $m/z$  Calcd. for  $C_{12}H_{21}ClNaO$   $[M+Na]^+$ :239.1173; Found:239.1172.

### 5-Ethylidene-10-phenoxydecane-2-one (2u)

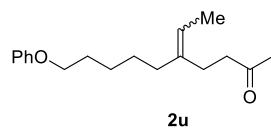

The title compound was prepared according to the general procedure as described, silica gel flash column chromatography was performed using hexanes and ethyl acetate (30:1) ( $R_f$  = 0.40 in hexane:ethyl acetate = 15:1) resulting in 17.7 mg of yellow liquid in 65% yield,  $E/Z$  50:50.

$^1H$  NMR (600 MHz,  $CDCl_3$ ) ( $E$ )  $\delta$  7.28 (d,  $J$  = 7.8 Hz, 2H), 6.93 (t,  $J$  = 7.2 Hz, 1H), 6.90-6.88 (m, 2H), 5.24 (q,  $J$  = 7.2 Hz, 1H), 3.96-3.94 (m, 2H), 2.51 (t,  $J$  = 7.2 Hz, 2H), 2.30-2.24 (m, 2H), 2.15 (s, 3H), 2.06-2.03 (m, 2H), 1.82-1.76 (m, 5H), 1.59-1.57 (m, 2H), 1.49-1.46 (m, 2H). ( $Z$ )  $\delta$  7.28 (d,  $J$  = 7.8 Hz, 2H), 6.93 (t,  $J$  = 7.2 Hz, 1H), 6.90-6.88 (m, 2H), 5.20 (q,  $J$  = 6.6 Hz, 1H), 3.96-3.94 (m, 2H), 2.47 (t,  $J$  = 7.8 Hz, 2H), 2.30-

2.24 (m, 2H), 2.14 (s, 3H), 1.99-1.97 (m, 2H), 1.82-1.76 (m, 5H), 1.59-1.57 (m, 2H), 1.45-1.42 (m, 2H).

$^{13}\text{C}$  NMR (151 MHz,  $\text{CDCl}_3$ ) (*E*)  $\delta$  209.0, 159.2, 138.7, 129.5, 120.6, 119.3, 114.6, 67.9, 42.7, 36.8, 30.9, 30.0, 29.4, 28.0, 24.0, 13.3. (*Z*)  $\delta$  208.9, 159.2, 138.5, 129.5, 120.6, 119.9, 114.6, 67.9, 42.4, 36.8, 30.0, 29.8, 29.3, 26.3, 26.0, 13.4.

HRMS(ESI):  $m/z$  Calcd. for  $\text{C}_{18}\text{H}_{26}\text{NaO}_2$   $[\text{M}+\text{Na}]^+$ :297.1825; Found:197.1823.

#### 4-(6-Oxohept-2-en-3-yl)-N,N-dipropylbenzenesulfonamide (2v)

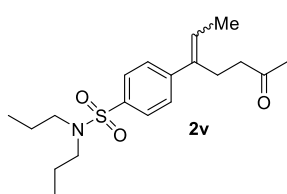

The title compound was prepared according to the general procedure as described, silica gel flash column chromatography was performed using hexanes and ethyl acetate (30:1) ( $R_f$  = 0.40 in hexane:ethyl acetate = 15:1)

resulting in 16.5 mg of yellow liquid in 47% yield, *E/Z* 70:30.

$^1\text{H}$  NMR (600 MHz,  $\text{CDCl}_3$ ) (*E*)  $\delta$  7.73 (d,  $J$  = 8.4 Hz, 2H), 7.40 (d,  $J$  = 8.4 Hz, 2H), 5.88 (q,  $J$  = 7.2 Hz, 1H), 3.12-3.07 (m, 4H), 2.80 (t,  $J$  = 7.8 Hz, 2H), 2.44-2.40 (m, 2H), 2.09 (s, 3H), 1.84 (d,  $J$  = 7.2 Hz, 3H), 1.60-1.53 (m, 4H), 0.88 (t,  $J$  = 7.2 Hz, 6H). (*Z*)  $\delta$  7.73 (d,  $J$  = 8.4 Hz, 2H), 7.27-7.25 (m, 2H), 5.65 (q,  $J$  = 6.6 Hz, 1H), 3.12-3.07 (m, 4H), 2.62 (t,  $J$  = 7.8 Hz, 2H), 2.44-2.40 (m, 2H), 2.08 (s, 3H), 1.60-1.53 (m, 7H), 0.88 (t,  $J$  = 7.2 Hz, 6H).

$^{13}\text{C}$  NMR (151 MHz,  $\text{CDCl}_3$ ) (*E*)  $\delta$  207.8, 146.4, 138.8, 138.2, 129.1, 127.2, 126.6, 50.1, 41.9, 30.0, 23.1, 22.1, 14.3, 11.2. (*Z*)  $\delta$  207.9, 144.7, 138.5, 138.2, 127.1, 126.5, 123.6, 50.0, 42.2, 32.7, 29.9, 22.1, 14.7, 11.2.

HRMS(ESI):  $m/z$  Calcd. for  $\text{C}_{19}\text{H}_{29}\text{NNaO}_3\text{S}$   $[\text{M}+\text{Na}]^+$ :374.1760; Found:374.1753.

#### 5-(1-(2-Fluoro-[1,1'-biphenyl]-4-yl)ethyl)hept-5-en-2-one (2w)

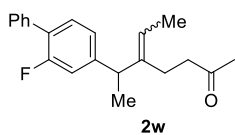

The title compound was prepared according to the general procedure as described, silica gel flash column chromatography was performed using hexanes and ethyl acetate (30:1) ( $R_f$  = 0.40

in hexane:ethyl acetate = 15:1) resulting in 9.5 mg of yellow liquid in 31% yield, *E/Z*



70:30.

$^1\text{H}$  NMR (600 MHz,  $\text{CDCl}_3$ ) (*E*)  $\delta$  7.55-7.53 (m, 2H), 7.43 (t,  $J = 7.8$  Hz, 2H), 7.36-7.34 (m, 2H), 7.08-7.03 (m, 2H), 5.49 (q,  $J = 6.6$  Hz, 1H), 3.43 (q,  $J = 7.2$  Hz, 1H), 2.37-2.32 (m, 2H), 2.24-2.16 (m, 2H), 2.06 (s, 3H), 1.68 (d,  $J = 6.6$  Hz, 3H), 1.36 (d,  $J = 7.2$  Hz, 3H). (*Z*)  $\delta$  7.55-7.53 (m, 2H), 7.43 (t,  $J = 7.8$  Hz, 2H), 7.36-7.34 (m, 2H), 7.01-6.96 (m, 2H), 5.30 (q,  $J = 7.2$  Hz, 1H), 4.13 (q,  $J = 7.2$  Hz, 1H), 2.37-2.32 (m, 2H), 2.13-2.09 (m, 2H), 2.05 (s, 3H), 1.76 (d,  $J = 6.6$  Hz, 3H), 1.42 (d,  $J = 7.2$  Hz, 3H).

$^{13}\text{C}$  NMR (151 MHz,  $\text{CDCl}_3$ ) (*E*)  $\delta$  208.6, 159.9 (d,  $J = 247.9$  Hz), 147.6, 141.8, 136.0, 130.6 (d,  $J = 3.9$  Hz), 129.1 (d,  $J = 3.0$  Hz), 128.5, 127.6, 123.8, 120.4, 119.3, 115.2 (d,  $J = 23.1$  Hz), 45.5, 42.8, 29.9, 24.0, 20.5, 13.5. (*Z*)  $\delta$  208.7, 159.9 (d,  $J = 247.9$  Hz), 147.6, 141.7, 136.0, 130.4 (d,  $J = 4.4$  Hz), 129.1 (d,  $J = 3.0$  Hz), 128.5, 127.6, 123.4, 120.4, 119.3, 115.1 (d,  $J = 23.2$  Hz), 45.5, 42.9, 29.9, 25.6, 20.5, 17.2.

$^{19}\text{F}$  NMR (565 MHz,  $\text{CDCl}_3$ ) (*E*)  $\delta$  -118.4. (*Z*)  $\delta$  -118.5.

HRMS(ESI):  $m/z$  Calcd. for  $\text{C}_{21}\text{H}_{23}\text{FNaO}$   $[\text{M}+\text{Na}]^+$ :333.1625; Found:333.1628.

### 5-(1-(4-Isobutylphenyl)ethyl)hept-5-en-2-one (2x)

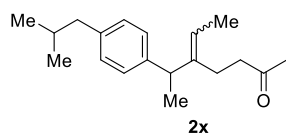

The title compound was prepared according to the general procedure as described, silica gel flash column chromatography was performed using hexanes and ethyl acetate (30:1) ( $R_f = 0.40$  in hexane:ethyl acetate = 15:1) resulting in 9.9 mg of yellow liquid in 36% yield, *E/Z* 50:50.

$^1\text{H}$  NMR (600 MHz,  $\text{CDCl}_3$ ) (*E*)  $\delta$  7.13-7.03 (m, 4H), 5.44 (q,  $J = 7.2$  Hz, 1H), 3.36 (q,  $J = 7.2$  Hz, 1H), 2.44-2.42 (m, 2H), 2.36-2.24 (m, 2H), 2.21-2.16 (m, 2H), 1.98 (s, 3H), 1.85-1.81 (m, 1H), 1.64 (d,  $J = 6.6$  Hz, 3H), 1.32 (d,  $J = 6.6$  Hz, 3H), 0.89 (d,  $J = 6.6$  Hz, 6H). (*Z*)  $\delta$  7.13-7.03 (m, 4H), 5.24 (q,  $J = 6.6$  Hz, 1H), 4.10 (q,  $J = 7.2$  Hz, 1H), 2.44-2.42 (m, 2H), 2.21-2.16 (m, 2H), 2.14-2.07 (m, 2H), 1.96 (s, 3H), 1.85-1.81 (m, 1H), 1.75 (d,  $J = 6.6$  Hz, 3H), 1.37 (d,  $J = 7.2$  Hz, 3H), 0.89 (d,  $J = 6.6$  Hz, 6H).

$^{13}\text{C}$  NMR (151 MHz,  $\text{CDCl}_3$ ) (*E*)  $\delta$  208.7, 142.8, 139.6, 139.4, 129.1, 127.5, 119.4, 45.9, 45.2, 42.9, 30.4, 29.7, 24.0, 22.5, 20.5, 13.5. (*Z*)  $\delta$  208.8, 141.7, 139.6, 139.4, 129.1, 127.2, 118.7, 45.9, 45.2, 43.4, 38.2, 29.7, 26.0, 22.5, 17.3, 13.4.

HRMS(ESI):  $m/z$  Calcd. for  $\text{C}_{19}\text{H}_{28}\text{NaO}$   $[\text{M}+\text{Na}]^+$ :295.2032; Found:295.2031.

**2,5,7,8-Tetramethyl-2-(4,8,12-trimethyltridecyl)chroman-6-yl-4-(6-oxohept-2-en-3-yl)benzoate (2y)**

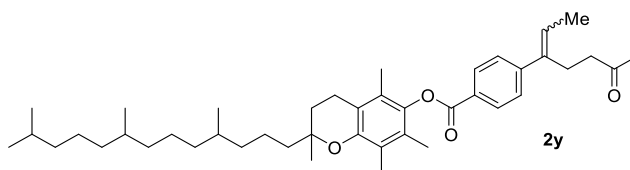

The title compound was prepared according to the general procedure as described, silica gel flash column chromatography was performed using hexanes and ethyl acetate (30:1) ( $R_f = 0.40$  in hexane:ethyl acetate = 15:1) resulting in 35.5 mg of yellow liquid in 55% yield, *E/Z* 60:40.

$^1\text{H}$  NMR (400 MHz,  $\text{CDCl}_3$ ) (*E*)  $\delta$  8.18 (d,  $J = 8.4$  Hz, 2H), 7.44 (d,  $J = 7.8$  Hz, 2H), 5.92 (q,  $J = 7.2$  Hz, 1H), 2.84 (t,  $J = 7.8$  Hz, 2H), 2.63-2.61 (m, 2H), 2.49-2.43 (m, 2H), 2.13-2.02 (m, 14H), 1.86 (d,  $J = 7.2$  Hz, 3H), 1.60-1.37 (m, 12H), 1.16-1.03 (m, 8H), 0.89-0.83 (m, 16H). (*Z*)  $\delta$  8.22 (d,  $J = 7.8$  Hz, 2H), 7.29 (d,  $J = 8.4$  Hz, 2H), 5.67 (q,  $J = 7.2$  Hz, 1H), 2.67 (t,  $J = 7.8$  Hz, 2H), 2.63-2.61 (m, 2H), 2.49-2.43 (m, 2H), 2.13-2.02 (m, 14H), 1.86 (d,  $J = 7.2$  Hz, 3H), 1.60-1.37 (m, 12H), 1.16-1.03 (m, 8H), 0.89-0.83 (m, 16H).

$^{13}\text{C}$  NMR (151 MHz,  $\text{CDCl}_3$ ) (*E*)  $\delta$  208.0, 165.0, 147.6, 140.7, 138.7, 130.3, 128.8, 127.9, 126.9, 126.3, 125.1, 123.1, 117.5, 75.1, 42.1, 39.8, 39.4, 37.6, 37.5, 37.4, 37.3, 32.9, 32.8, 31.2, 30.0, 29.7, 28.0, 24.8, 24.5, 23.7, 23.1, 22.6, 20.7, 19.7, 19.7, 19.6, 14.3, 13.1, 12.2, 11.9. (*Z*)  $\delta$  208.0, 165.0, 149.5, 145.8, 139.3, 130.1, 128.8, 128.1, 126.9, 126.2, 123.4, 123.1, 117.5, 75.1, 42.4, 40.5, 39.4, 37.6, 37.5, 37.4, 37.3, 32.8, 32.7, 31.1, 30.0, 29.7, 28.0, 24.8, 24.5, 24.2, 23.1, 22.7, 21.1, 19.8, 19.7, 19.6, 14.7, 13.1, 12.2, 11.9.

HRMS(ESI):  $m/z$  Calcd. for  $C_{43}H_{64}NaO_4$   $[M+Na]^+$ :667.4697; Found:667.4696.

### 5,7-Diphenylhept-5-en-2-one (4a)

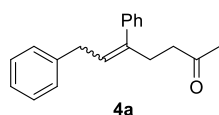

The title compound was prepared according to the general procedure as described, silica gel flash column chromatography was performed using hexanes and ethyl acetate (30:1) ( $R_f = 0.40$  in hexane:ethyl acetate = 15:1) resulting in 14.5 mg of yellow liquid in 55% yield, *E/Z* 40:60.

$^1H$  NMR (400 MHz,  $CDCl_3$ ) (*E*)  $\delta$  7.30-7.37 (m, 5H), 7.24-7.22 (m, 3H), 7.11 (d,  $J = 7.6$  Hz, 2H), 5.87 (t,  $J = 7.6$  Hz, 1H), 3.58 (d,  $J = 7.2$  Hz, 2H), 2.88 (t,  $J = 7.6$  Hz, 2H), 2.48-2.44 (m, 2H), 2.06 (s, 3H). (*Z*)  $\delta$  7.37-7.32 (m, 5H), 7.20-7.17 (m, 3H), 7.11 (d,  $J = 7.6$  Hz, 2H), 5.67 (t,  $J = 7.2$  Hz, 1H), 3.27 (d,  $J = 7.6$  Hz, 2H), 2.67 (t,  $J = 7.6$  Hz, 2H), 2.48-2.44 (m, 2H), 2.06 (s, 3H).

$^{13}C$  NMR (151 MHz,  $CDCl_3$ ) (*E*)  $\delta$  208.4, 142.3, 140.7, 140.2, 128.6, 128.5, 128.4, 127.1, 126.6, 126.2, 126.0, 42.5, 35.2, 33.4, 30.1. (*Z*)  $\delta$  208.3, 142.2, 141.0, 139.6, 128.7, 128.5, 128.2, 127.2, 126.7, 126.2, 125.6, 42.5, 34.8, 30.1, 23.9.

HRMS(ESI):  $m/z$  Calcd. for  $C_{19}H_{20}NaO$   $[M+Na]^+$ :287.1406 Found:287.1406.

### 5-Phenyl-7-(*o*-tolyl)hept-5-en-2-one (4b)

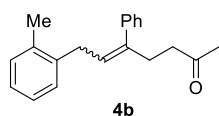

The title compound was prepared according to the general procedure as described, silica gel flash column chromatography was performed using hexanes and ethyl acetate (30:1) ( $R_f = 0.40$  in hexane:ethyl acetate = 15:1) resulting in 17.3 mg of yellow liquid in 62% yield, *E/Z* 50:50.

$^1H$  NMR (600 MHz,  $CDCl_3$ ) (*E*)  $\delta$  7.36-7.28 (m, 4H), 7.18 (d,  $J = 7.8$  Hz, 3H), 7.15-7.12 (m, 2H), 5.79 (t,  $J = 7.2$  Hz, 1H), 3.53 (d,  $J = 7.2$  Hz, 2H), 2.89 (t,  $J = 7.8$  Hz, 2H), 2.46 (t,  $J = 7.8$  Hz, 2H), 2.33 (s, 3H), 2.06 (s, 3H). (*Z*)  $\delta$  7.36-7.28 (m, 4H), 7.15-7.12 (m, 2H), 7.10-7.07 (m, 3H), 5.61 (t,  $J = 7.2$  Hz, 1H), 3.24 (d,  $J = 7.2$  Hz, 2H), 2.67 (t,  $J = 7.8$  Hz, 2H), 2.46 (t,  $J = 7.8$  Hz, 2H), 2.13 (s, 3H), 2.06 (s, 3H).

$^{13}\text{C}$  NMR (151 MHz,  $\text{CDCl}_3$ ) (*E*)  $\delta$  208.4, 142.2, 140.2, 139.2, 136.4, 130.3, 128.7, 128.5, 127.7, 127.2, 126.4, 126.2, 125.7, 42.4, 32.6, 30.2, 23.9, 19.8. (*Z*)  $\delta$  208.5, 140.7, 139.6, 139.5, 136.3, 130.2, 128.5, 128.4, 127.7, 127.1, 126.5, 126.2, 126.1, 42.5, 33.4, 32.9, 30.1, 19.5.

HRMS(ESI):  $m/z$  Calcd. for  $\text{C}_{20}\text{H}_{22}\text{NaO}$   $[\text{M}+\text{Na}]^+$ :301.1563; Found:301.1562.

#### 5-Phenyl-7-(*m*-tolyl)hept-5-en-2-one (4c)

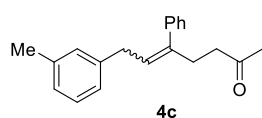

The title compound was prepared according to the general procedure as described, silica gel flash column chromatography was performed using hexanes and ethyl acetate (30:1) ( $R_f = 0.40$

in hexane:ethyl acetate = 15:1) resulting in 8.4 mg of yellow liquid in 30% yield, *E/Z* 40:60.

$^1\text{H}$  NMR (600 MHz,  $\text{CDCl}_3$ ) (*E*)  $\delta$  7.37-7.31 (m, 3H), 7.20-7.18 (m, 3H), 7.04-7.02 (m, 1H), 6.92-6.91 (m, 2H), 5.87 (t,  $J = 7.8$  Hz, 1H), 3.54 (d,  $J = 7.2$  Hz, 2H), 2.88 (t,  $J = 7.8$  Hz, 2H), 2.46 (t,  $J = 7.8$  Hz, 2H), 2.34-2.32 (m, 3H), 2.07 (s, 3H). (*Z*)  $\delta$  7.37-7.31 (m, 3H), 7.20-7.18 (m, 3H), 7.04-7.02 (m, 1H), 6.92-6.91 (m, 2H), 5.66 (t,  $J = 7.8$  Hz, 1H), 3.24 (d,  $J = 7.2$  Hz, 2H), 2.67 (t,  $J = 7.8$  Hz, 2H), 2.46 (t,  $J = 7.8$  Hz, 2H), 2.34-2.32 (m, 3H), 2.07 (s, 3H).

$^{13}\text{C}$  NMR (151 MHz,  $\text{CDCl}_3$ ) (*E*)  $\delta$  208.2, 142.3, 140.9, 139.5, 138.3, 129.4, 128.6, 128.5, 127.4, 126.9, 126.4, 125.6, 125.5, 46.2, 34.8, 30.1, 23.2, 22.8. (*Z*)  $\delta$  208.3, 141.3, 140.6, 140.3, 138.1, 129.2, 128.6, 128.5, 127.1, 126.8, 126.6, 125.7, 125.4, 42.5, 35.2, 33.5, 24.0, 21.5.

HRMS(ESI):  $m/z$  Calcd. for  $\text{C}_{20}\text{H}_{22}\text{NaO}$   $[\text{M}+\text{Na}]^+$ :301.1563; Found:301.1560.

#### 7-(4-Methoxyphenyl)-5-phenylhept-5-en-2-one (4d)

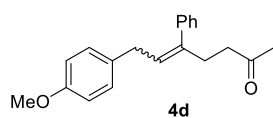

The title compound was prepared according to the general procedure as described, silica gel flash column chromatography was performed using hexanes and ethyl acetate (20:1) ( $R_f =$

0.40 in hexane:ethyl acetate = 10:1) resulting in 18.8 mg of yellow liquid in 65% yield, *E/Z* 40:60.

<sup>1</sup>H NMR (600 MHz, CDCl<sub>3</sub>) (*E*) δ 7.32-7.27 (m, 3H), 7.15-7.12 (m, 2H), 6.84 (d, *J* = 8.4 Hz, 2H), 6.81 (d, *J* = 8.4 Hz, 2H), 5.85 (t, *J* = 7.2 Hz, 1H), 3.79 (s, 3H), 3.51 (d, *J* = 7.2 Hz, 2H), 2.88 (t, *J* = 7.8 Hz, 2H), 2.47-2.44 (m, 2H), 2.06 (s, 3H). (*Z*) δ 7.36-7.32 (m, 3H), 7.19-7.17 (m, 2H), 7.03 (d, *J* = 8.4 Hz, 2H), 6.81 (d, *J* = 8.4 Hz, 2H), 5.64 (t, *J* = 7.2 Hz, 1H), 3.78 (s, 3H), 3.21 (d, *J* = 7.2 Hz, 2H), 2.66 (t, *J* = 7.8 Hz, 2H), 2.47-2.44 (m, 2H), 2.06 (s, 3H).

<sup>13</sup>C NMR (151 MHz, CDCl<sub>3</sub>) (*E*) δ 208.4, 158.1, 142.2, 139.2, 133.0, 129.4, 128.6, 128.5, 127.1, 126.6, 114.1, 55.4, 42.5, 34.3, 30.2, 23.8. (*Z*) δ 208.5, 157.9, 140.3, 140.2, 133.4, 129.3, 128.6, 128.4, 127.1, 126.6, 114.0, 55.4, 42.5, 33.9, 33.4, 30.1.

HRMS(ESI): *m/z* Calcd. for C<sub>20</sub>H<sub>22</sub>NaO<sub>2</sub> [M+Na]<sup>+</sup>:317.1512; Found:317.1511.

#### 7-(4-Chlorophenyl)-5-phenylhept-5-en-2-one (4e)

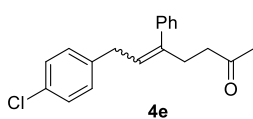

The title compound was prepared according to the general procedure as described, silica gel flash column chromatography was performed using hexanes and ethyl acetate (30:1) (*R<sub>f</sub>* = 0.40

in hexane:ethyl acetate = 15:1) resulting in 17.9 mg of yellow liquid in 60% yield, *E/Z* 30:70.

<sup>1</sup>H NMR (600 MHz, CDCl<sub>3</sub>) (*E*) δ 7.35 (t, *J* = 7.2 Hz, 1H), 7.32-7.28 (m, 2H), 7.22 (d, *J* = 7.8 Hz, 2H), 7.16-7.15 (m, 2H), 7.03 (d, *J* = 8.4 Hz, 2H), 5.81 (t, *J* = 7.2 Hz, 1H), 3.54 (d, *J* = 7.8 Hz, 2H), 2.86 (t, *J* = 7.8 Hz, 2H), 2.47-2.44 (m, 2H), 2.06 (s, 3H). (*Z*) δ 7.35 (t, *J* = 7.2 Hz, 1H), 7.32-7.28 (m, 2H), 7.22 (d, *J* = 7.8 Hz, 2H), 7.16-7.15 (m, 2H), 7.03 (d, *J* = 8.4 Hz, 2H), 5.62 (t, *J* = 7.2 Hz, 1H), 3.23 (d, *J* = 7.2 Hz, 2H), 2.66 (t, *J* = 7.8 Hz, 2H), 2.47-2.44 (m, 2H), 2.06 (s, 3H).

<sup>13</sup>C NMR (151 MHz, CDCl<sub>3</sub>) (*E*) δ 208.2, 145.5, 135.6, 133.2, 129.9, 129.4, 128.8, 128.6, 127.1, 126.7, 125.1, 42.4, 34.5, 34.1, 13.3. (*Z*) δ 208.3, 145.5, 136.3, 131.9, 129.8, 129.7, 128.5, 128.5, 127.9, 126.6, 125.6, 46.1, 40.0, 33.4, 18.3.

HRMS(ESI): *m/z* Calcd. for C<sub>19</sub>H<sub>19</sub>ClNaO [M+Na]<sup>+</sup>:321.1017; Found:321.1019.

### 7-Cyclopropyl-5-phenylhept-5-en-2-one (4f)

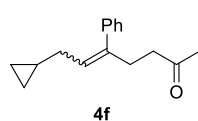

The title compound was prepared according to the general procedure as described, silica gel flash column chromatography was performed using hexanes and ethyl acetate (30:1) ( $R_f = 0.40$  in hexane:ethyl

acetate = 15:1) resulting in 17.1 mg of yellow liquid in 75% yield, *E/Z* 70:30.

$^1\text{H}$  NMR (600 MHz,  $\text{CDCl}_3$ ) (*E*)  $\delta$  7.38-7.34 (m, 2H), 7.33-7.32 (m, 1H), 7.27-7.25 (m, 1H), 7.14 (d,  $J = 7.8$  Hz, 1H), 5.80 (t,  $J = 7.2$  Hz, 1H), 2.79 (t,  $J = 7.8$  Hz, 2H), 2.47-2.44 (m, 2H), 2.15 (t,  $J = 7.2$  Hz, 2H), 2.09 (s, 3H), 0.84-0.81 (m, 1H), 0.48 (d,  $J = 7.8$  Hz, 2H), 0.15-0.14 (m, 2H). (*Z*)  $\delta$  7.38-7.34 (m, 2H), 7.33-7.32 (m, 1H), 7.27-7.25 (m, 1H), 7.14 (d,  $J = 7.8$  Hz, 1H), 5.60 (t,  $J = 7.2$  Hz, 1H), 2.65 (t,  $J = 7.8$  Hz, 2H), 2.47-2.44 (m, 2H), 2.09 (s, 3H), 1.85 (t,  $J = 7.2$  Hz, 2H), 0.69-0.67 (m, 1H), 0.40 (d,  $J = 7.8$  Hz, 2H), 0.025-0.007 (m, 2H).

$^{13}\text{C}$  NMR (151 MHz,  $\text{CDCl}_3$ ) (*E*)  $\delta$  208.5, 142.5, 138.6, 128.6, 128.5, 127.0, 126.5, 42.7, 33.5, 33.3, 23.9, 11.1, 4.4. (*Z*)  $\delta$  208.7, 140.6, 139.6, 129.1, 128.3, 127.3, 126.8, 42.7, 33.7, 30.1, 30.1, 11.2, 4.2.

HRMS(ESI):  $m/z$  Calcd. for  $\text{C}_{16}\text{H}_{20}\text{NaO}$  [ $\text{M}+\text{Na}$ ] $^+$ :251.1406; Found:251.1407.

### 5-Phenylundec-5-en-2-one (4g)

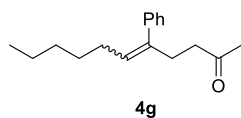

The title compound was prepared according to the general procedure as described, silica gel flash column chromatography was performed using hexanes and ethyl acetate (30:1) ( $R_f = 0.40$

in hexane:ethyl acetate = 15:1) resulting in 20.0 mg of yellow liquid in 82% yield, *E/Z* 70:30.

$^1\text{H}$  NMR (600 MHz,  $\text{CDCl}_3$ ) (*E*)  $\delta$  7.31-7.30 (m, 4H), 7.26-7.21 (m, 1H), 5.68 (t,  $J = 7.2$  Hz, 1H), 2.77 (t,  $J = 7.8$  Hz, 2H), 2.44-2.40 (m, 2H), 2.18 (q,  $J = 7.2$  Hz, 2H), 2.07 (s, 3H), 1.46-1.41 (m, 2H), 1.34-1.29 (m, 2H), 1.23-1.17 (m, 2H), 0.91-0.89 (m, 3H). (*Z*)  $\delta$  7.31-7.30 (m, 4H), 7.13-7.11 (m, 1H), 5.47 (t,  $J = 7.8$  Hz, 1H), 2.61 (t,  $J = 7.8$  Hz,

2H), 2.44-2.40 (m, 2H), 2.07 (s, 3H), 1.90 (q,  $J = 7.8$  Hz, 2H), 1.34-1.29 (m, 6H), 0.84 (t,  $J = 7.8$  Hz, 3H).

$^{13}\text{C}$  NMR (151 MHz,  $\text{CDCl}_3$ ) (*E*)  $\delta$  208.7, 142.6, 138.4, 130.4, 128.5, 126.9, 126.5, 42.7, 31.7, 30.1, 29.8, 28.6, 23.8, 22.7, 14.2. (*Z*)  $\delta$  208.7, 140.7, 139.2, 128.6, 128.5, 128.3, 126.7, 42.7, 33.5, 31.5, 30.1, 29.8, 28.9, 22.6, 14.2.

HRMS(ESI):  $m/z$  Calcd. for  $\text{C}_{17}\text{H}_{24}\text{NaO}$  [ $\text{M}+\text{Na}$ ] $^+$ :267.1719; Found:267.1721.

#### 5-Phenyl-7-(trimethylsilyl)hept-5-en-2-one (4h)

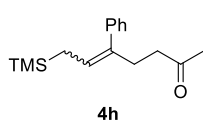

The title compound was prepared according to the general procedure as described, silica gel flash column chromatography was performed using hexanes and ethyl acetate (30:1) ( $R_f = 0.40$  in hexane:ethyl acetate = 15:1) resulting in 19.0 mg of yellow liquid in 73% yield, *E/Z* 70:30.

$^1\text{H}$  NMR (600 MHz,  $\text{CDCl}_3$ ) (*E*)  $\delta$  7.40-7.35 (m, 2H), 7.33-7.26 (m, 2H), 7.17 (d,  $J = 7.2$  Hz, 1H), 5.80 (t,  $J = 8.4$  Hz, 1H), 2.80 (t,  $J = 7.8$  Hz, 2H), 2.50-2.45 (m, 2H), 2.13 (s, 3H), 1.72 (d,  $J = 9.0$  Hz, 2H), 0.11 (s, 9H). (*Z*)  $\delta$  7.40-7.35 (m, 2H), 7.33-7.26 (m, 2H), 7.17 (d,  $J = 7.2$  Hz, 1H), 5.57 (t,  $J = 8.4$  Hz, 1H), 2.67 (t,  $J = 7.8$  Hz, 2H), 2.50-2.45 (m, 2H), 2.13 (s, 3H), 1.43 (d,  $J = 8.4$  Hz, 2H), 0.11 (s, 9H).

$^{13}\text{C}$  NMR (151 MHz,  $\text{CDCl}_3$ ) (*E*)  $\delta$  211.3, 145.7, 138.8, 131.1, 131.0, 129.2, 129.0, 45.2, 32.7, 26.0, 22.9, 1.2. (*Z*)  $\delta$  211.3, 143.6, 140.1, 131.6, 129.2, 129.0, 126.7, 45.6, 36.6, 32.6, 22.1, 1.1.

HRMS(ESI):  $m/z$  Calcd. for  $\text{C}_{16}\text{H}_{24}\text{NaOSi}$  [ $\text{M}+\text{Na}$ ] $^+$ :283.1489; Found:283.1489.

#### 5-(Thiophen-2-yl)-7-(trimethylsilyl)hept-5-en-2-one (4i)

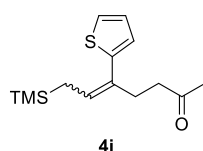

The title compound was prepared according to the general procedure as described, silica gel flash column chromatography was performed using hexanes and ethyl acetate (30:1) ( $R_f = 0.40$  in hexane:ethyl acetate = 15:1) resulting in 12.0 mg of yellow liquid in 45% yield, *E/Z* 60:40.

$^1\text{H}$  NMR (600 MHz,  $\text{CDCl}_3$ ) (*E*)  $\delta$  7.06 (dd,  $J = 4.8$  Hz, 0.6 Hz, 1H), 6.95-6.93 (m, 1H), 6.84 (dd,  $J = 3.6$  Hz, 1.2 Hz, 1H), 5.96 (t,  $J = 8.4$  Hz, 1H), 2.69-2.65 (m, 2H), 2.58 (t,

$J = 8.4$  Hz, 2H), 2.13 (s, 3H), 1.62 (d,  $J = 9.0$  Hz, 2H), 0.04 (s, 9H). (Z)  $\delta$  7.23 (dd,  $J = 5.4$  Hz, 1.2 Hz, 1H), 7.01-7.00 (m, 1H), 6.87 (dd,  $J = 3.6$  Hz, 1.2 Hz, 1H), 5.62 (t,  $J = 9.0$  Hz, 1H), 2.69-2.65 (m, 2H), 2.52 (t,  $J = 7.8$  Hz, 2H), 2.09 (s, 3H), 1.70 (d,  $J = 9.0$  Hz, 2H), 0.04 (s, 9H).

$^{13}\text{C}$  NMR (101 MHz,  $\text{CDCl}_3$ ) (*E*)  $\delta$  211.0, 149.6, 132.4, 129.8, 128.2, 127.9, 125.0, 45.2, 32.6, 26.4, 22.5, 1.0. (*Z*)  $\delta$  211.0, 144.6, 131.9, 129.7, 129.2, 126.6, 123.9, 45.8, 36.9, 32.3, 22.9, 1.0.

HRMS(ESI):  $m/z$  Calcd. for  $\text{C}_{14}\text{H}_{23}\text{OSSi}$  [ $\text{M}+\text{Na}$ ] $^+$ :267.1233; Found:267.1234.

#### 6-methyl-5-phenylhept-5-en-2-one (4j)

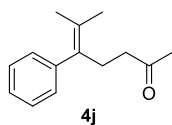

The title compound was prepared according to the general procedure as described, silica gel flash column chromatography was performed using hexanes and ethyl acetate (30:1) ( $R_f = 0.40$  in hexane:ethyl acetate =

15:1) resulting in 6.8 mg of yellow liquid in 34% yield.

$^1\text{H}$  NMR (600 MHz,  $\text{CDCl}_3$ )  $\delta$  7.31 (t,  $J = 7.2$  Hz, 2H), 7.21 (t,  $J = 7.2$  Hz, 1H), 7.07 (d,  $J = 7.8$  Hz, 2H), 2.63 (t,  $J = 8.4$  Hz, 2H), 2.35 (t,  $J = 8.4$  Hz, 2H), 2.04 (s, 3H), 1.82 (s, 3H), 1.53 (s, 3H).

$^{13}\text{C}$  NMR (151 MHz,  $\text{CDCl}_3$ )  $\delta$  209.0, 143.2, 133.5, 129.2, 128.6, 128.2, 126.2, 42.3, 30.0, 28.5, 22.4, 20.3.

HRMS(ESI):  $m/z$  Calcd. for  $\text{C}_{14}\text{H}_{18}\text{NaO}$  [ $\text{M}+\text{Na}$ ] $^+$ :225.1250; Found:225.1250.



## V References

1. S. Scaringi and C. Mazet, Kinetically Controlled Stereoselective Access to Branched 1,3-Dienes by Ru-Catalyzed Remote Conjugative Isomerization. *ACS Catal.* 2021, **11**, 7970-7977.
2. H. Faustino, I. Alonso, J. L. Mascareñas and F. López, Gold(I)-Catalyzed Cascade Cycloadditions between Allenamides and Carbonyl-Tethered Alkenes: An Enantioselective Approach to Oxa-Bridged Medium-Sized Carbocycles. *Angew. Chem. Int. Ed.* 2013, **52**, 6526-6530.
3. H. Chen, L. Huang, W. Fu, X. Liu and H. Jiang, Carbon–Carbon Bond Formation: Palladium-Catalyzed Oxidative Cross-Coupling of N-Tosylhydrazones with Allylic Alcohols. *Chem. Eur. J.* 2012, **18**, 10497-10500.

## VI NMR spectra

### The products 2:

<sup>1</sup>H NMR (400 MHz, CDCl<sub>3</sub>) for **2a**

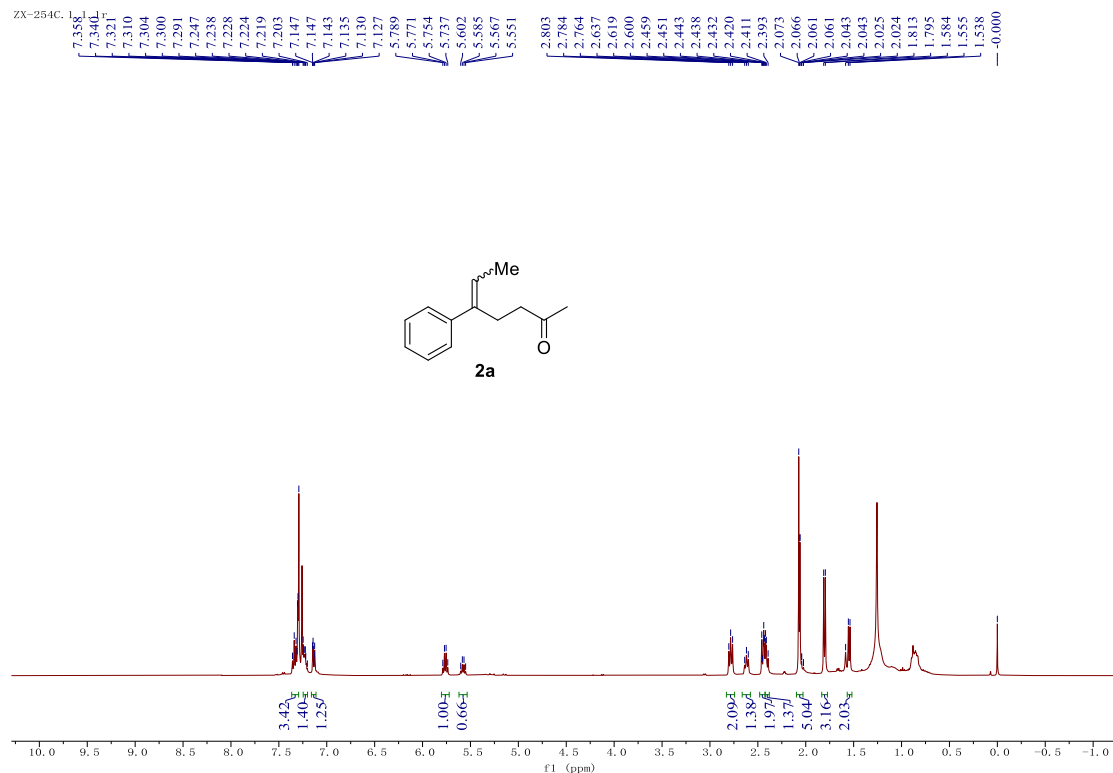

<sup>13</sup>C NMR (151 MHz, CDCl<sub>3</sub>) for **2a**

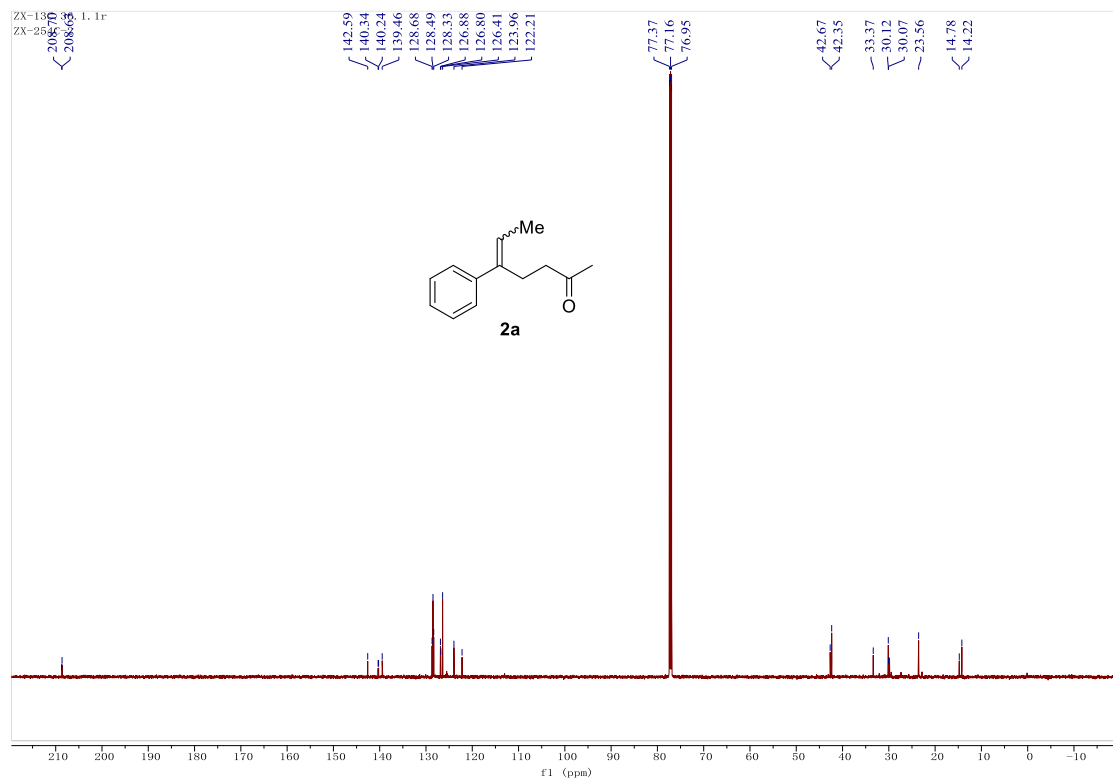

The *Z/E* configuration of **2a** was determined by 2D ( $^1\text{H}$ - $^1\text{H}$ ) NMR measurement as shown below.

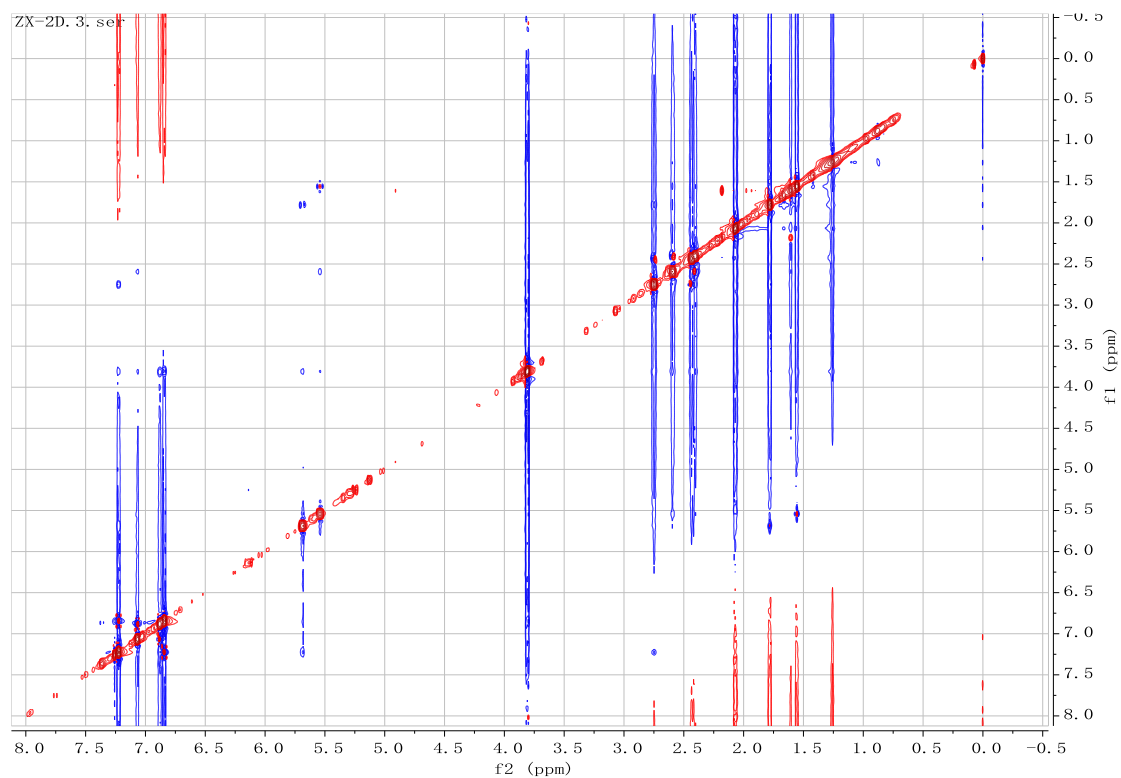

<sup>1</sup>H NMR (600 MHz, CDCl<sub>3</sub>) for **2b**

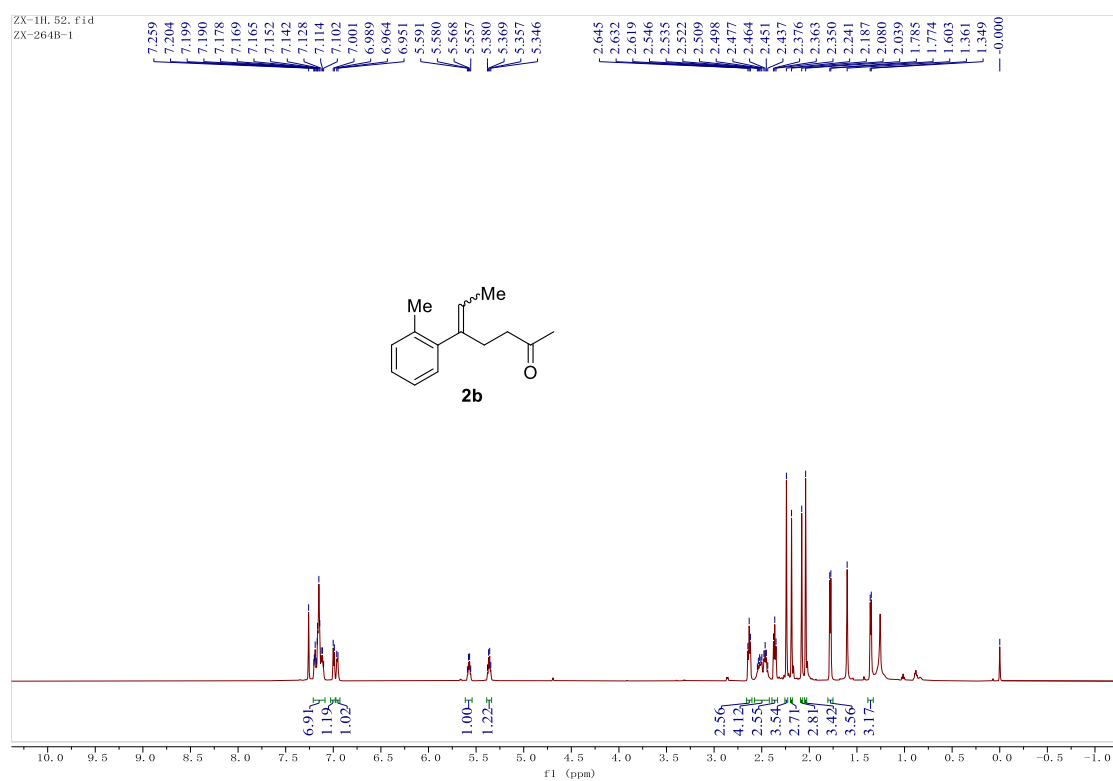

<sup>13</sup>C NMR (151 MHz, CDCl<sub>3</sub>) for **2b**

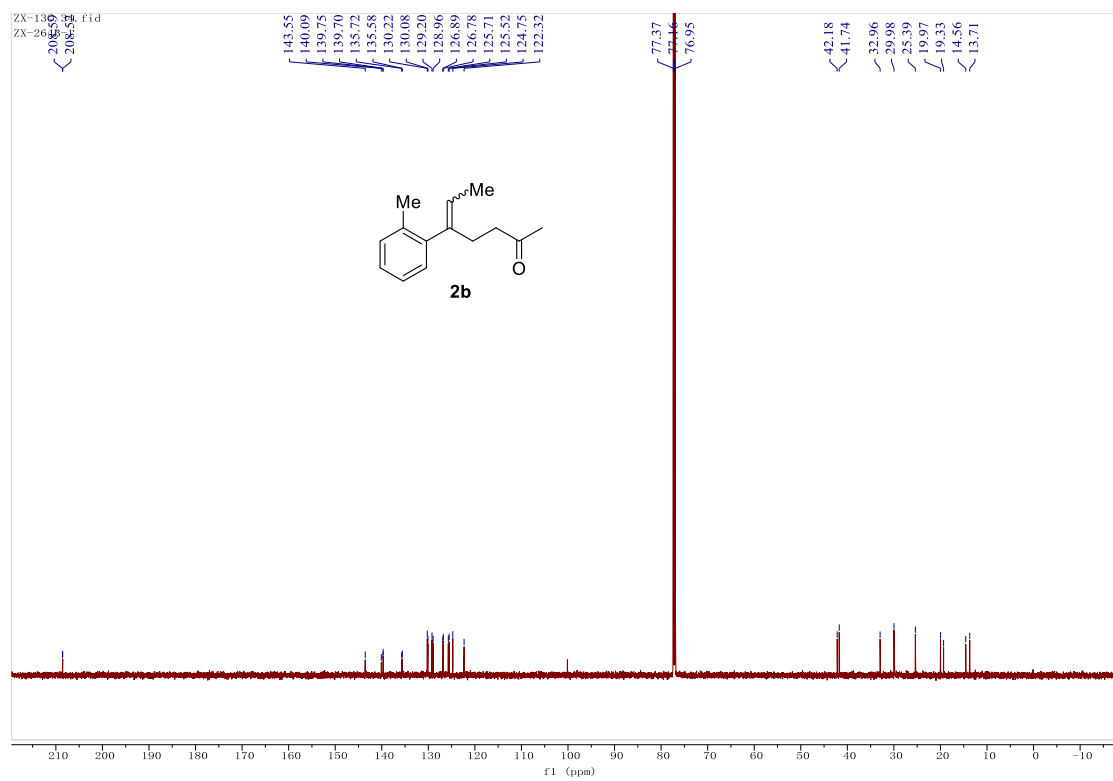

<sup>1</sup>H NMR (600 MHz, CDCl<sub>3</sub>) for **2c**

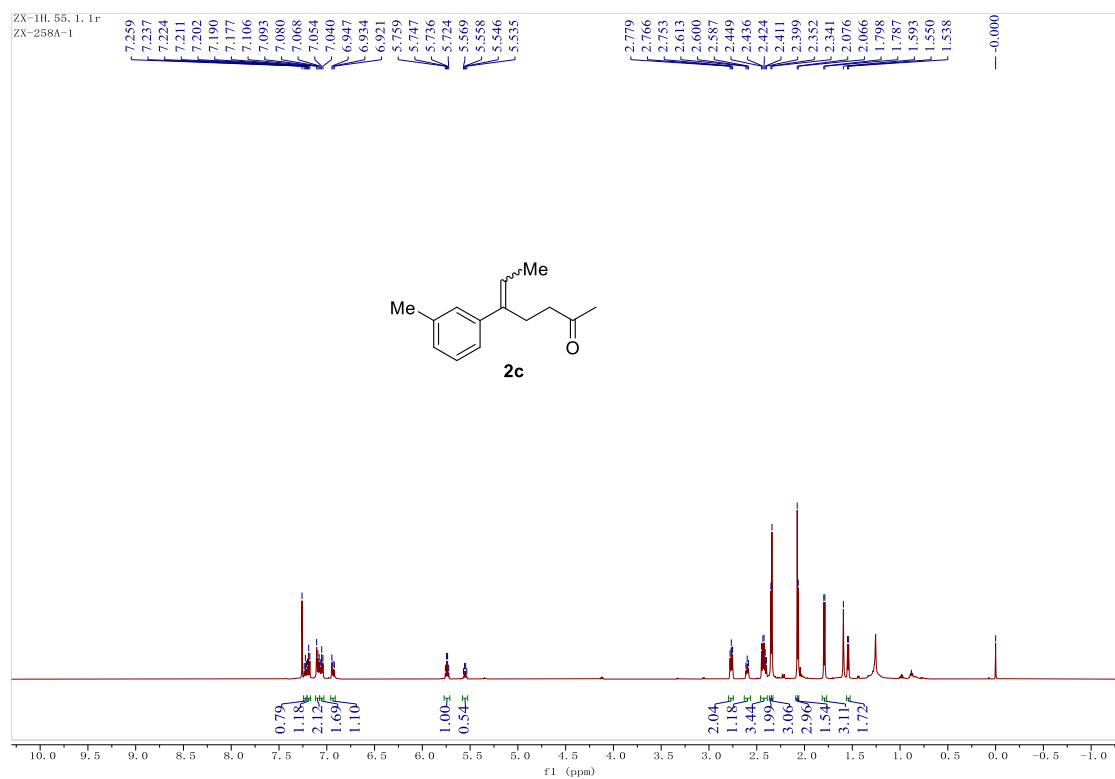

<sup>13</sup>C NMR (101 MHz, CDCl<sub>3</sub>) for **2c**

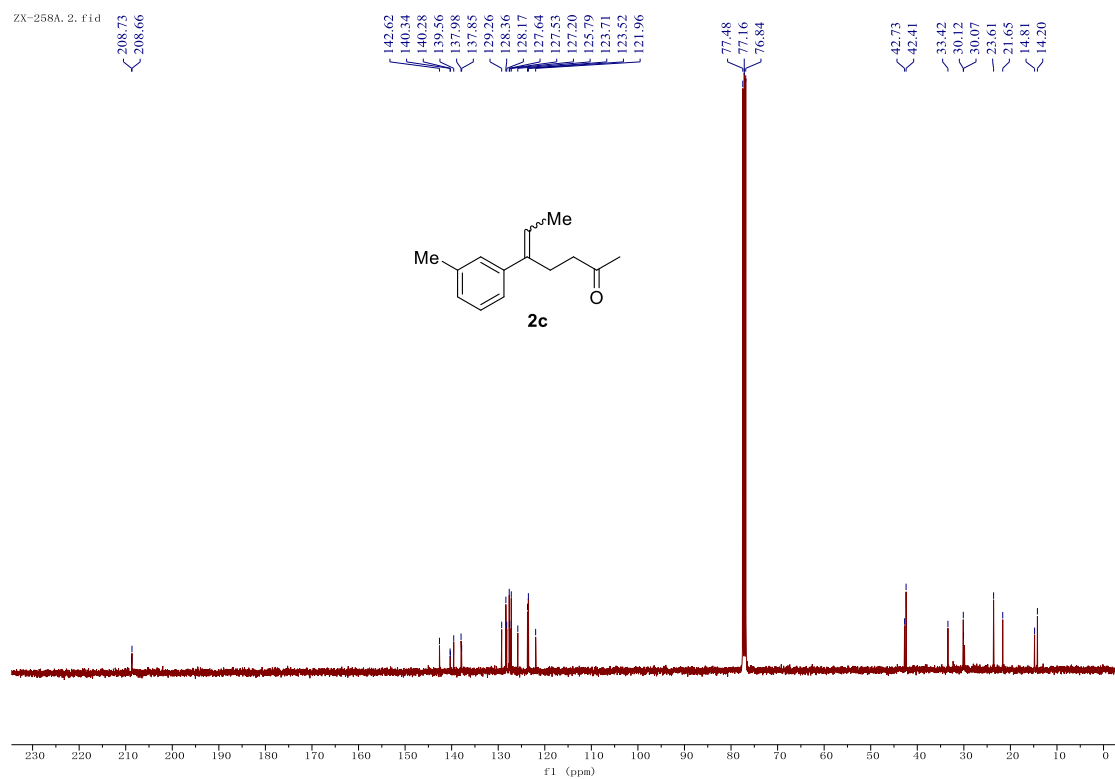

<sup>1</sup>H NMR (600 MHz, CDCl<sub>3</sub>) for **2d**

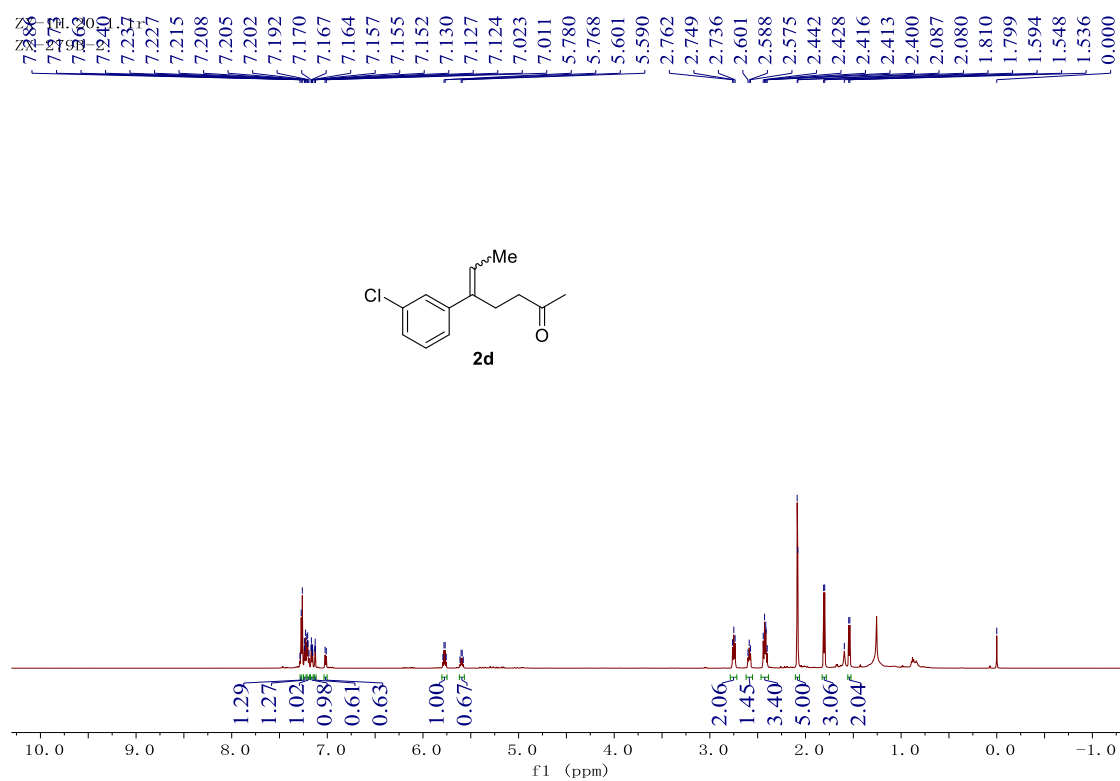

<sup>13</sup>C NMR (151 MHz, CDCl<sub>3</sub>) for **2d**

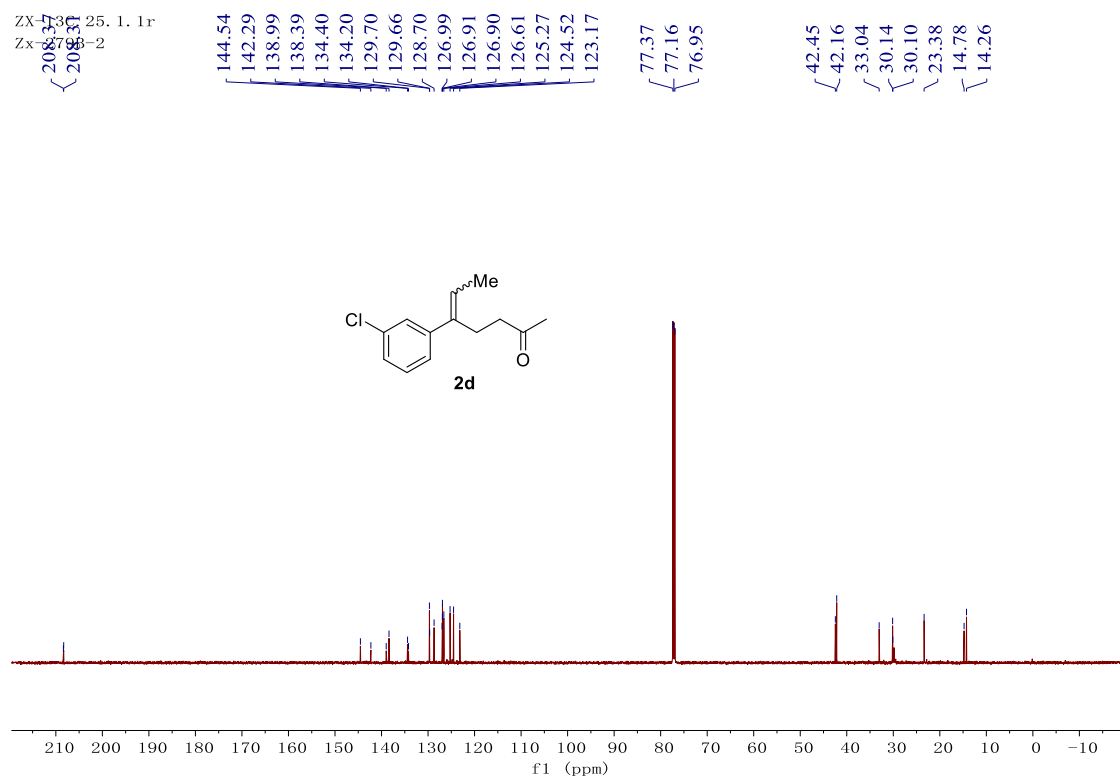

<sup>1</sup>H NMR (400 MHz, CDCl<sub>3</sub>) for **2e**

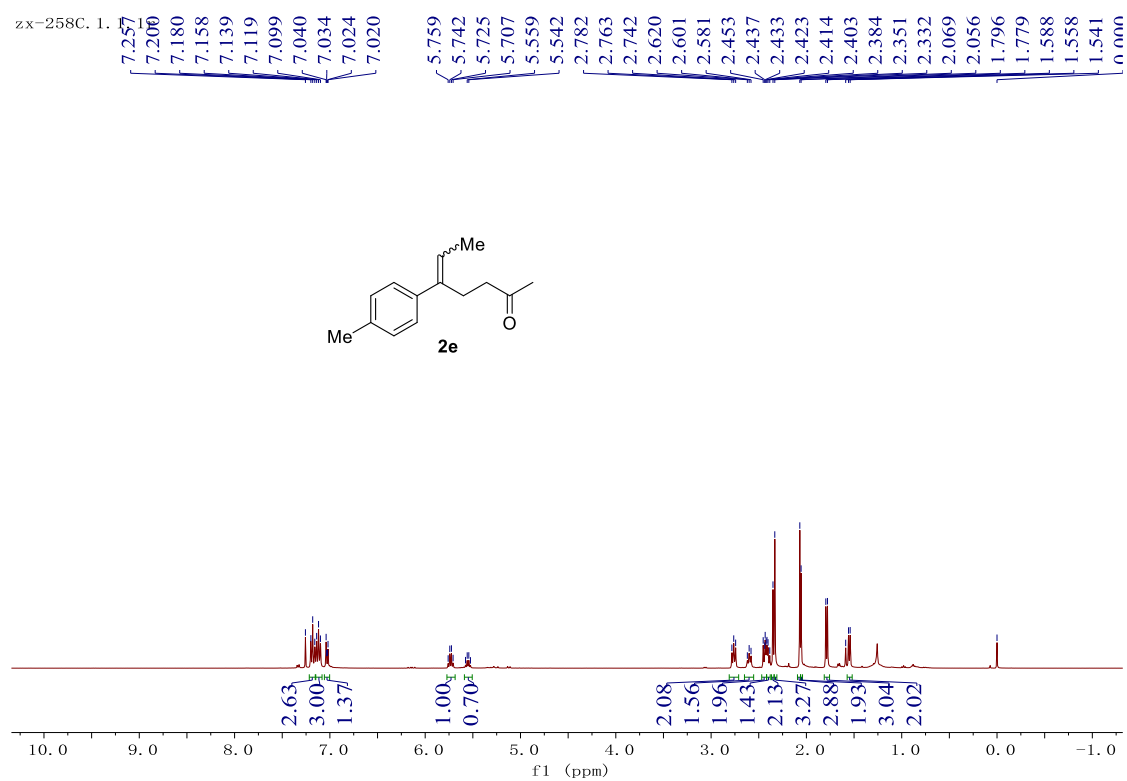

<sup>13</sup>C NMR (151 MHz, CDCl<sub>3</sub>) for **2e**

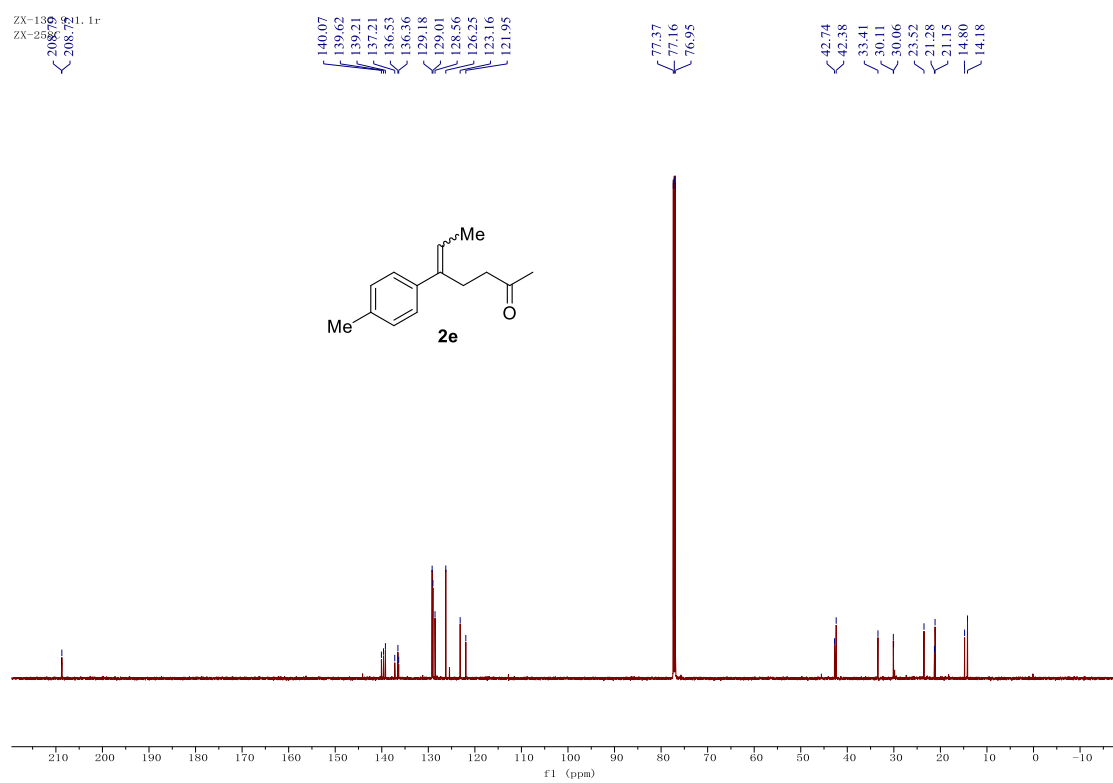

<sup>1</sup>H NMR (600 MHz, CDCl<sub>3</sub>) for **2f**

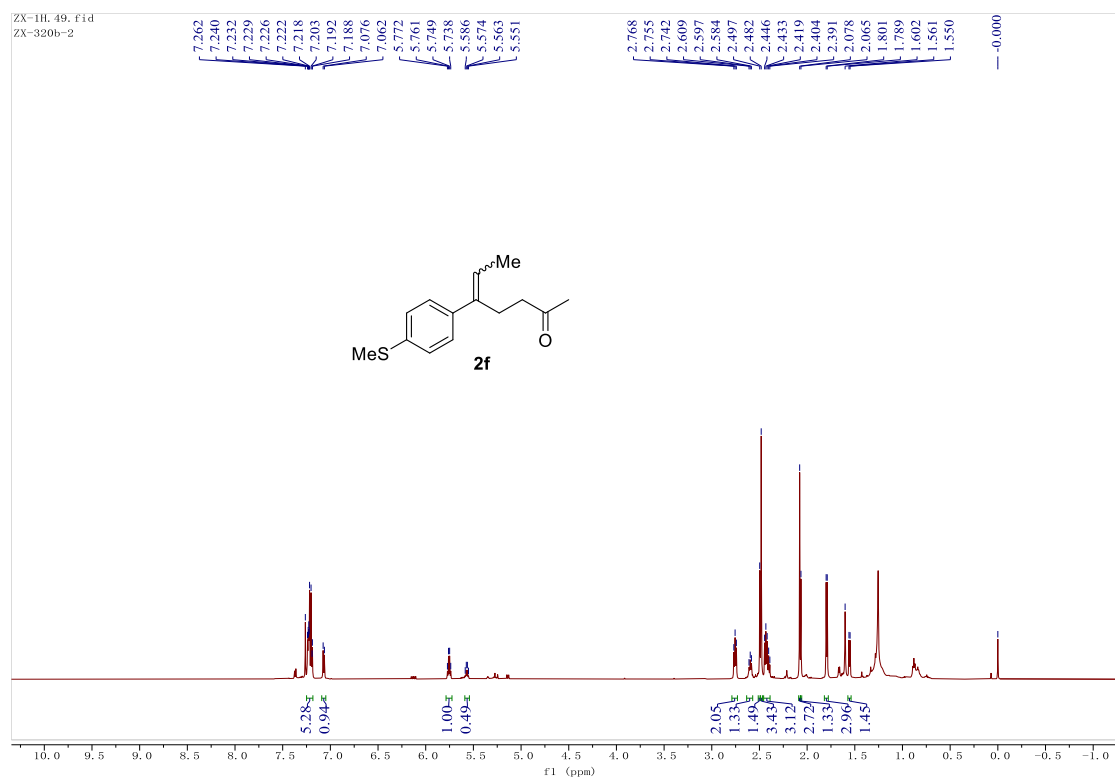

<sup>13</sup>C NMR (151 MHz, CDCl<sub>3</sub>) for **2f**

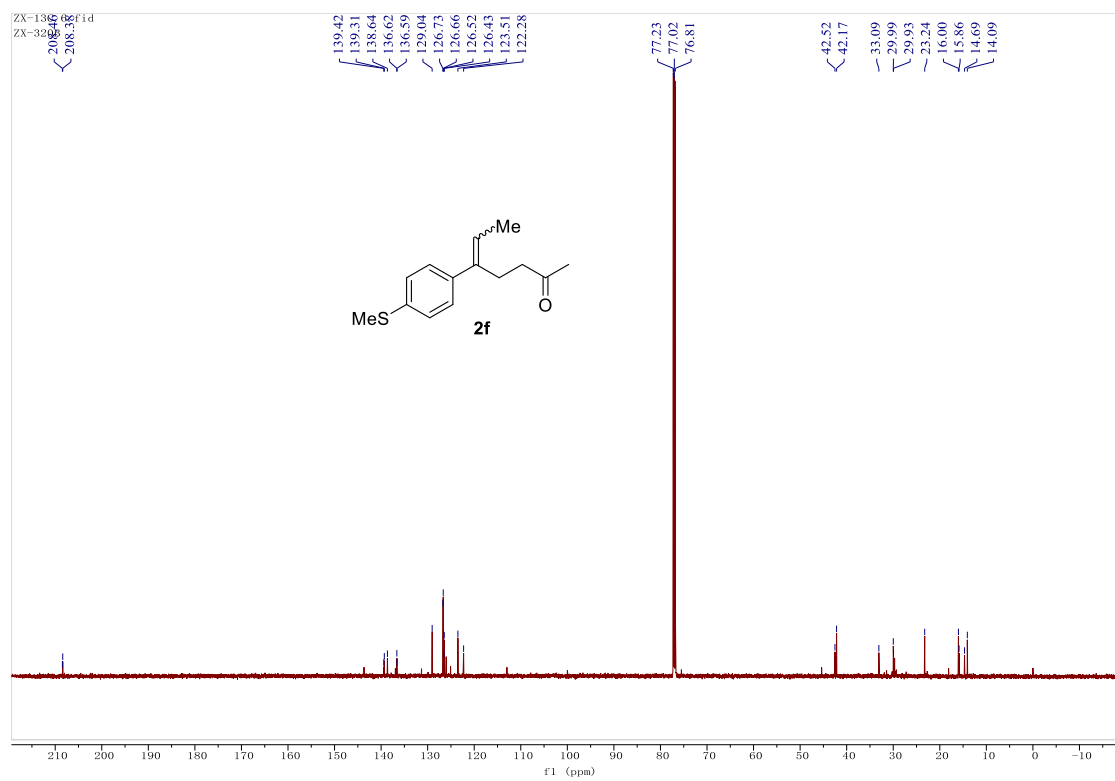



<sup>1</sup>H NMR (600 MHz, CDCl<sub>3</sub>) for **2g**

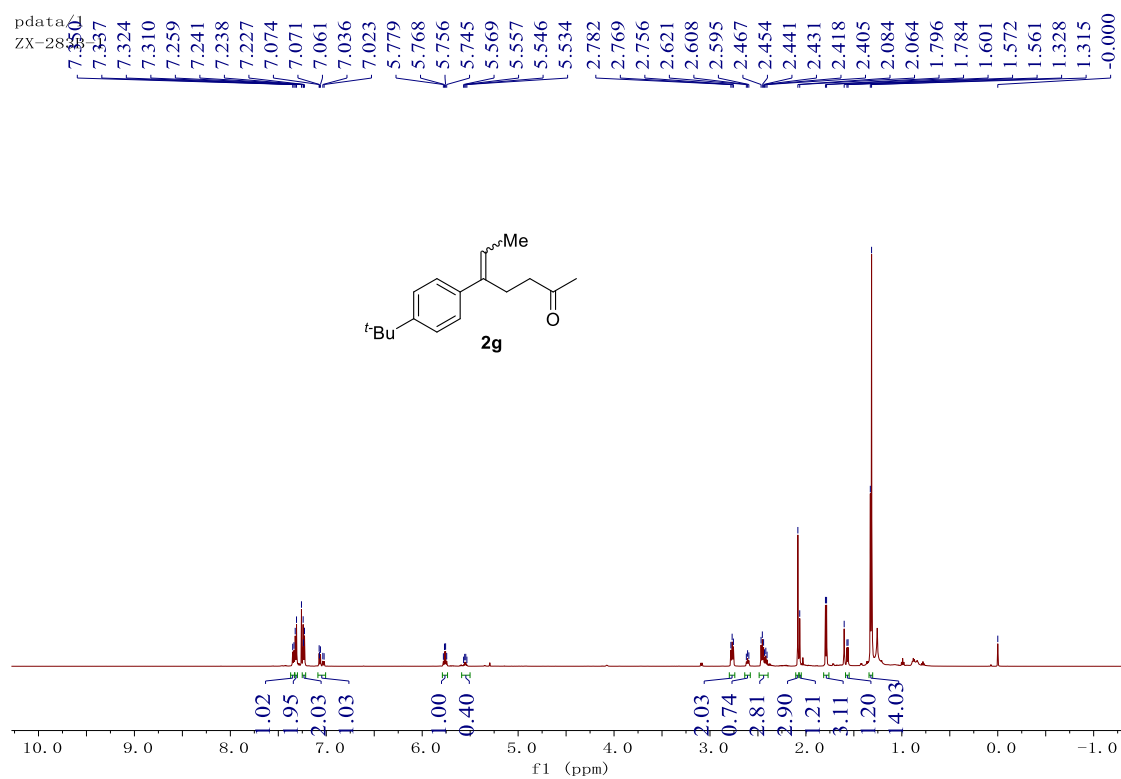

<sup>13</sup>C NMR (151 MHz, CDCl<sub>3</sub>) for **2g**

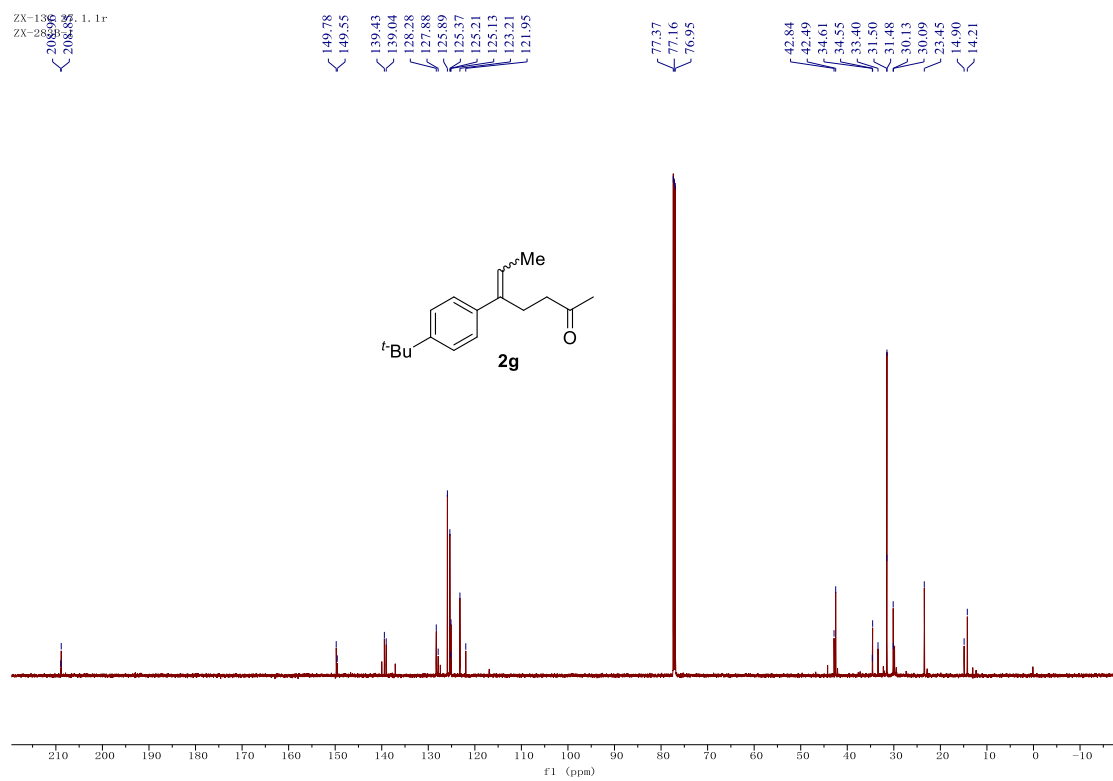

<sup>1</sup>H NMR (600 MHz, CDCl<sub>3</sub>) for **2h**

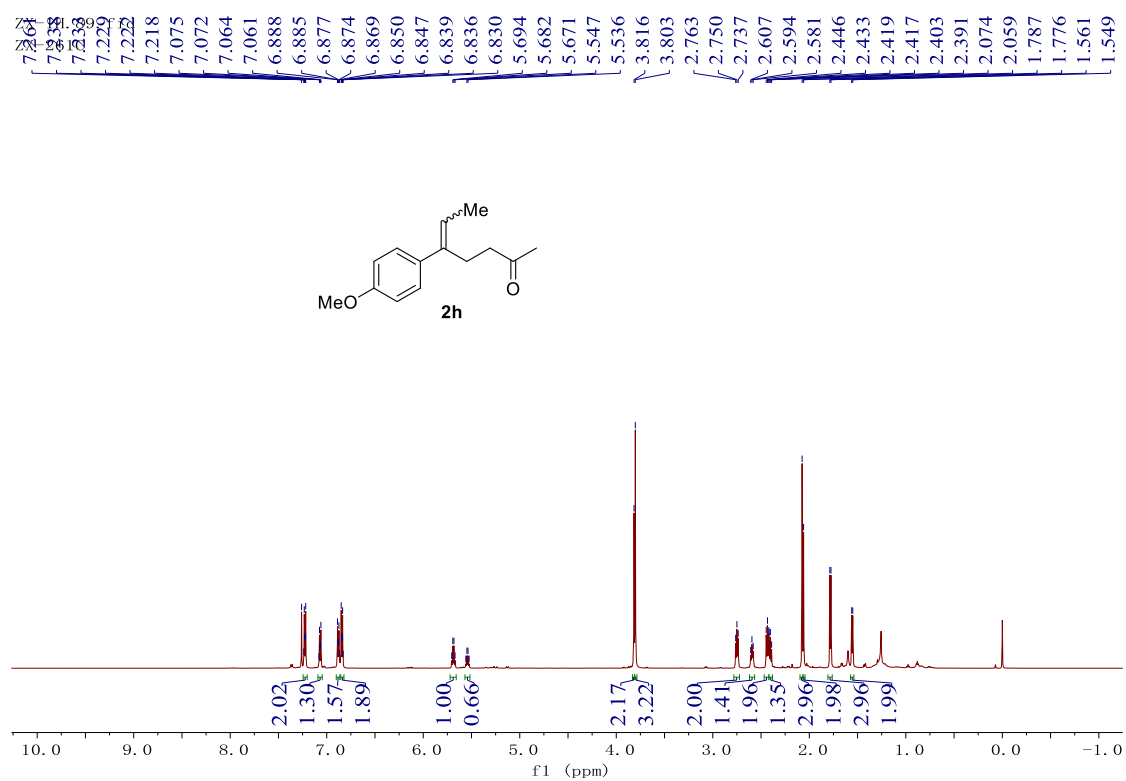

<sup>13</sup>C NMR (151 MHz, CDCl<sub>3</sub>) for **2h**

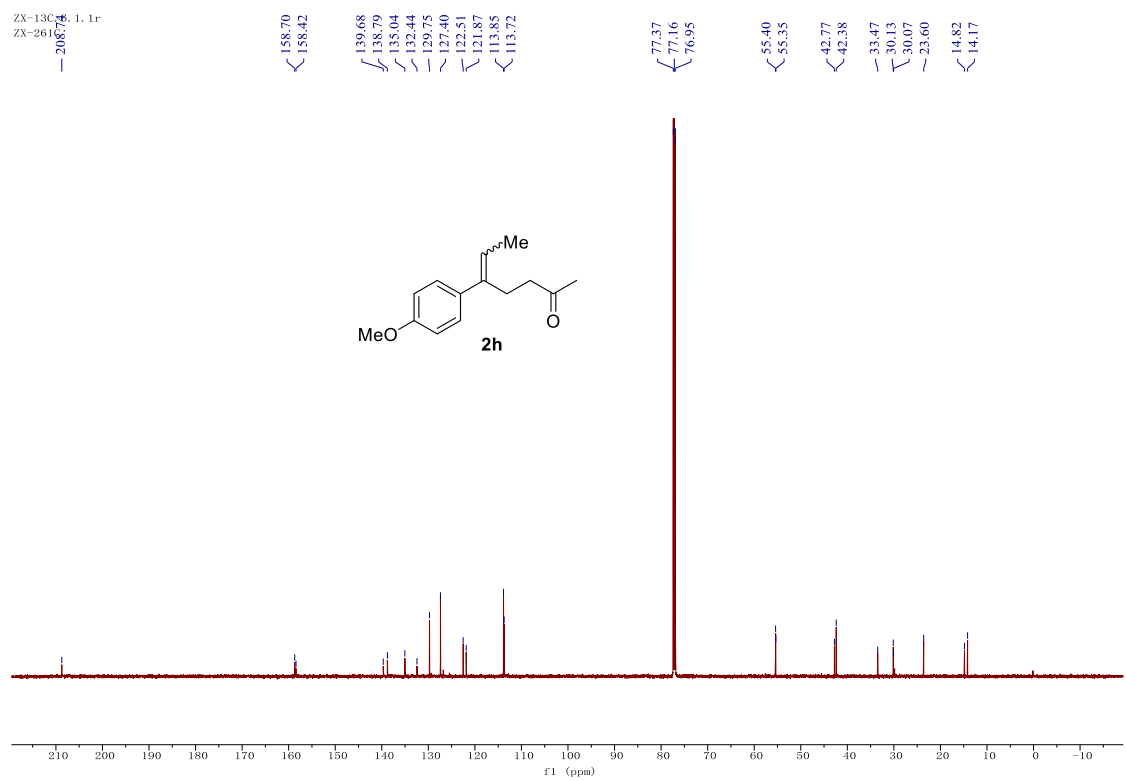

<sup>1</sup>H NMR (600 MHz, CDCl<sub>3</sub>) for **2i**

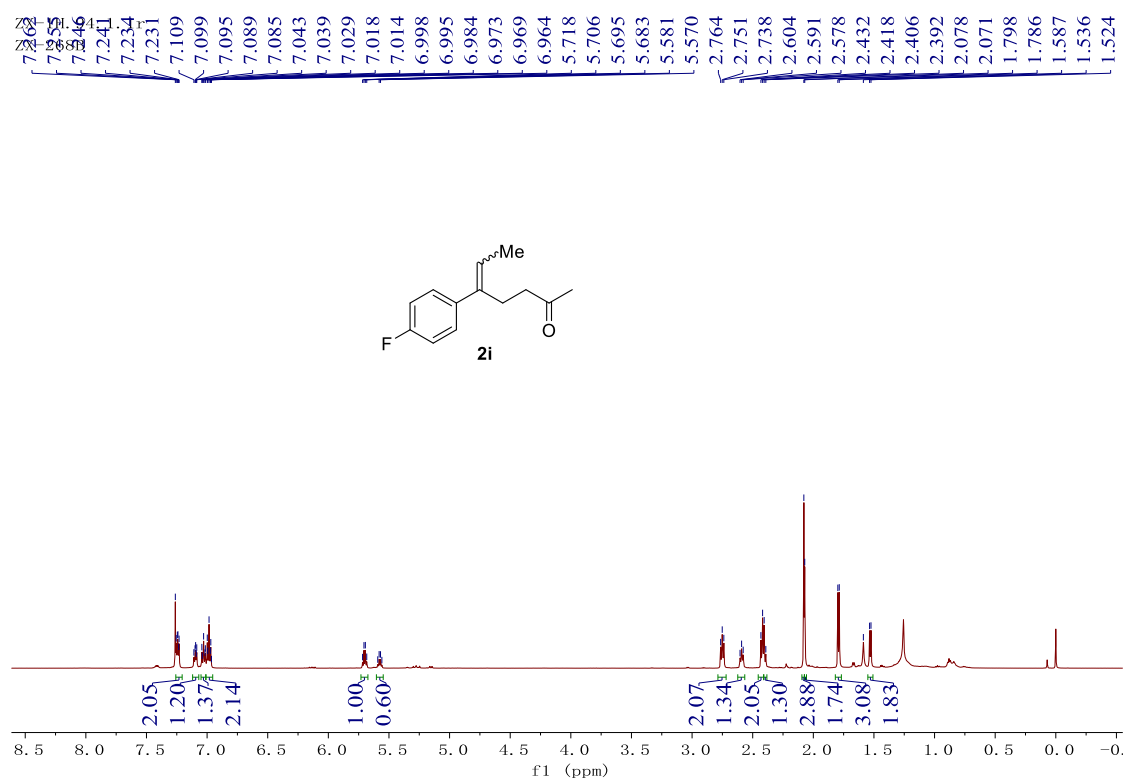

<sup>13</sup>C NMR (151 MHz, CDCl<sub>3</sub>) for **2i**

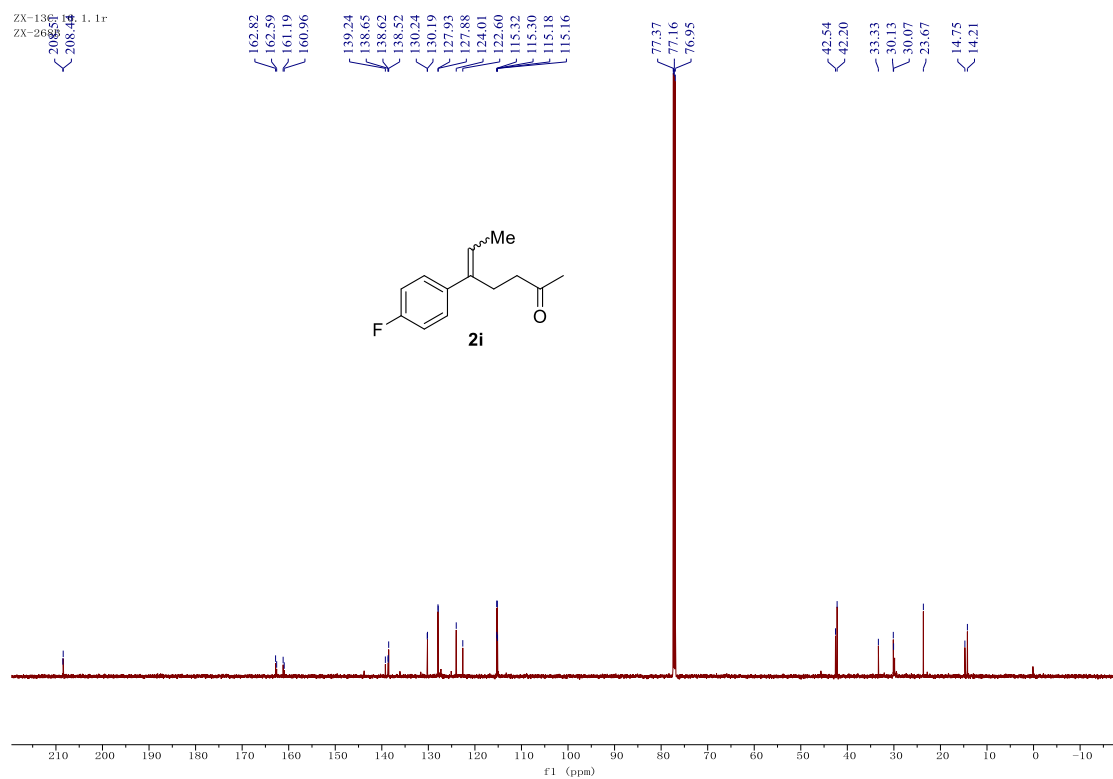

<sup>19</sup>F NMR (565 MHz, CDCl<sub>3</sub>) for **2i**

ZX-19F. 2. fid  
Zx-268B

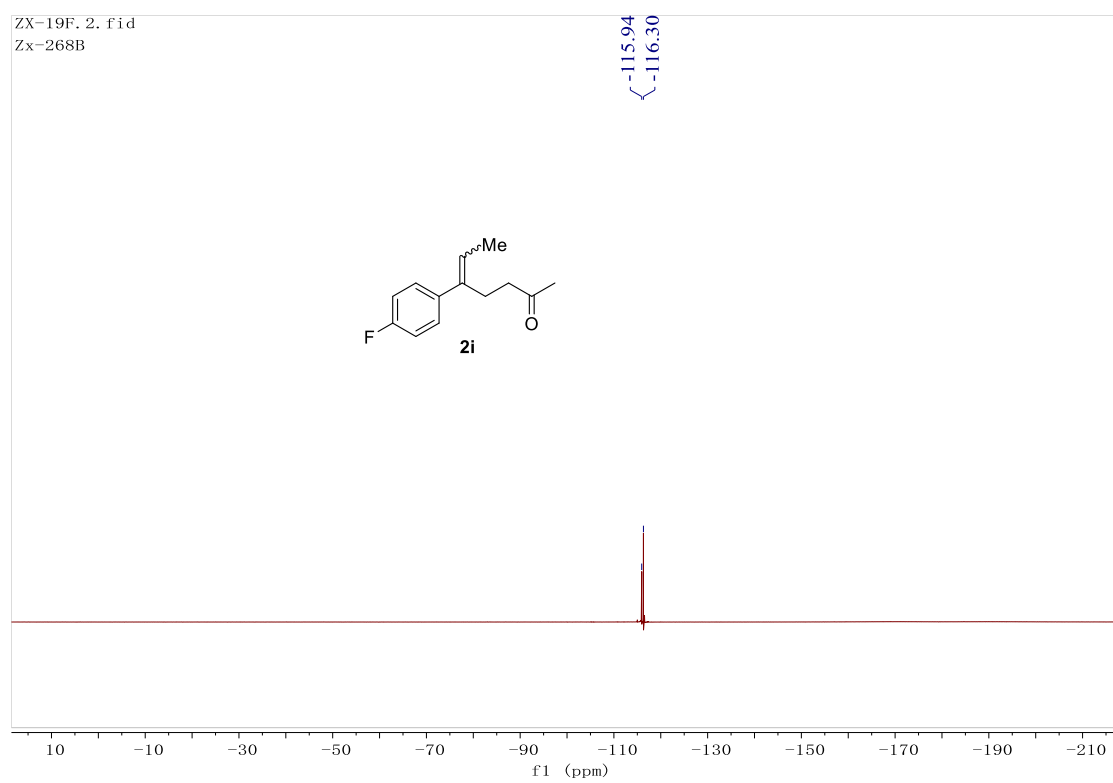

<sup>1</sup>H NMR (600 MHz, CDCl<sub>3</sub>) for **2j**

ZX-1H. 5. 1. 1r  
ZX-273C

7.609  
7.595  
7.559  
7.546  
7.399  
7.386  
5.856  
5.844  
5.833  
5.821  
5.660  
5.649  
5.637  
5.625  
2.811  
2.798  
2.785  
2.639  
2.626  
2.613  
2.442  
2.427  
2.415  
2.412  
2.400  
2.084  
2.080  
1.840  
1.828  
1.546  
1.534

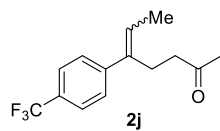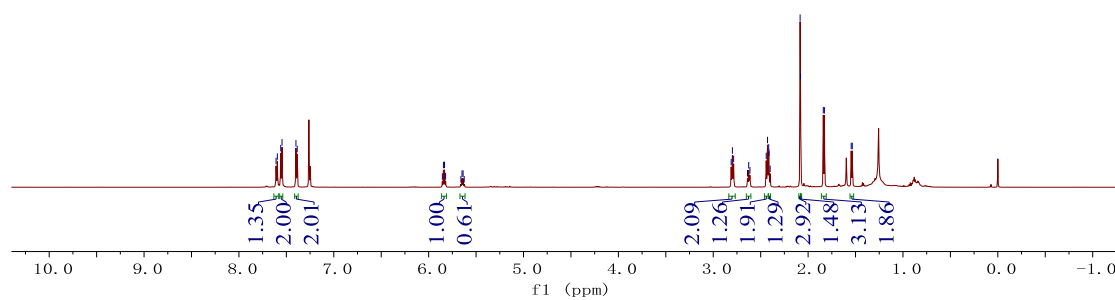

<sup>13</sup>C NMR (151 MHz, CDCl<sub>3</sub>) for **2j**

ZX-13C. 18. 1. 1r  
ZX-273C

208.18  
207.36  
146.18  
144.28  
139.09  
138.53  
129.16  
129.04  
128.94  
128.83  
126.62  
126.13  
125.49  
125.47  
125.44  
125.42  
125.39  
125.36  
125.33  
125.31  
123.51  
77.37  
77.16  
76.95  
42.37  
42.09  
32.94  
30.11  
30.07  
23.31  
14.76  
14.34

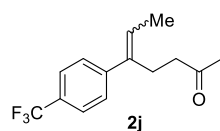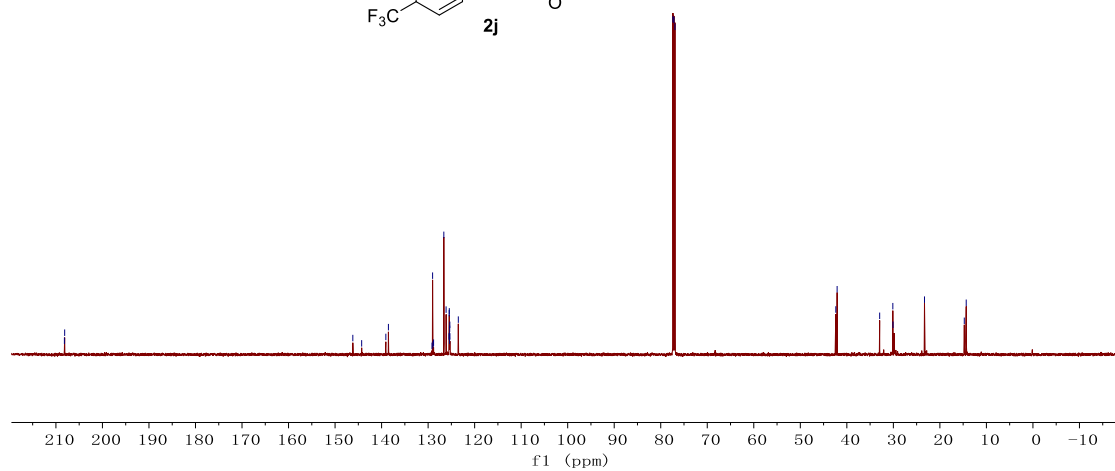

<sup>19</sup>F NMR (565 MHz, CDCl<sub>3</sub>) for **2i**

ZX-19F. 1. fid  
Zx-273C

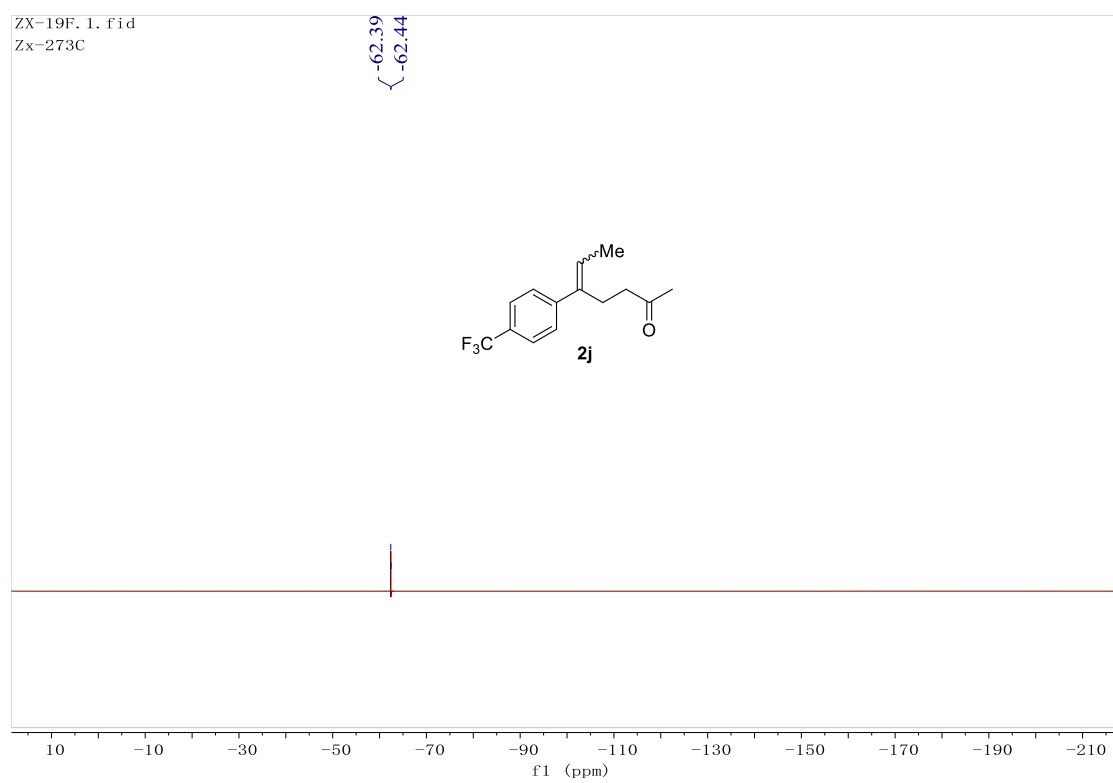

<sup>1</sup>H NMR (600 MHz, CDCl<sub>3</sub>) for **2k**

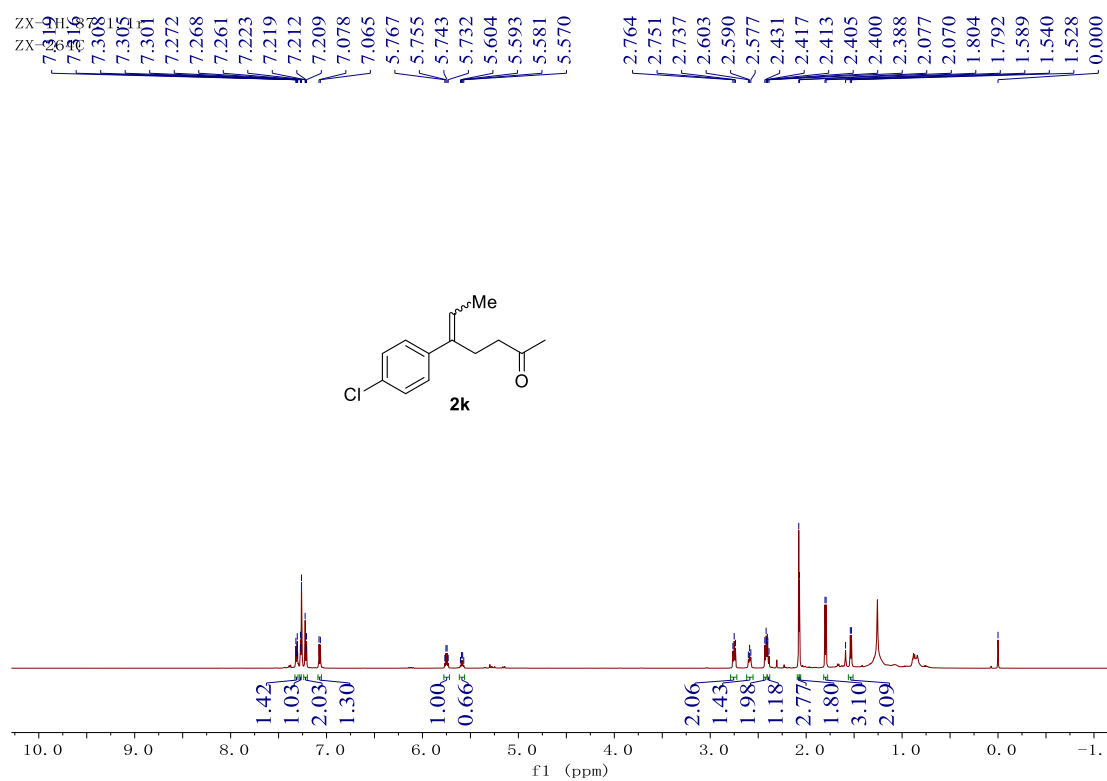

<sup>13</sup>C NMR (151 MHz, CDCl<sub>3</sub>) for **2k**

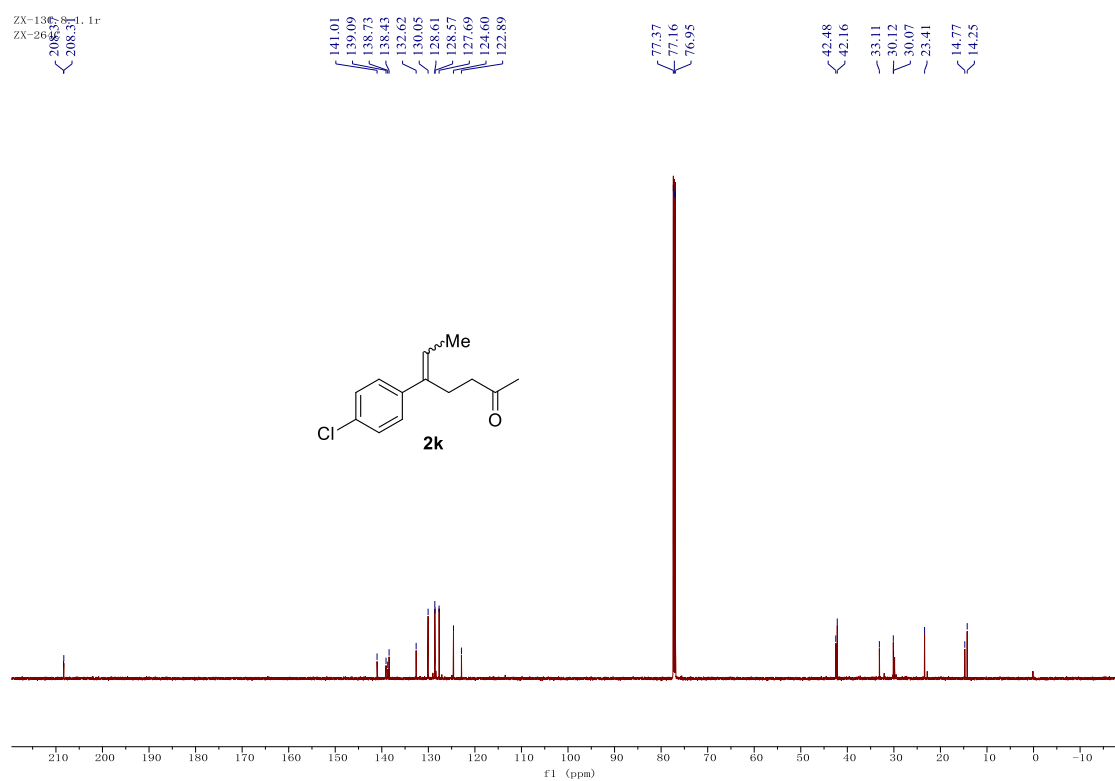

<sup>1</sup>H NMR (600 MHz, CDCl<sub>3</sub>) for **21**

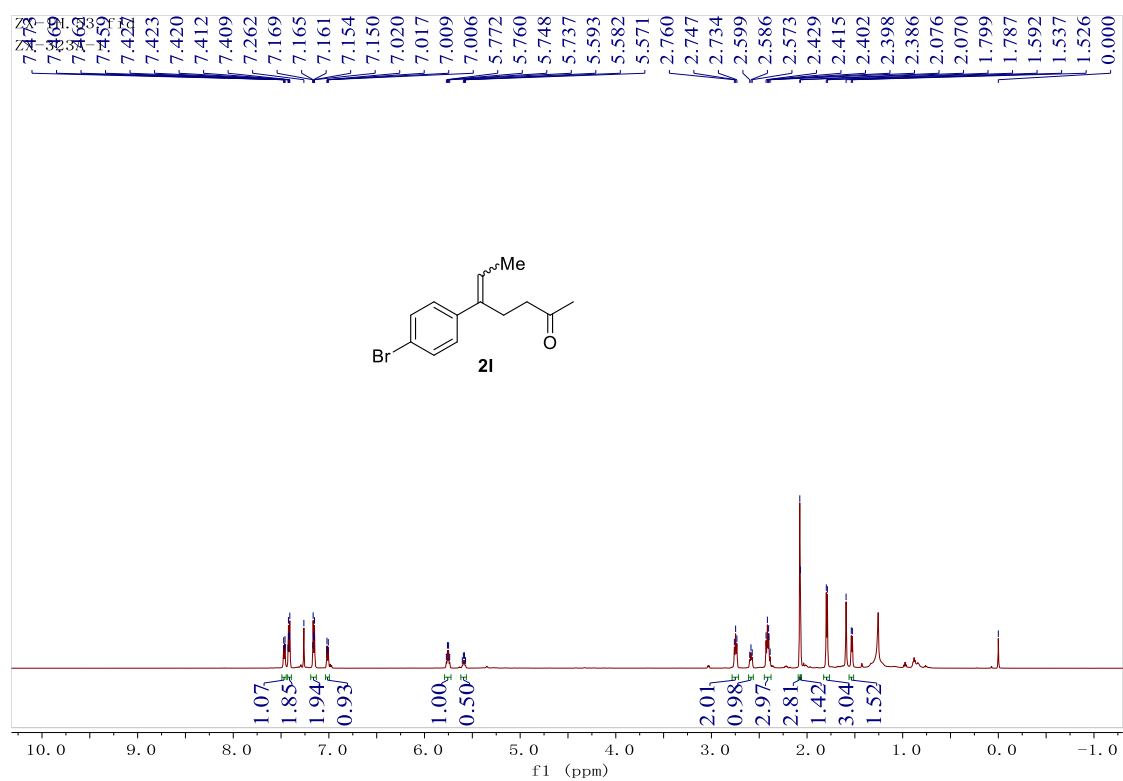

<sup>13</sup>C NMR (151 MHz, CDCl<sub>3</sub>) for **21**

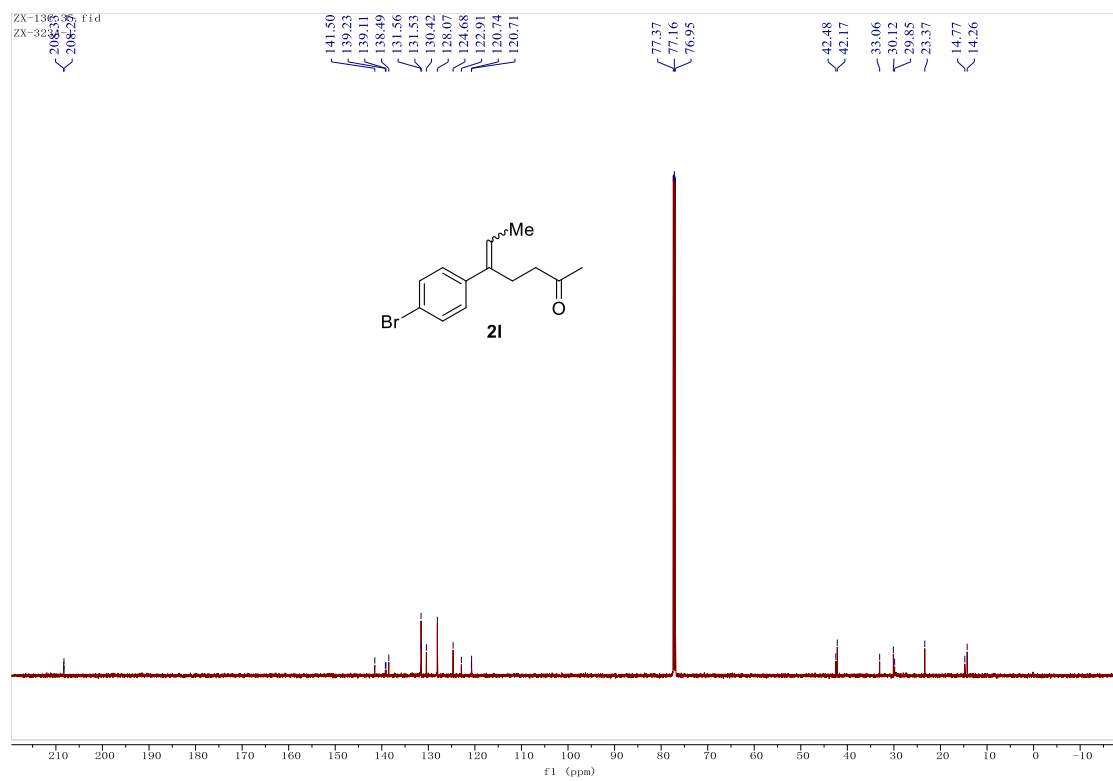



<sup>1</sup>H NMR (600 MHz, CDCl<sub>3</sub>) for **2m**

7.618  
7.604  
7.609  
7.587  
7.582  
7.569  
7.549  
7.535  
7.453  
7.442  
7.431  
7.418  
7.382  
7.369  
7.352  
7.343  
7.332  
7.252  
7.224  
7.212  
5.860  
5.849  
5.838  
5.619  
5.607  
2.831  
2.818  
2.804  
2.669  
2.656  
2.644  
2.499  
2.486  
2.472  
2.466  
2.452  
2.439  
2.094  
2.079  
1.835  
1.824  
1.613  
1.601  
1.586  
0.000

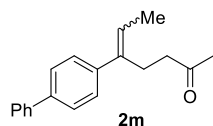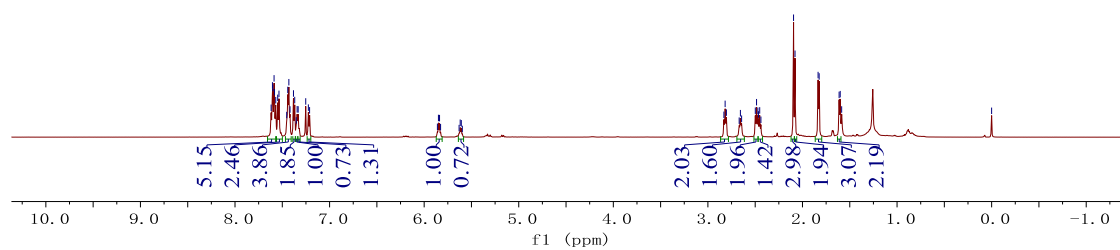

<sup>13</sup>C NMR (151 MHz, CDCl<sub>3</sub>) for **2m**

ZX 208.74  
ZX 208.68  
14.1, 1r

141.43  
140.97  
140.88  
139.78  
139.69  
139.61  
139.26  
138.97  
129.11  
128.90  
127.36  
127.33  
127.18  
127.12  
127.06  
127.01  
126.71  
124.04  
122.49  
77.37  
77.16  
76.95  
42.73  
42.38  
33.28  
30.15  
30.10  
23.42  
14.91  
14.29

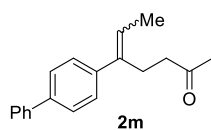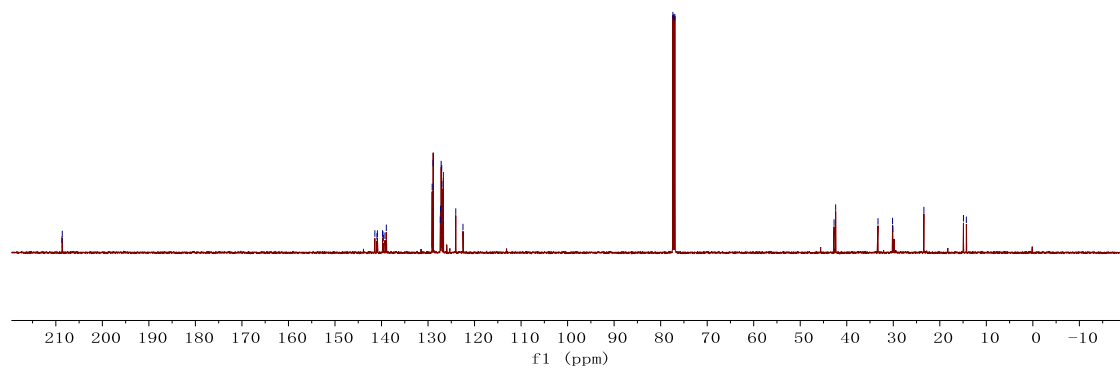

<sup>1</sup>H NMR (600 MHz, CDCl<sub>3</sub>) for **2n**

ZX-1H. 1. 1. 1r  
ZX-271C

7.263  
6.445  
6.442  
6.368  
6.364  
6.359  
6.285  
6.281  
5.788  
5.776  
5.765  
5.753  
5.559  
5.548  
5.536  
5.525  
3.791  
2.748  
2.735  
2.722  
2.580  
2.567  
2.462  
2.449  
2.441  
2.436  
2.428  
2.416  
2.080  
2.074  
1.796  
1.785  
1.635  
1.570  
1.559  
0.000

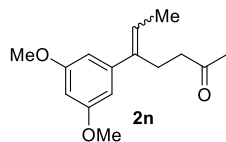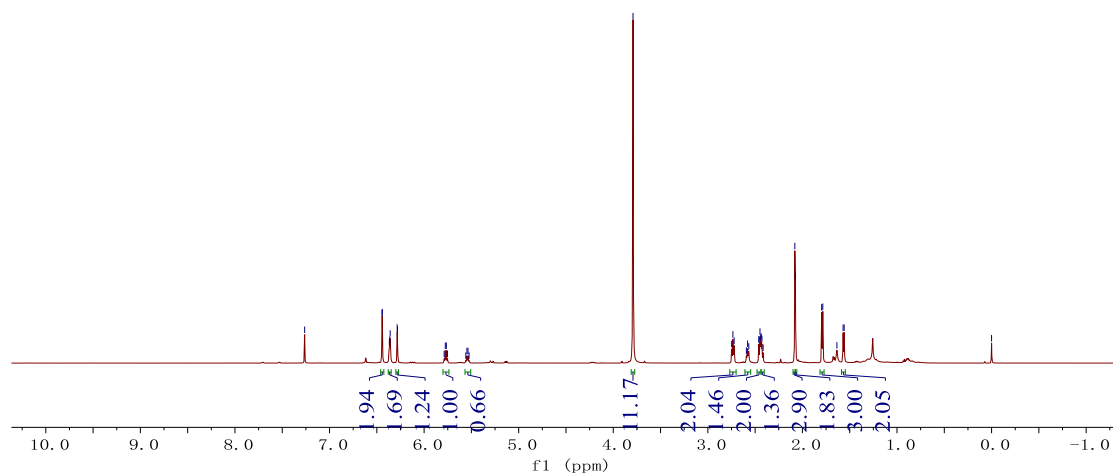

<sup>13</sup>C NMR (151 MHz, CDCl<sub>3</sub>) for **2n**

ZX-13C. 17. 1. 1r  
ZX-208661

208.79  
208.61  
160.84  
160.74  
144.95  
142.50  
140.23  
139.51  
124.07  
122.26  
106.78  
104.82  
98.79  
98.67  
77.37  
77.16  
76.95  
55.44  
55.42  
42.61  
42.29  
33.25  
30.13  
30.09  
23.62  
14.83  
14.15

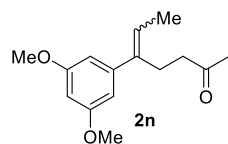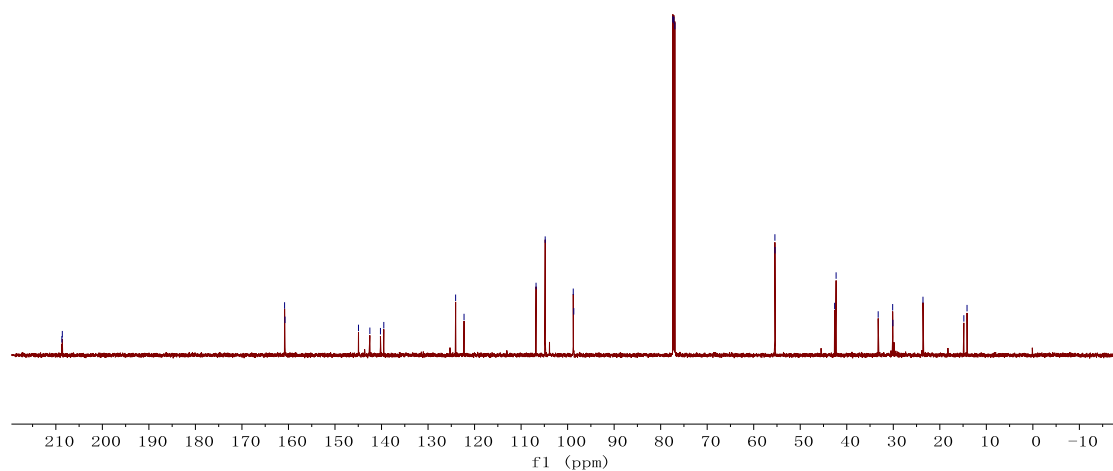

<sup>1</sup>H NMR (600 MHz, CDCl<sub>3</sub>) for **2o**

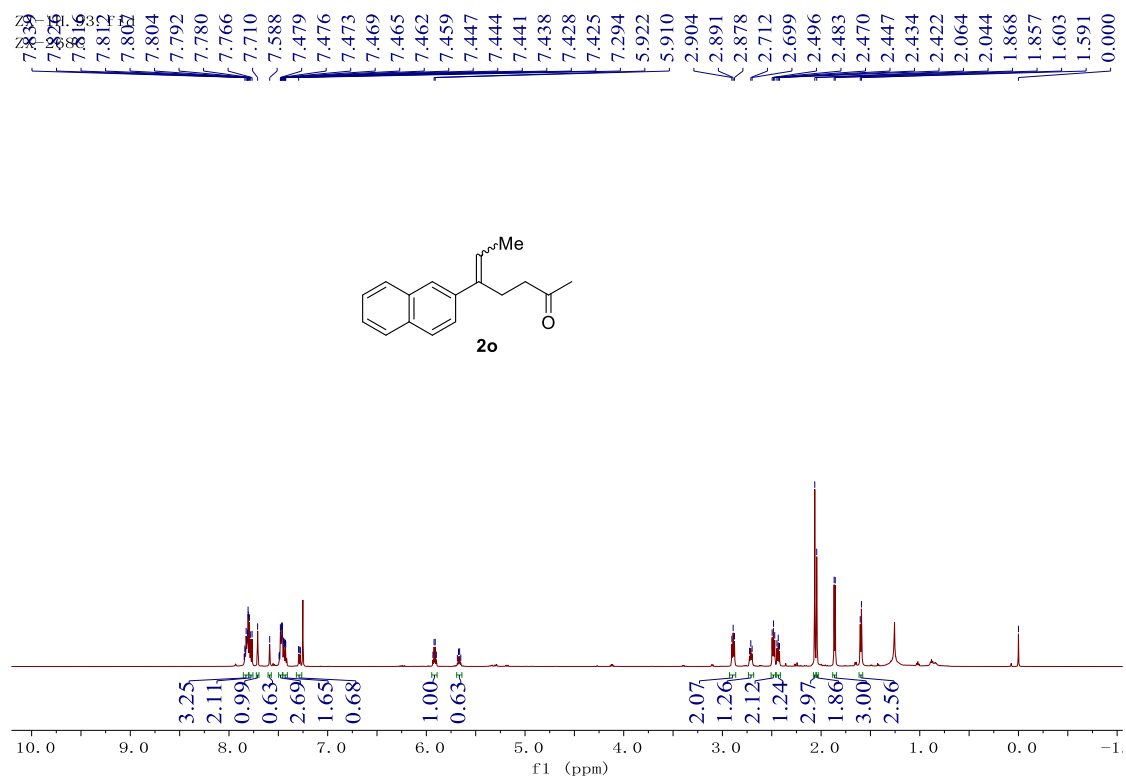

<sup>13</sup>C NMR (151 MHz, CDCl<sub>3</sub>) for **2o**

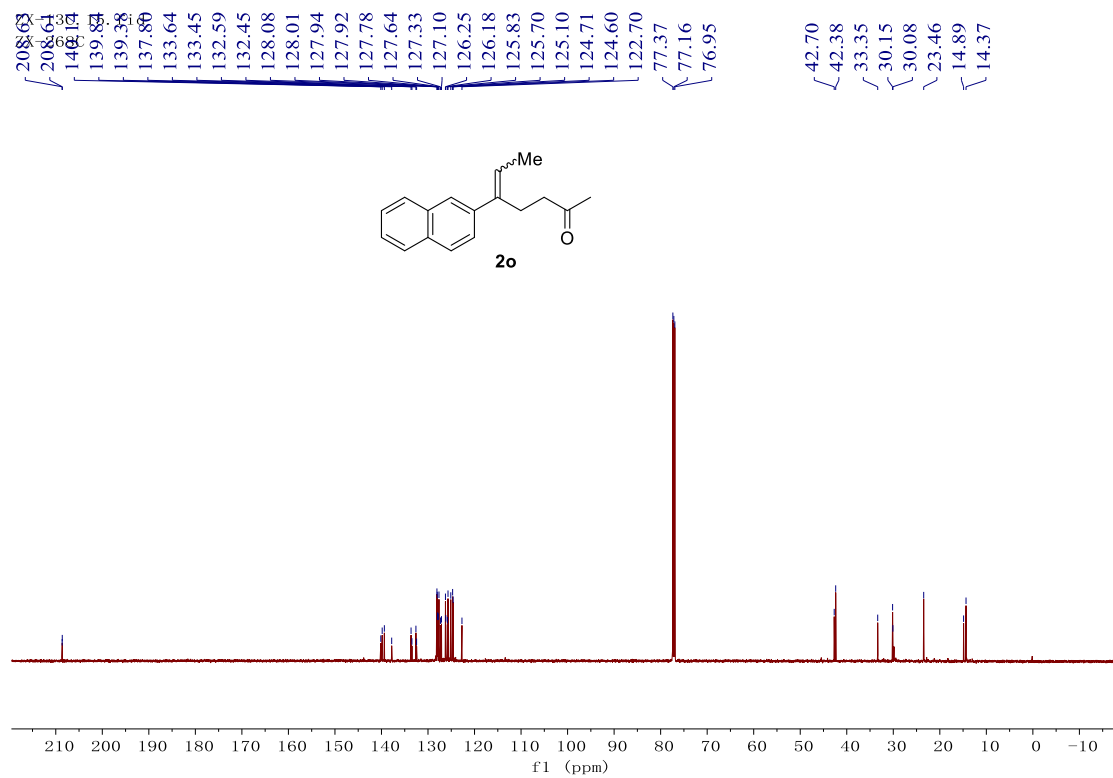

<sup>1</sup>H NMR (600 MHz, CDCl<sub>3</sub>) for **2p**

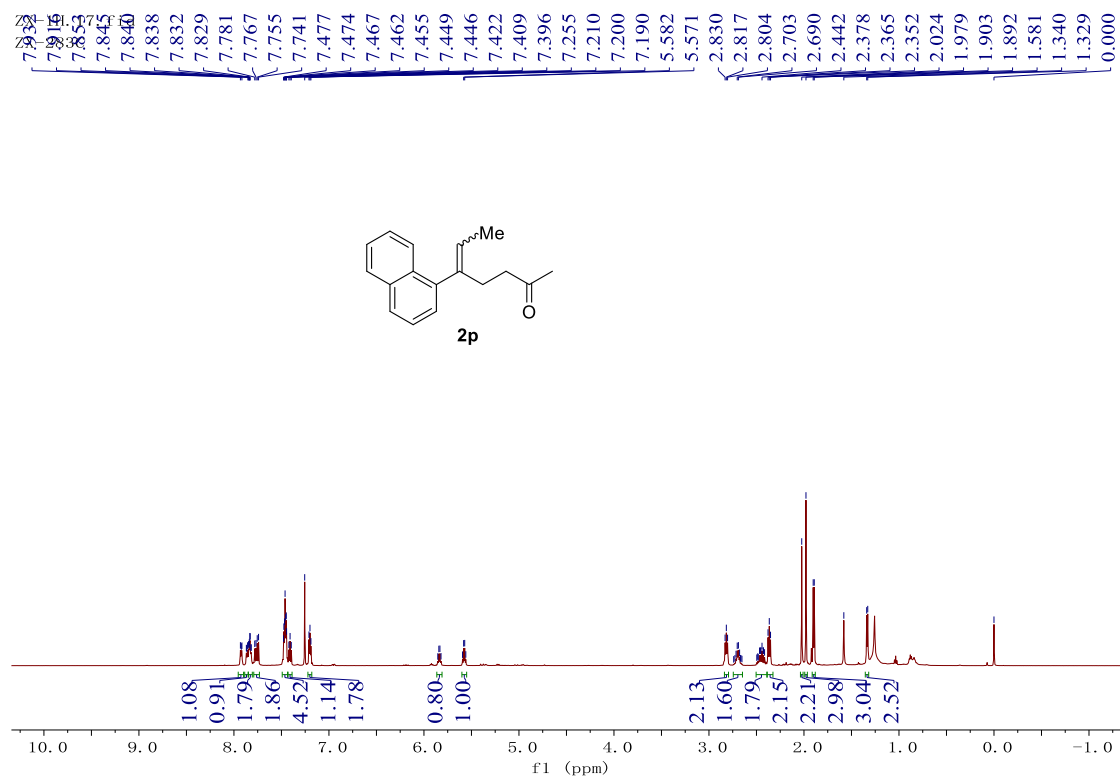

<sup>13</sup>C NMR (151 MHz, CDCl<sub>3</sub>) for **2p**

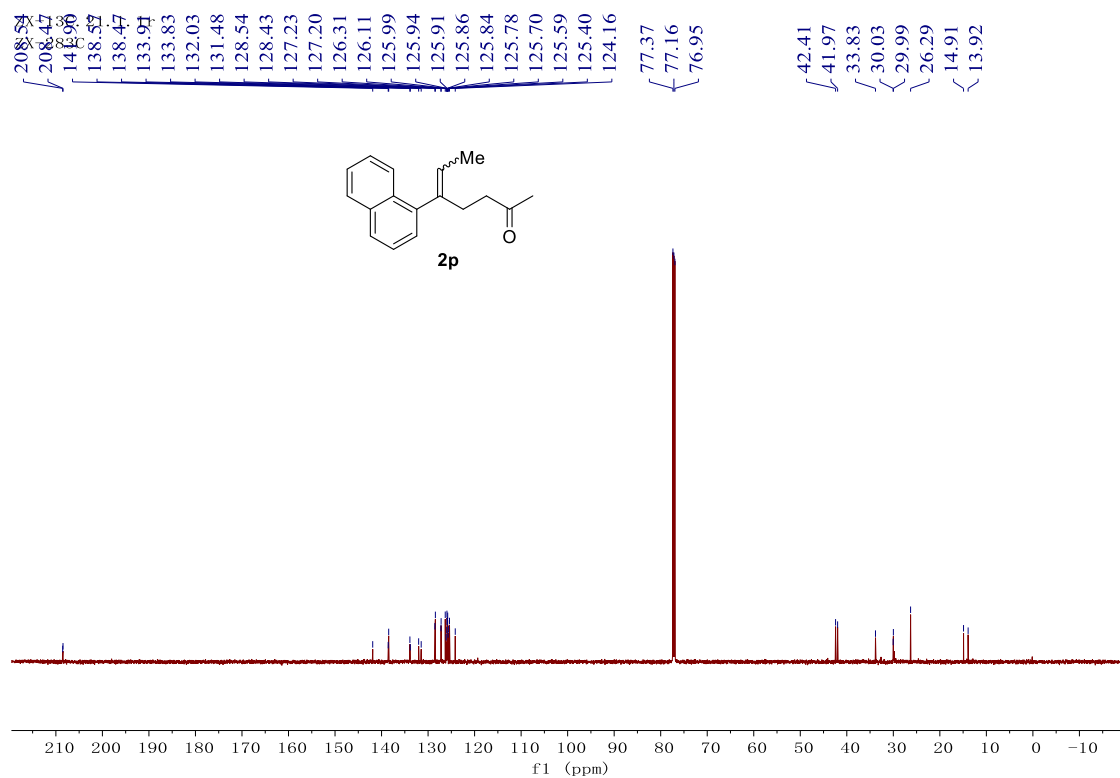

<sup>1</sup>H NMR (600 MHz, CDCl<sub>3</sub>) for **2q**

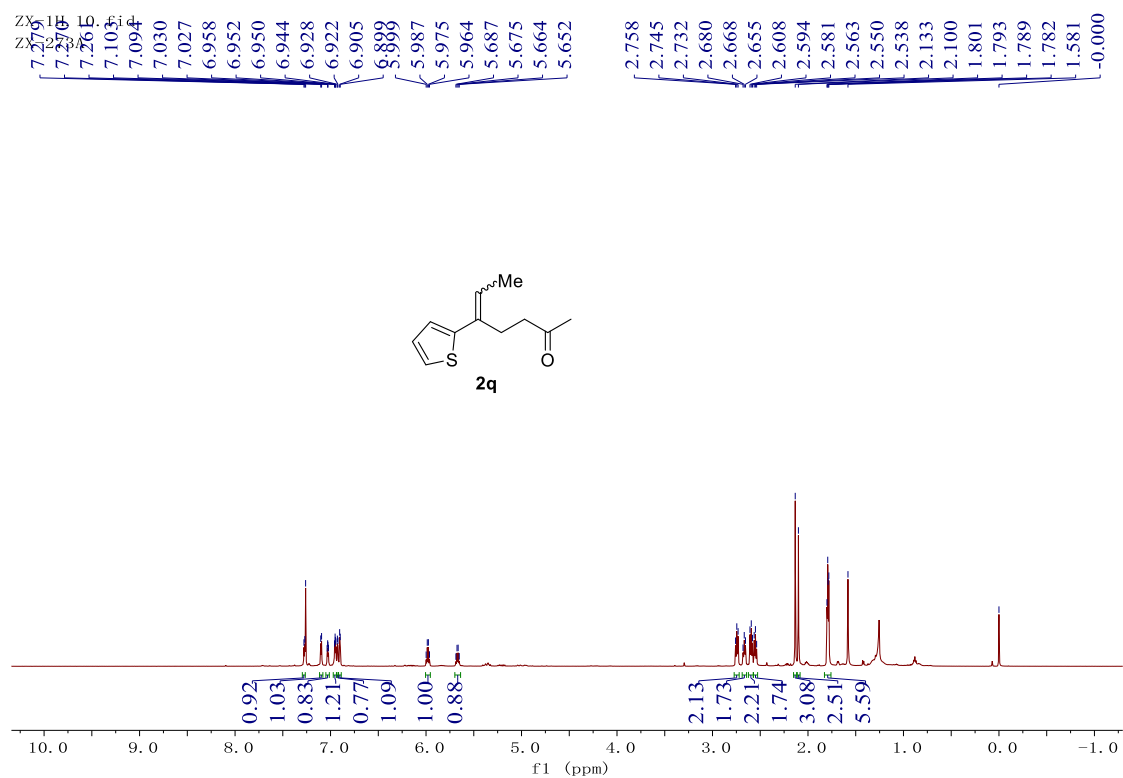

<sup>13</sup>C NMR (151 MHz, CDCl<sub>3</sub>) for **2q**

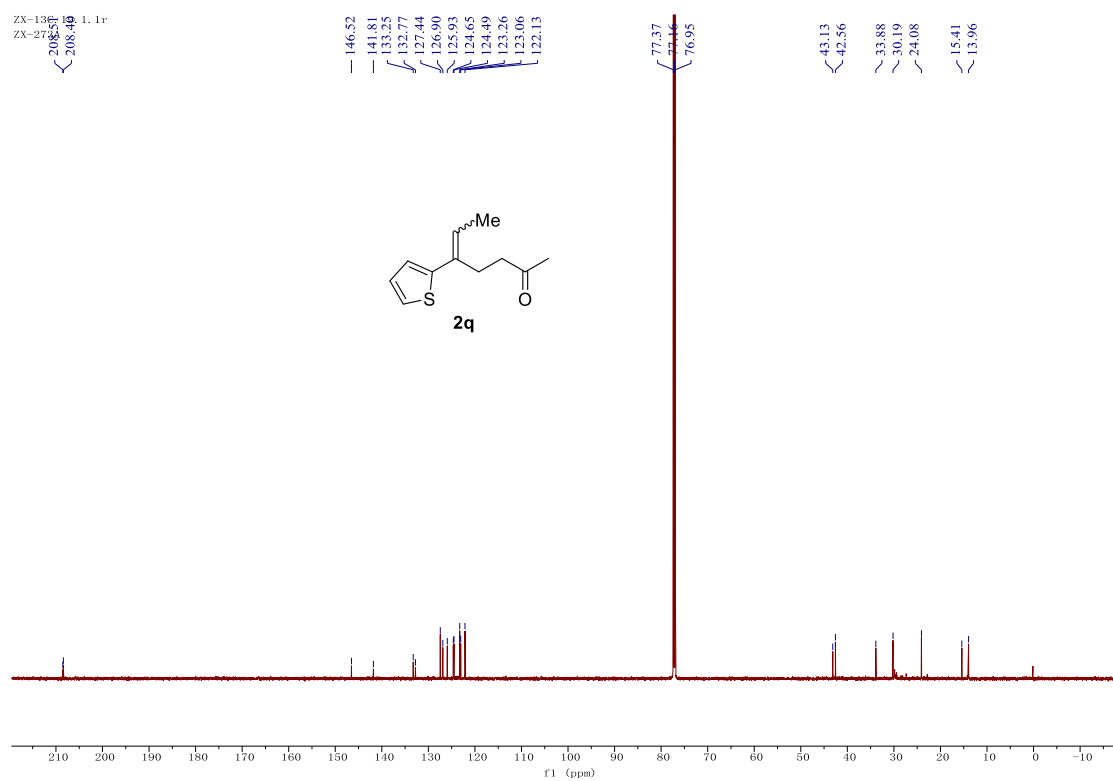

<sup>1</sup>H NMR (600 MHz, CDCl<sub>3</sub>) for **2r**

ZX-1H\_13\_1\_1r  
ZX-273B-3

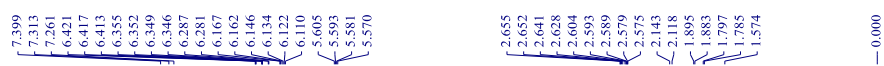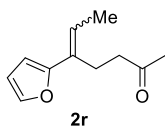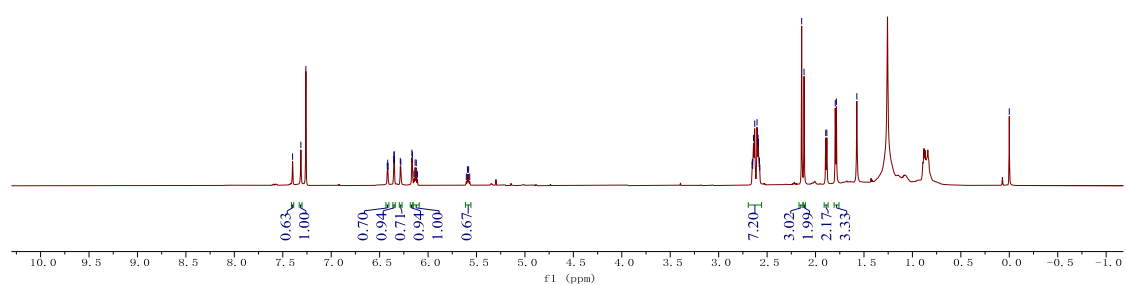

<sup>13</sup>C NMR (151 MHz, CDCl<sub>3</sub>) for **2r**

ZX-13C\_24\_1\_1r  
ZX-208B-3

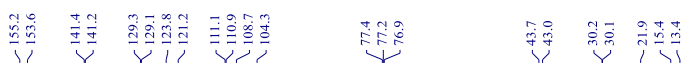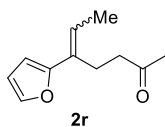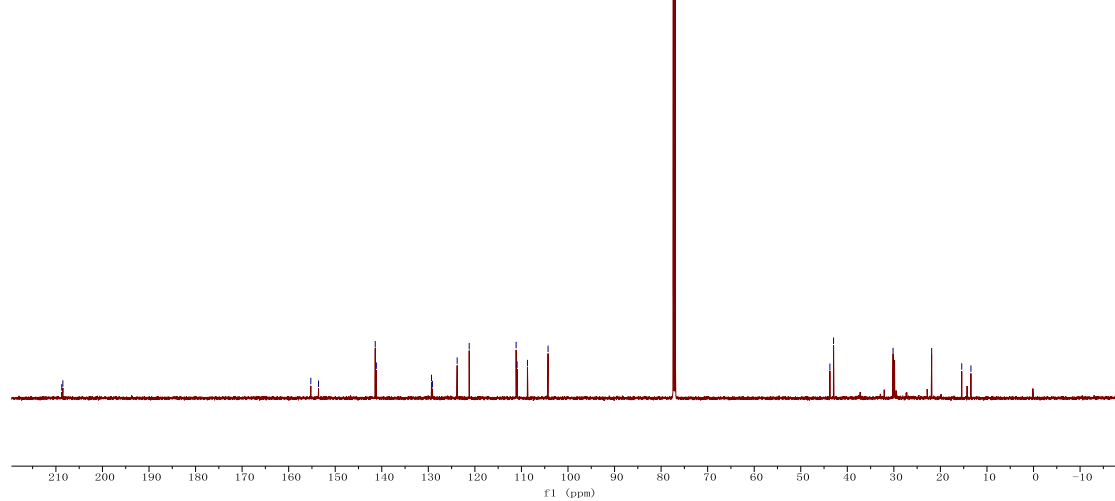

<sup>1</sup>H NMR (400 MHz, CDCl<sub>3</sub>) for **2s**

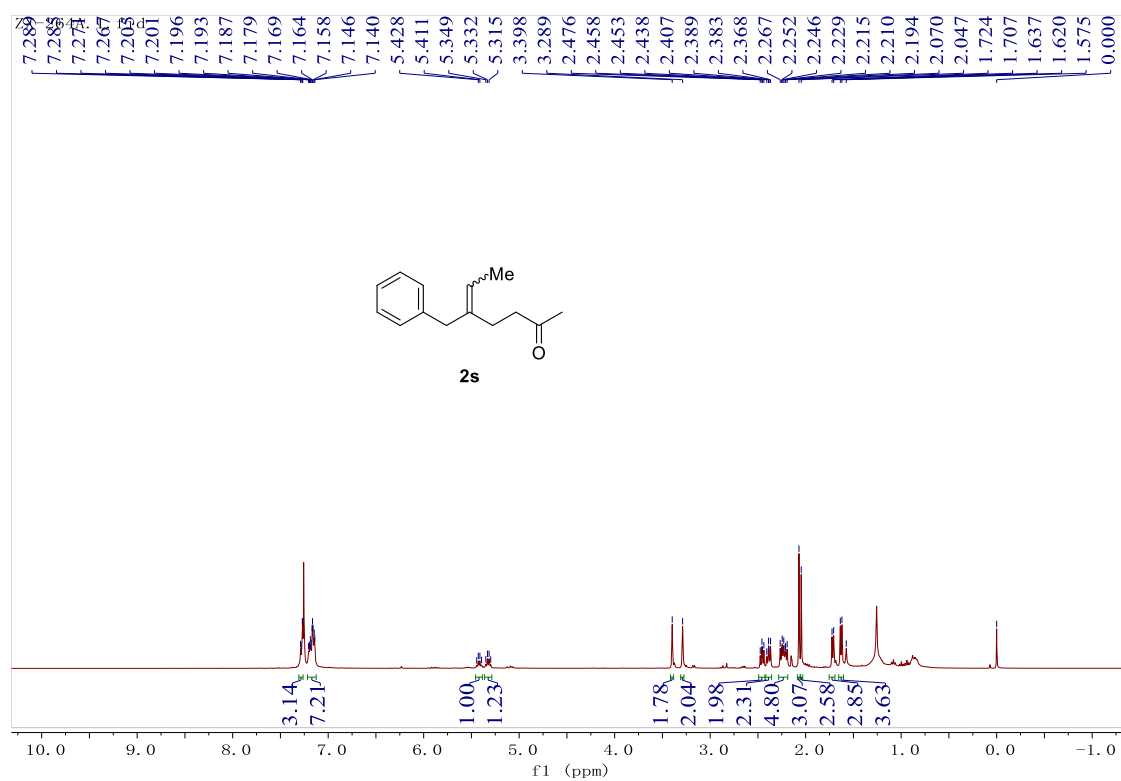

<sup>13</sup>C NMR (151 MHz, CDCl<sub>3</sub>) for **2s**

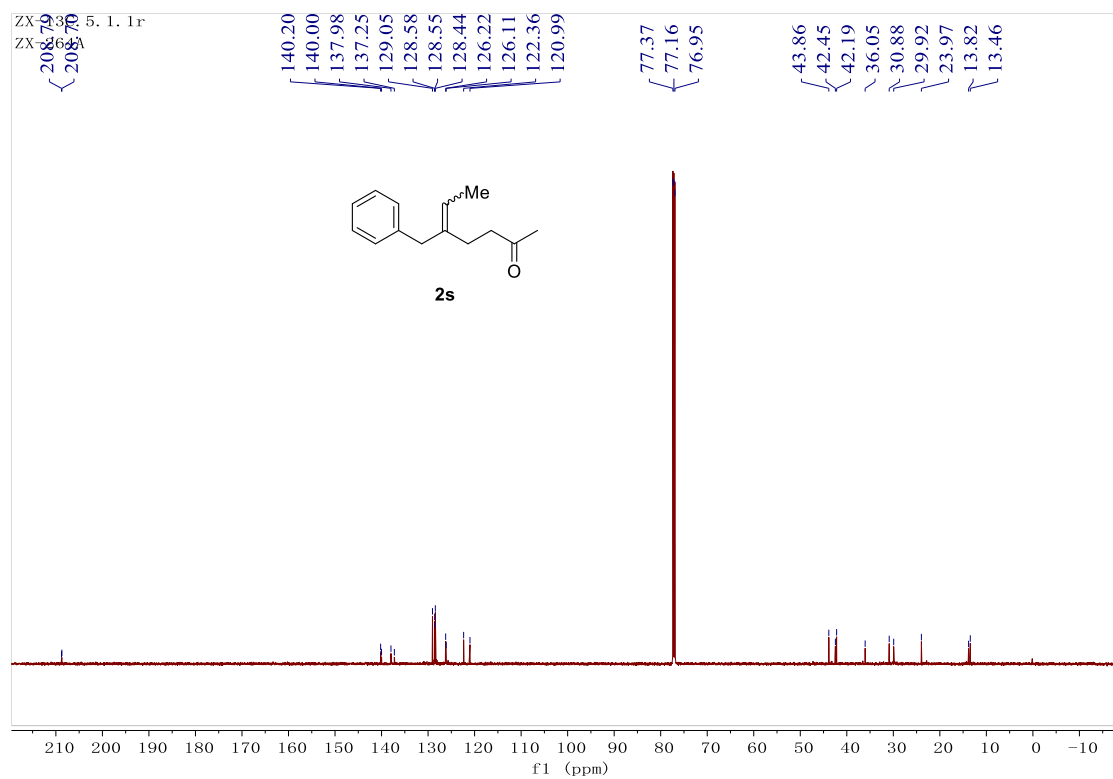

<sup>1</sup>H NMR (600 MHz, CDCl<sub>3</sub>) for **2t**

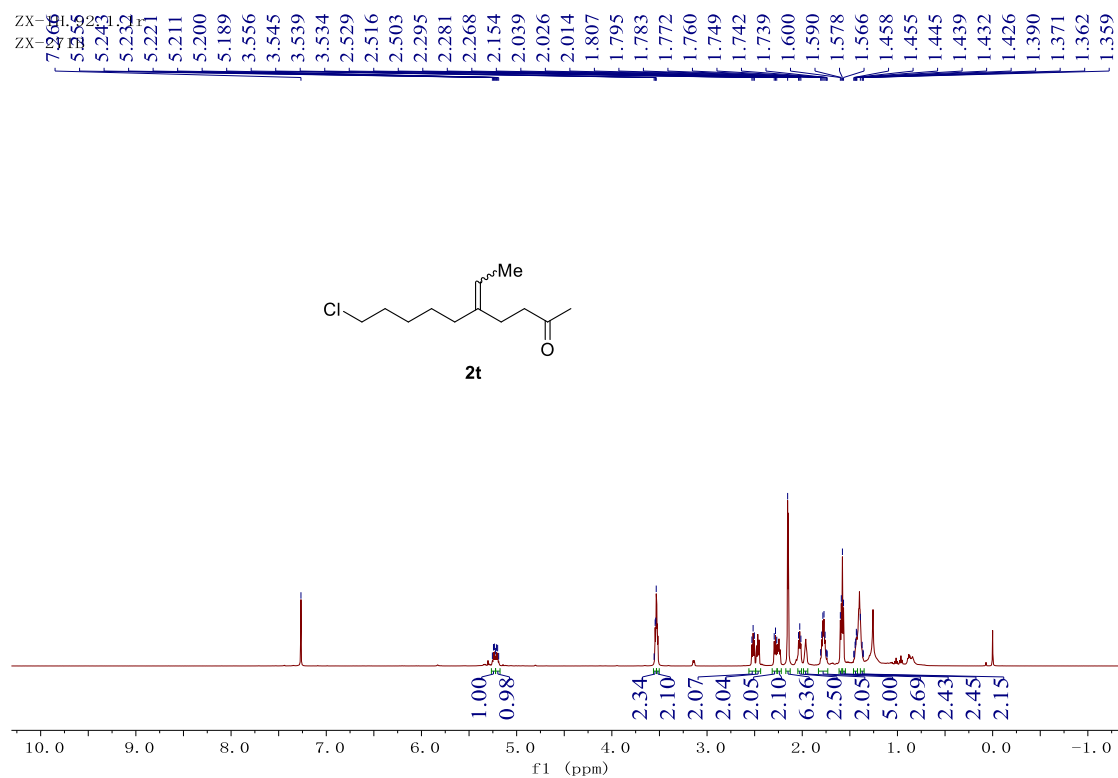

<sup>13</sup>C NMR (151 MHz, CDCl<sub>3</sub>) for **2t**

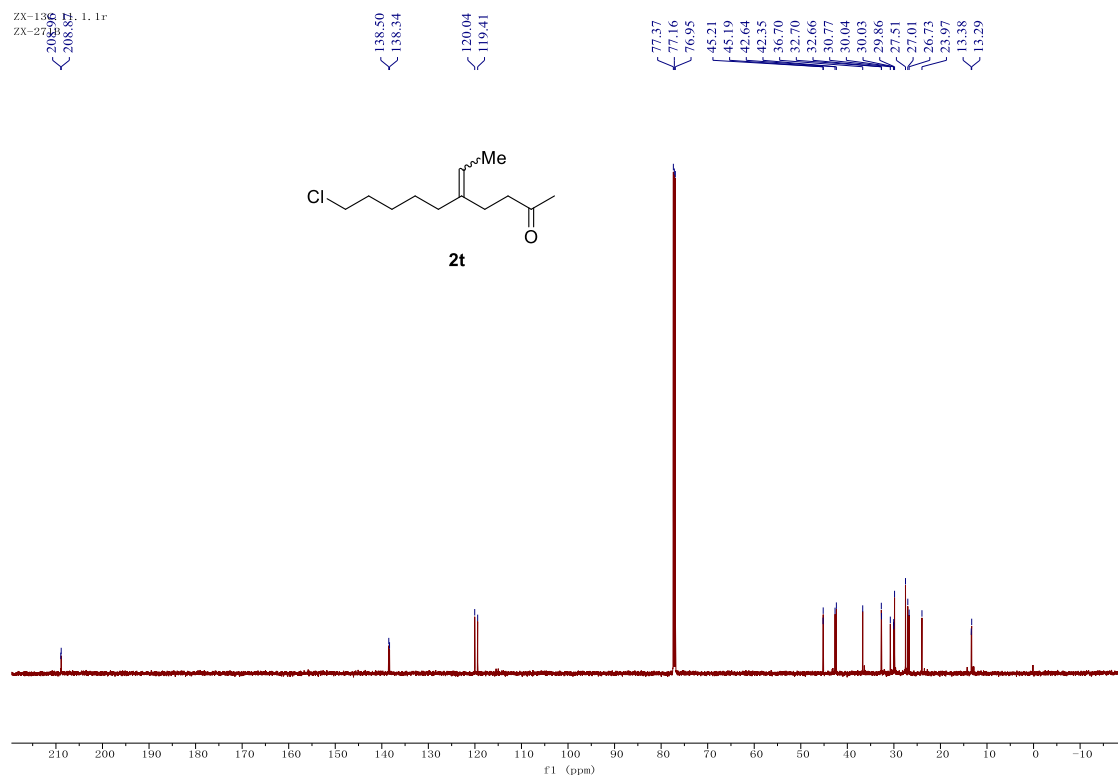



<sup>1</sup>H NMR (600 MHz, CDCl<sub>3</sub>) for **2u**

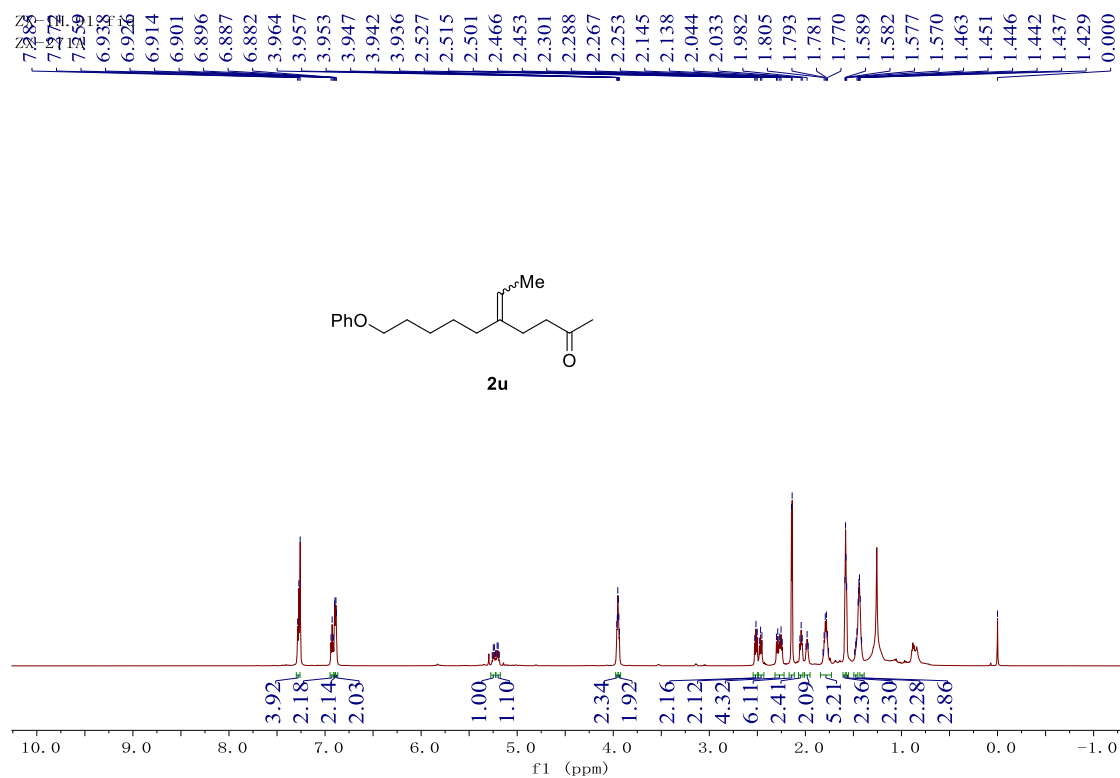

<sup>13</sup>C NMR (151 MHz, CDCl<sub>3</sub>) for **2u**

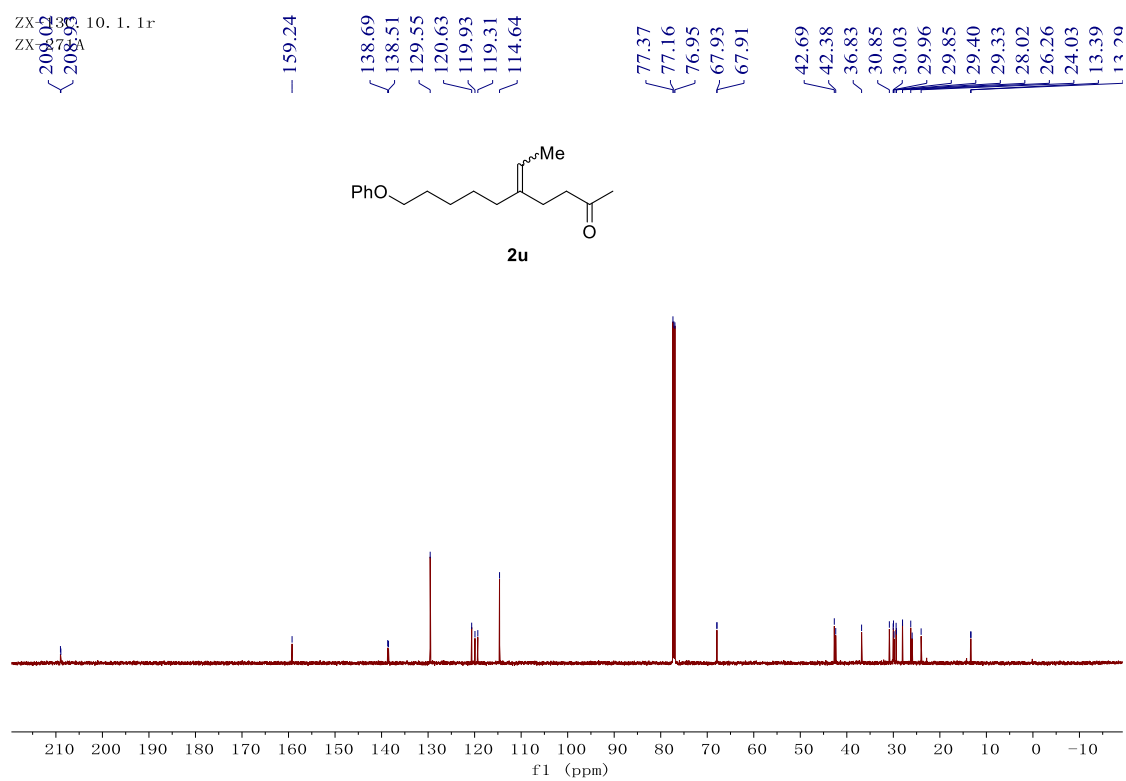

<sup>1</sup>H NMR (600 MHz, CDCl<sub>3</sub>) for **2v**

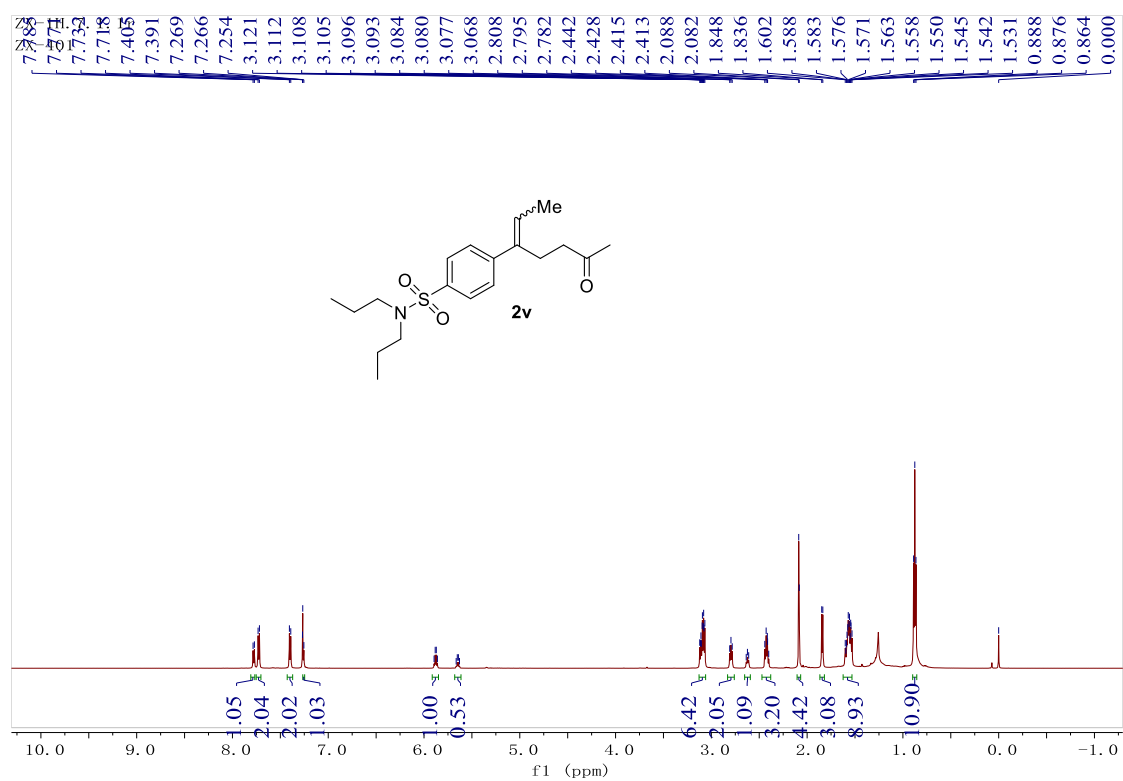

<sup>13</sup>C NMR (151 MHz, CDCl<sub>3</sub>) for **2v**

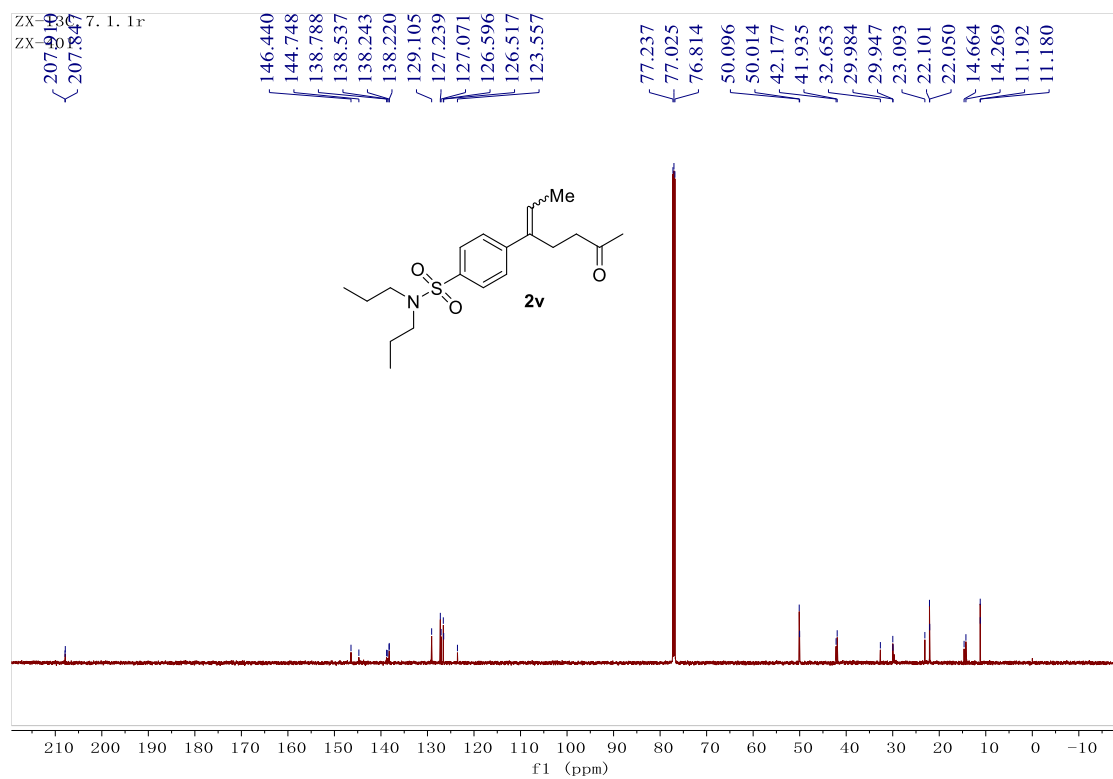

<sup>1</sup>H NMR (600 MHz, CDCl<sub>3</sub>) for **2w**

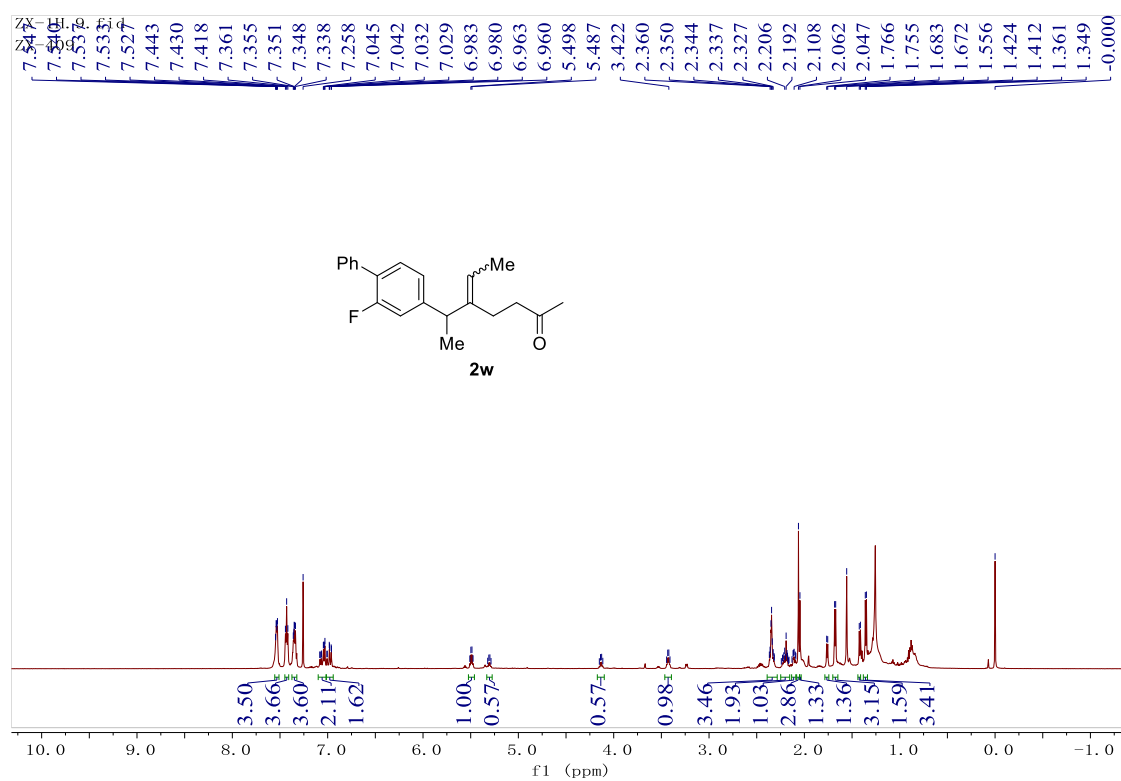

<sup>13</sup>C NMR (151 MHz, CDCl<sub>3</sub>) for **2w**

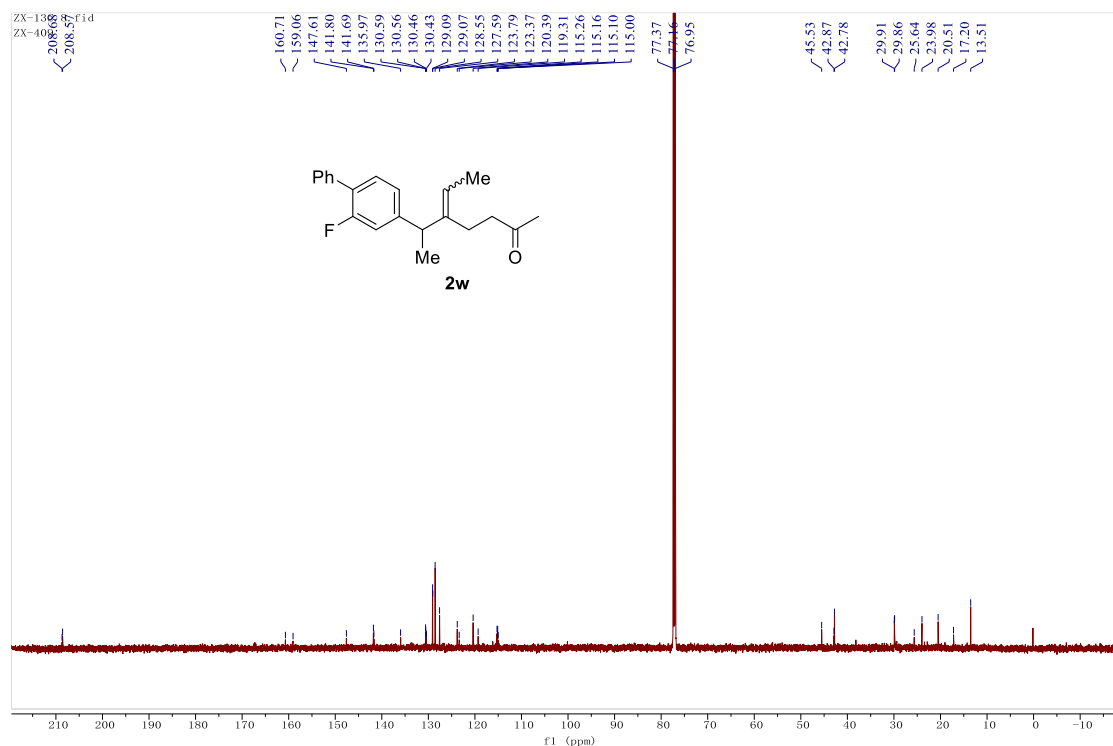

<sup>19</sup>F NMR (565 MHz, CDCl<sub>3</sub>) for **2w**

ZX-19F. 1. fid  
ZX-409

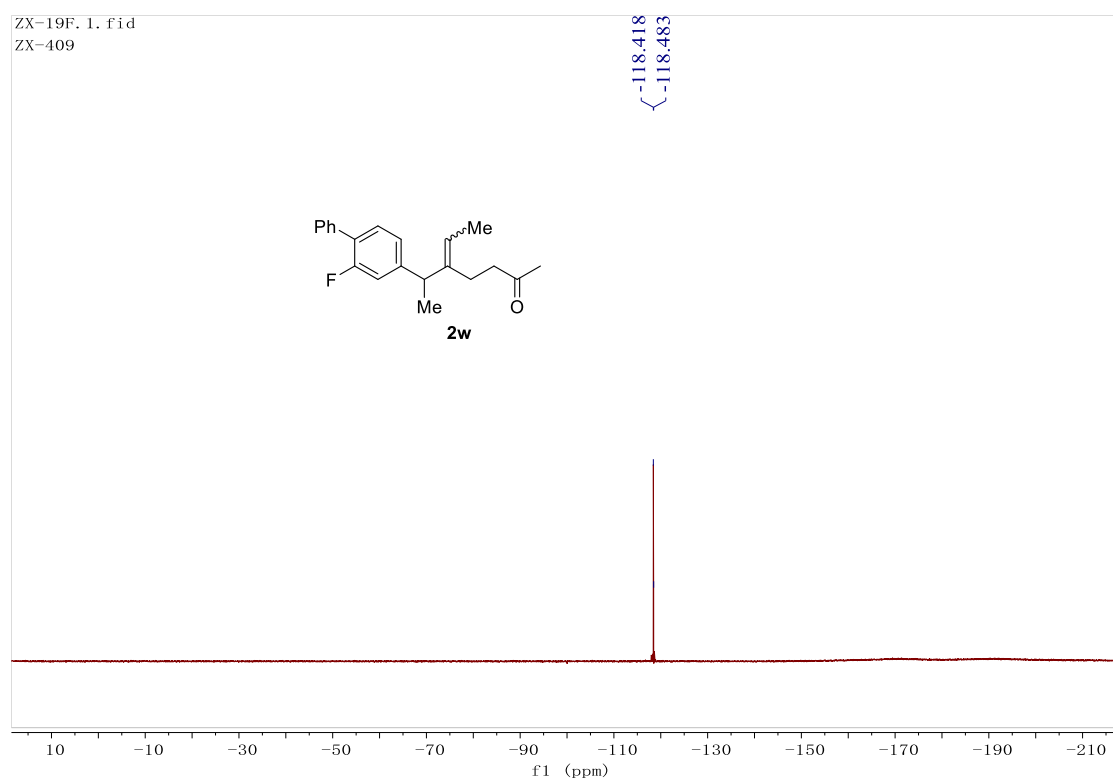

<sup>1</sup>H NMR (600 MHz, CDCl<sub>3</sub>) for **2x**

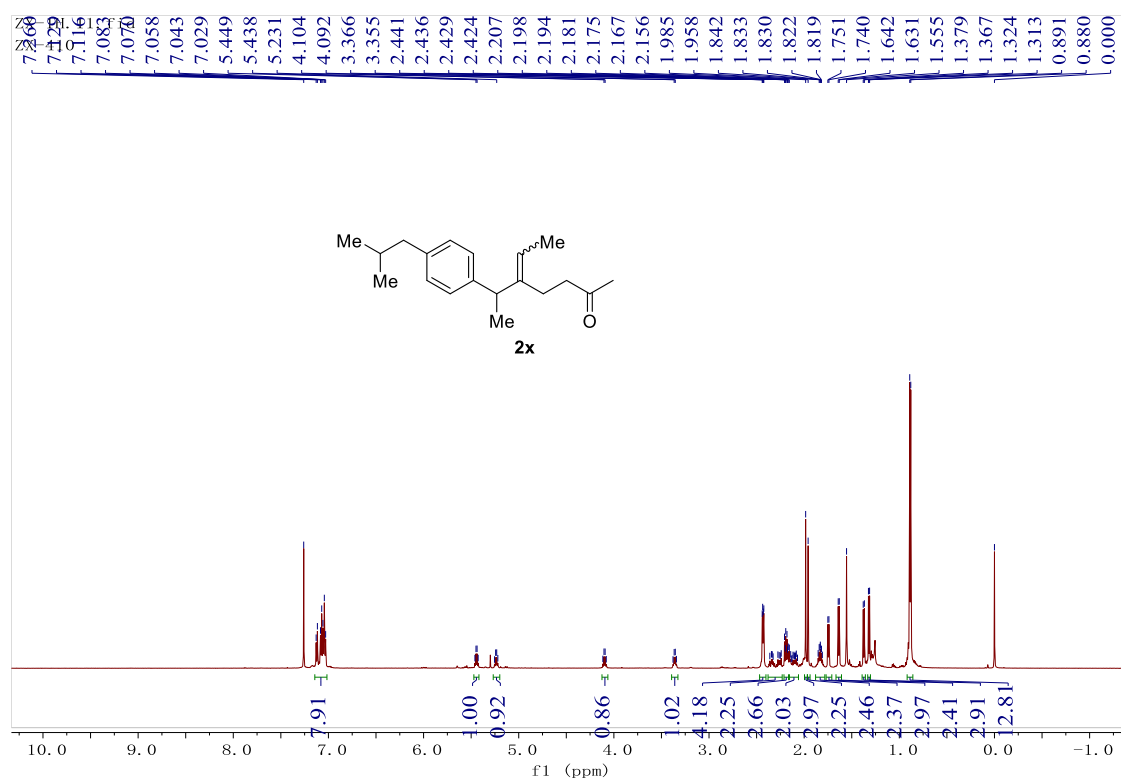

<sup>13</sup>C NMR (151 MHz, CDCl<sub>3</sub>) for **2x**

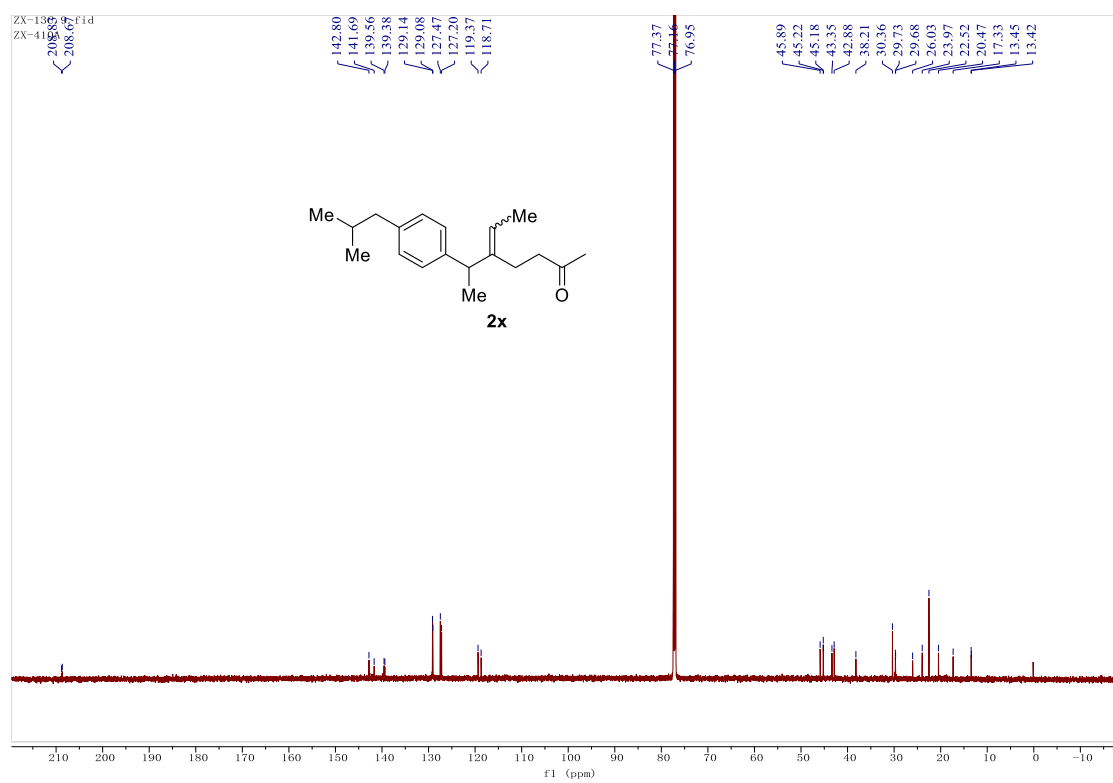

<sup>1</sup>H NMR (600 MHz, CDCl<sub>3</sub>) for **2y**

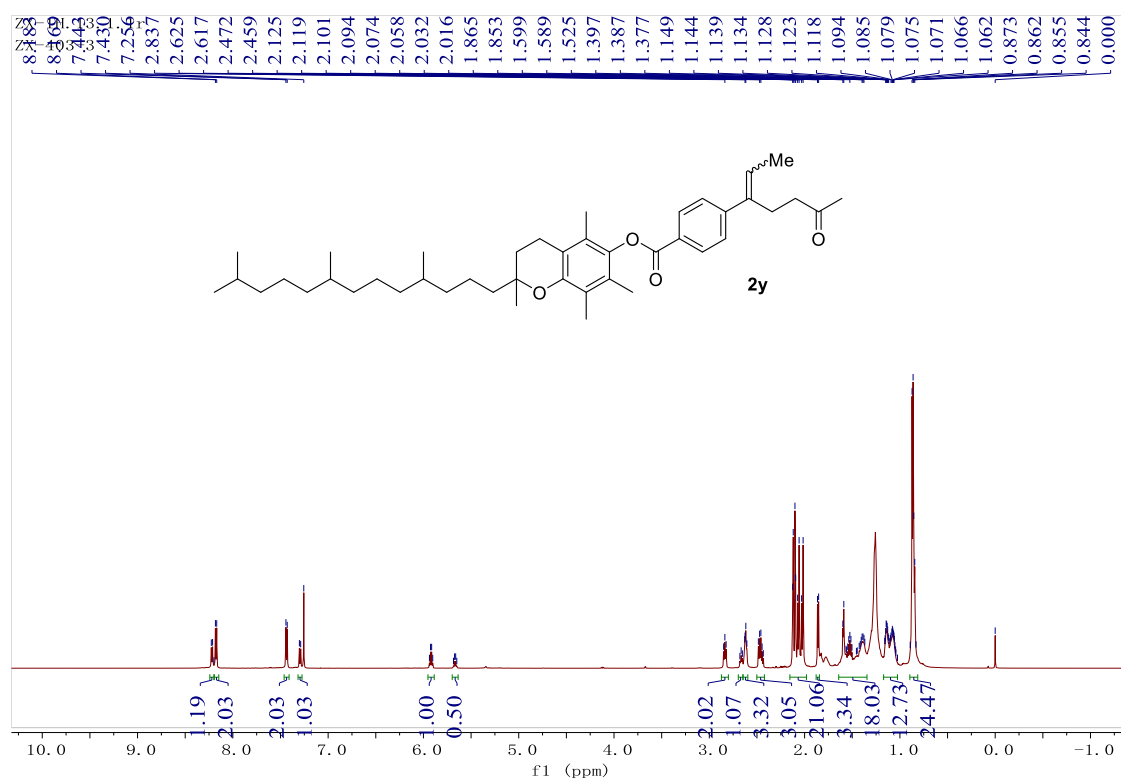

<sup>13</sup>C NMR (151 MHz, CDCl<sub>3</sub>) for **2y**

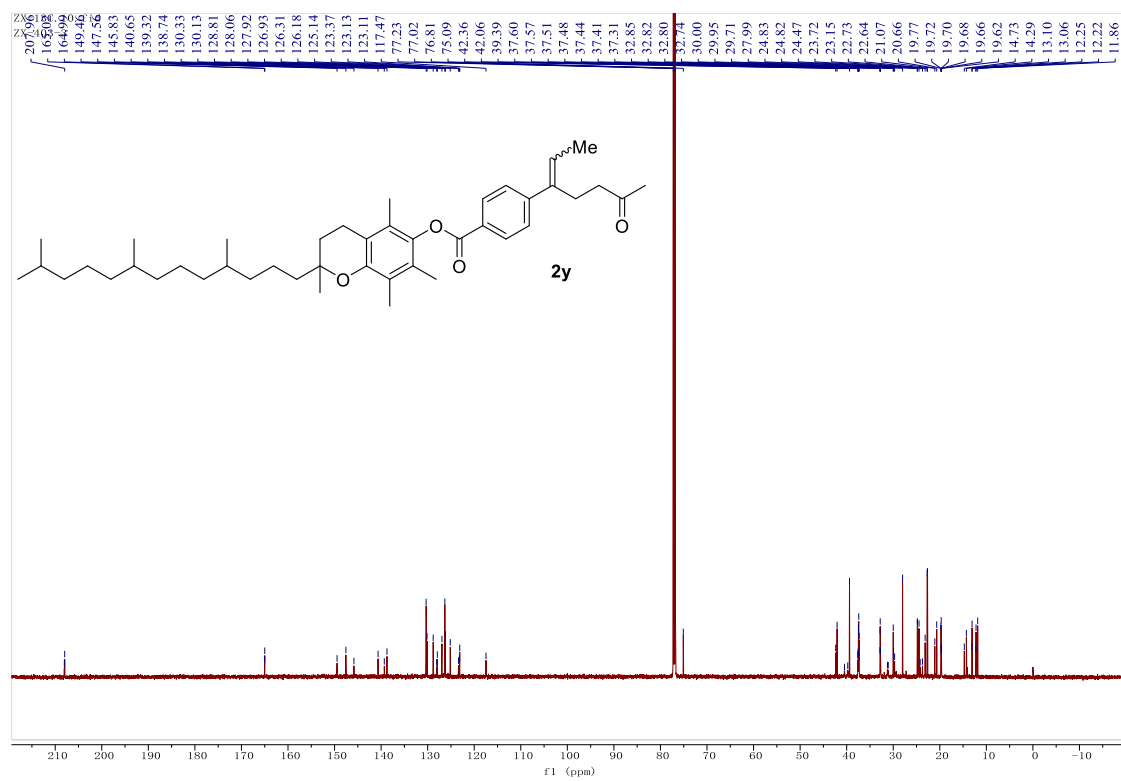

<sup>1</sup>H NMR (400 MHz, CDCl<sub>3</sub>) for **4a**

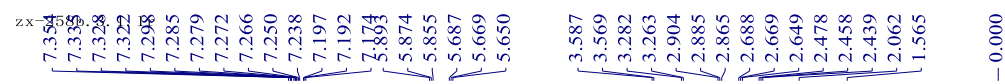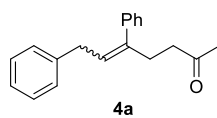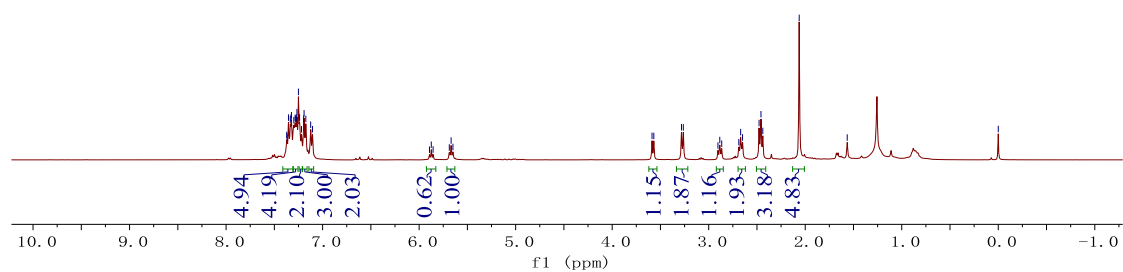

<sup>13</sup>C NMR (151 MHz, CDCl<sub>3</sub>) for **4a**

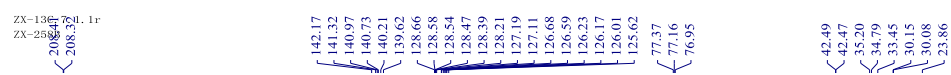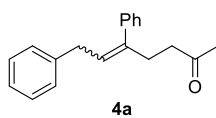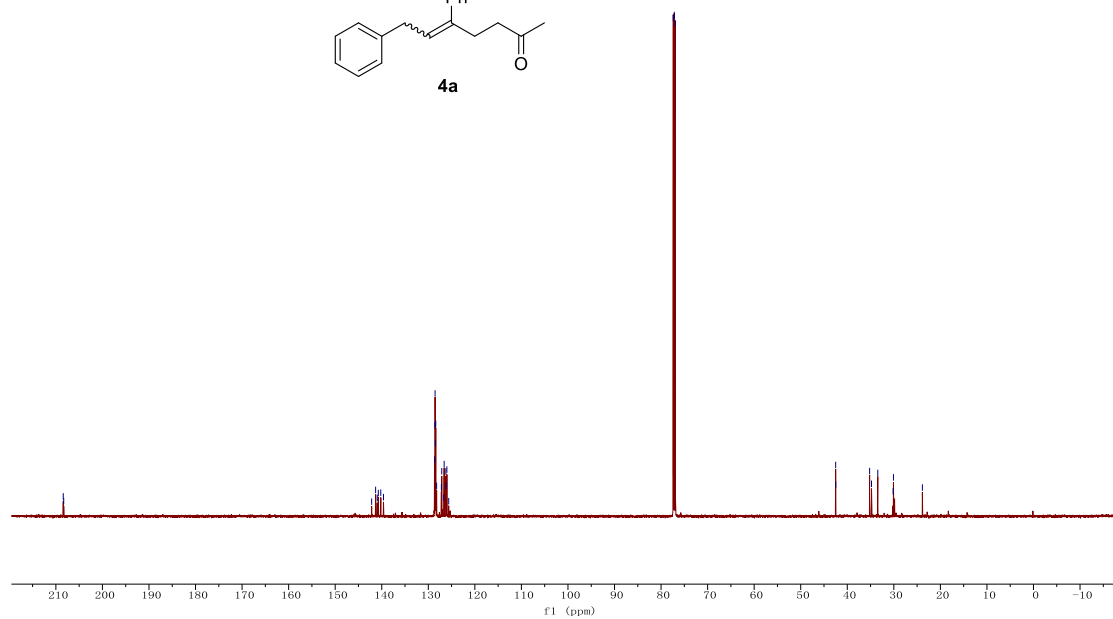

The *Z/E* configuration of **4a** was determined by 2D ( $^1\text{H}$ - $^1\text{H}$ ) NMR measurement as shown below.

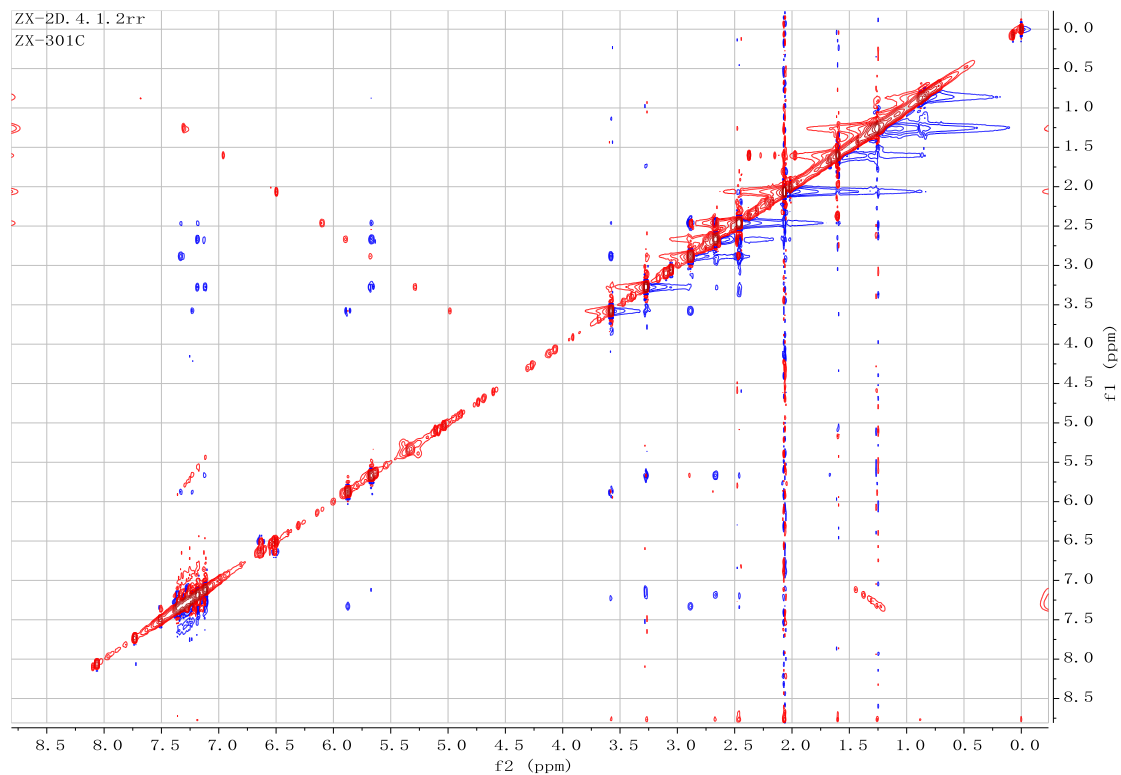



<sup>1</sup>H NMR (600 MHz, CDCl<sub>3</sub>) for **4b**

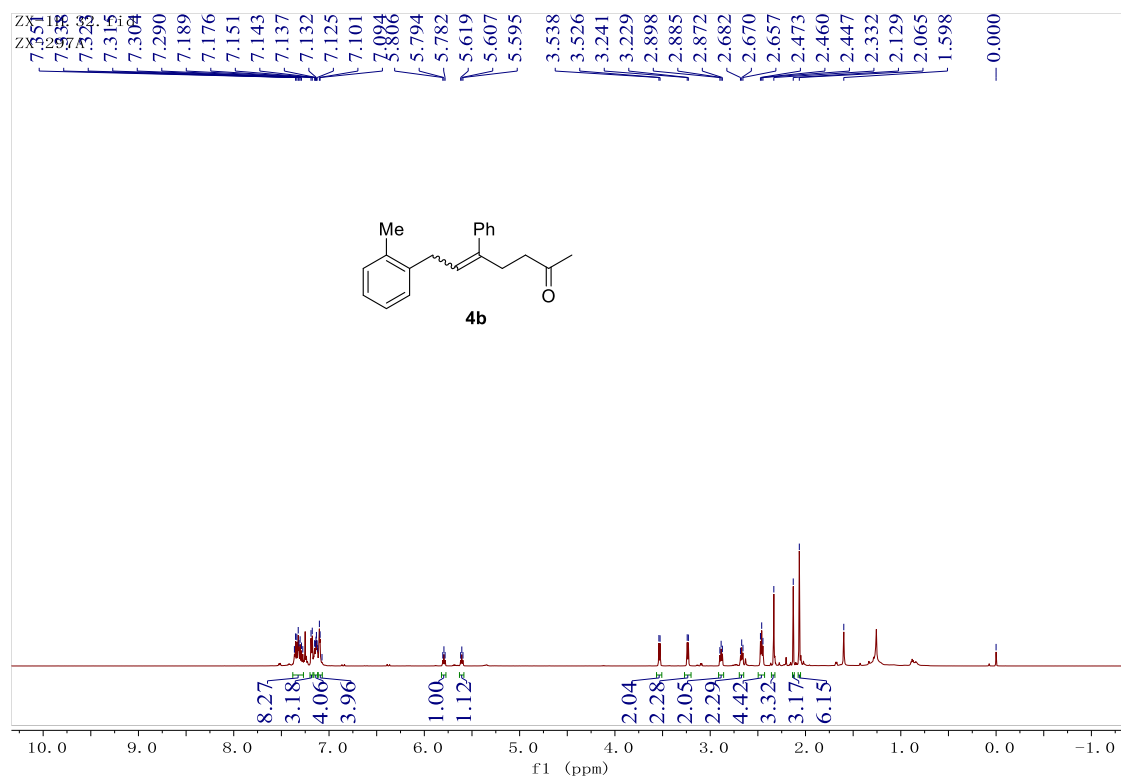

<sup>13</sup>C NMR (151 MHz, CDCl<sub>3</sub>) for **4b**

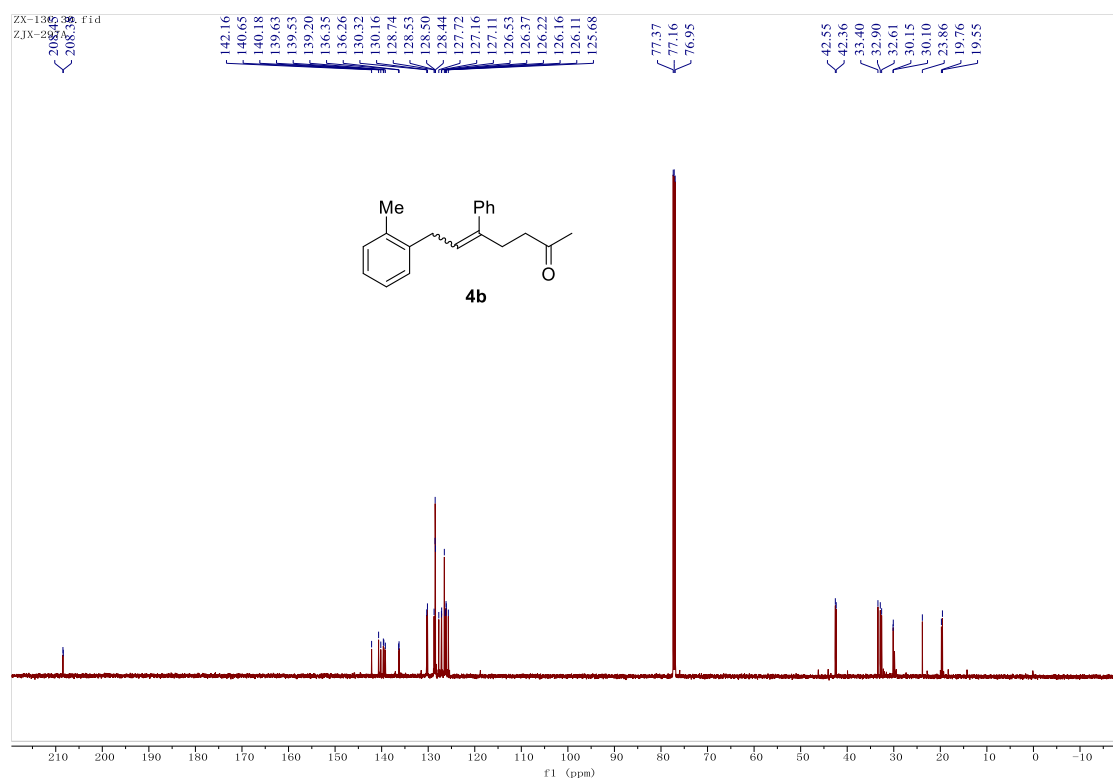

<sup>1</sup>H NMR (600 MHz, CDCl<sub>3</sub>) for **4c**

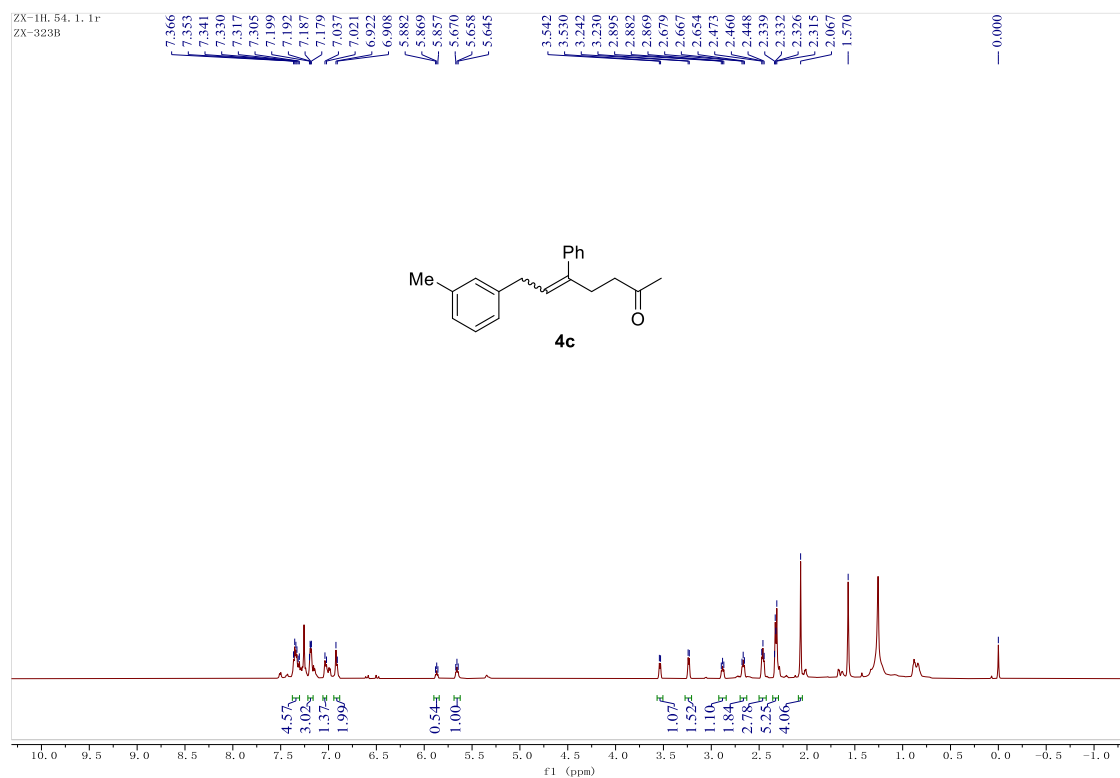

<sup>13</sup>C NMR (151 MHz, CDCl<sub>3</sub>) for **4c**

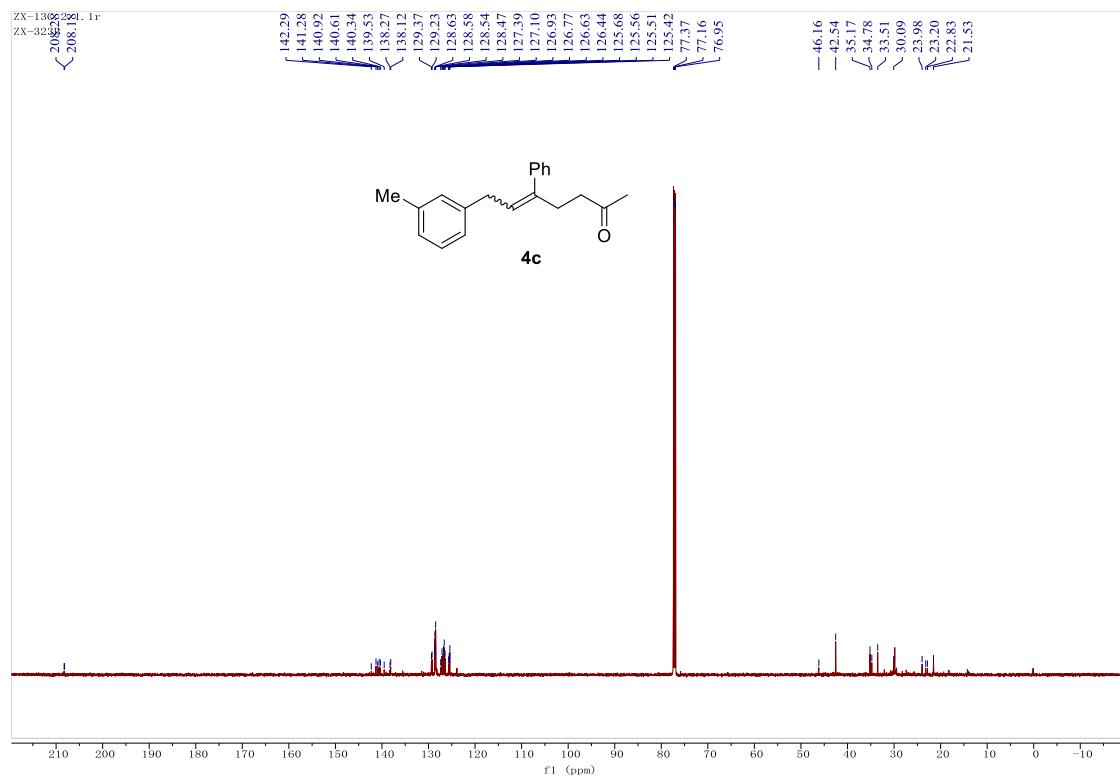

<sup>1</sup>H NMR (600 MHz, CDCl<sub>3</sub>) for **4d**

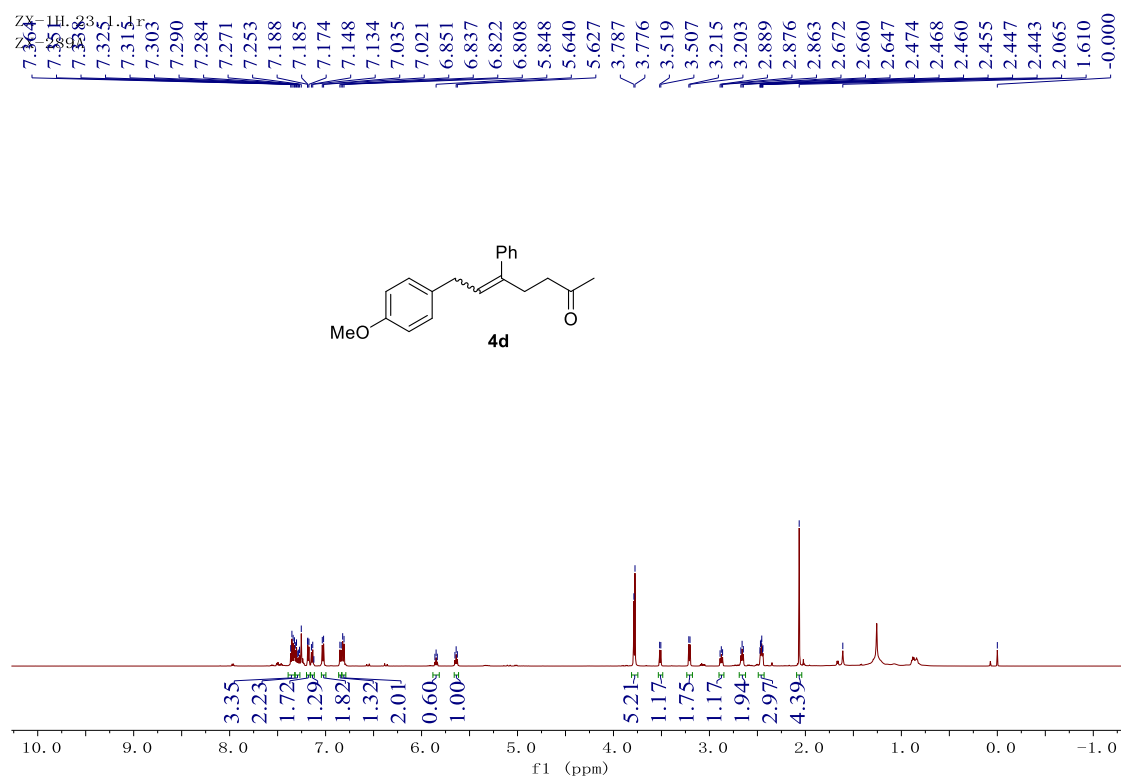

<sup>13</sup>C NMR (151 MHz, CDCl<sub>3</sub>) for **4d**

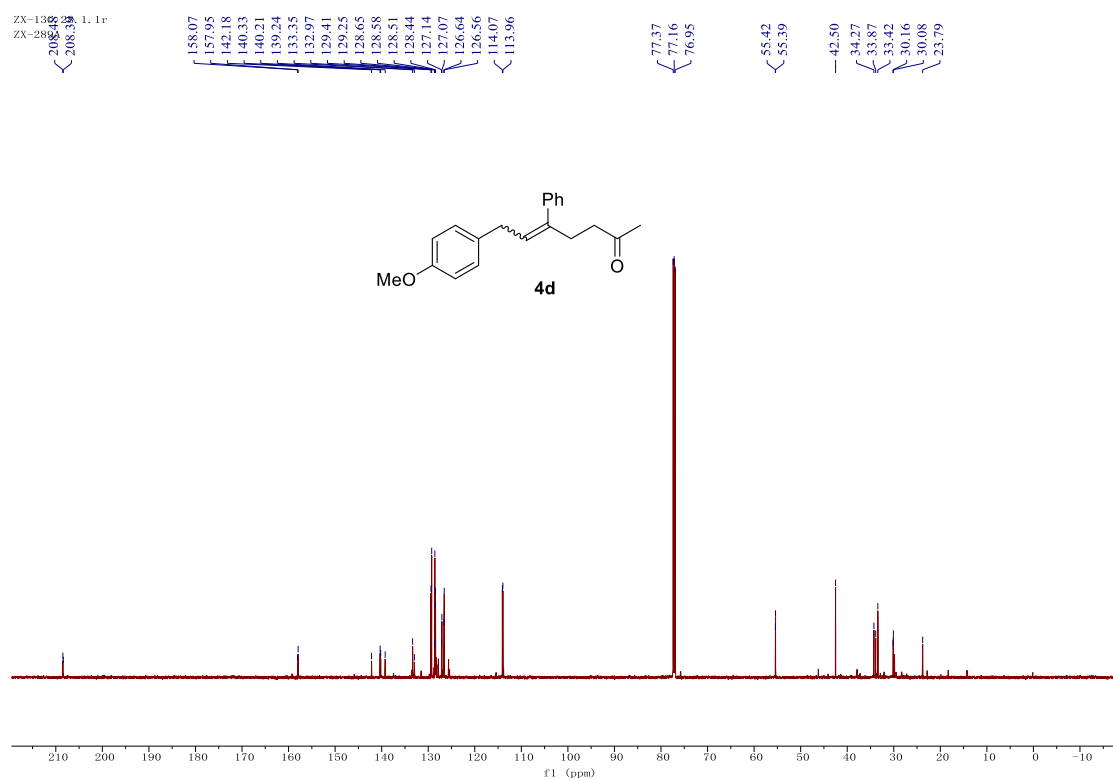

<sup>1</sup>H NMR (600 MHz, CDCl<sub>3</sub>) for **4e**

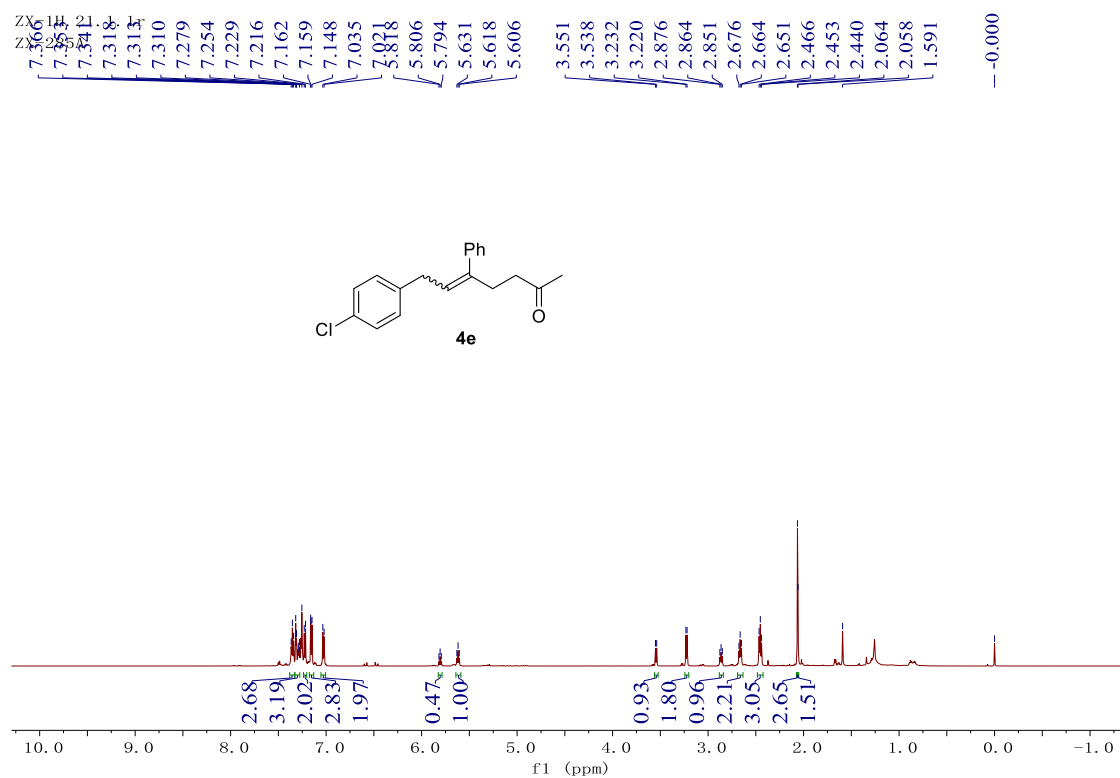

<sup>13</sup>C NMR (151 MHz, CDCl<sub>3</sub>) for **4e**

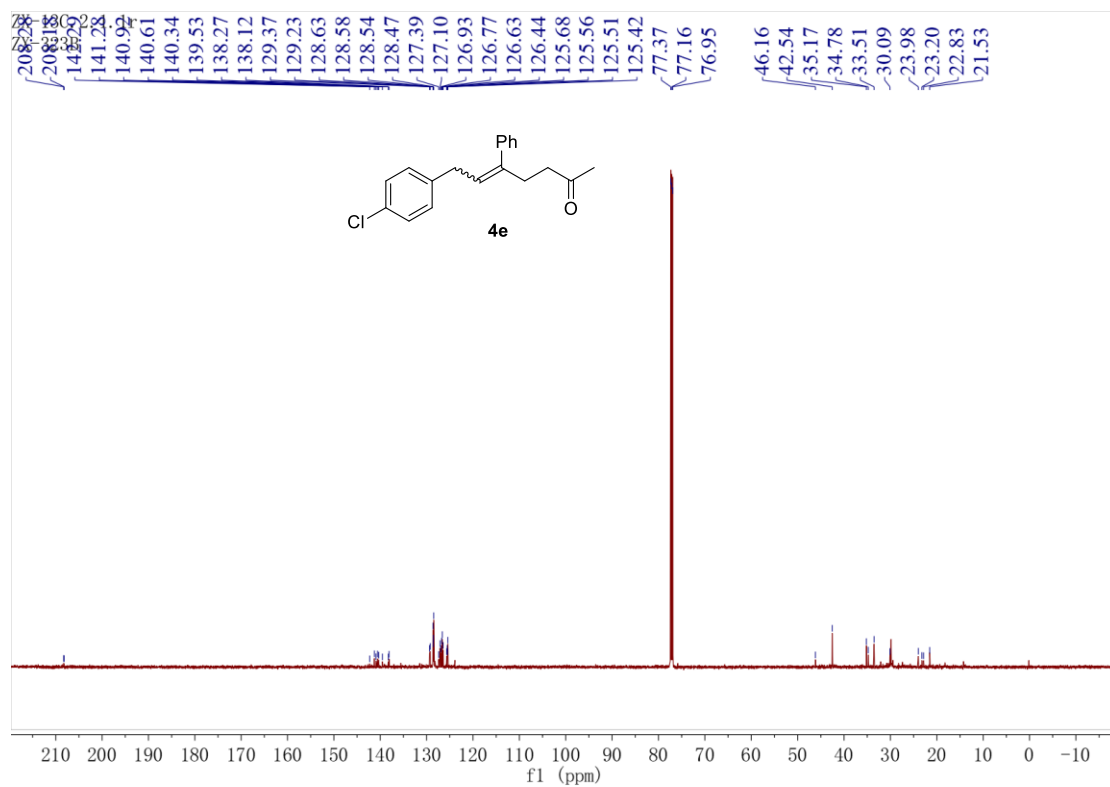

<sup>1</sup>H NMR (600 MHz, CDCl<sub>3</sub>) for **4f**

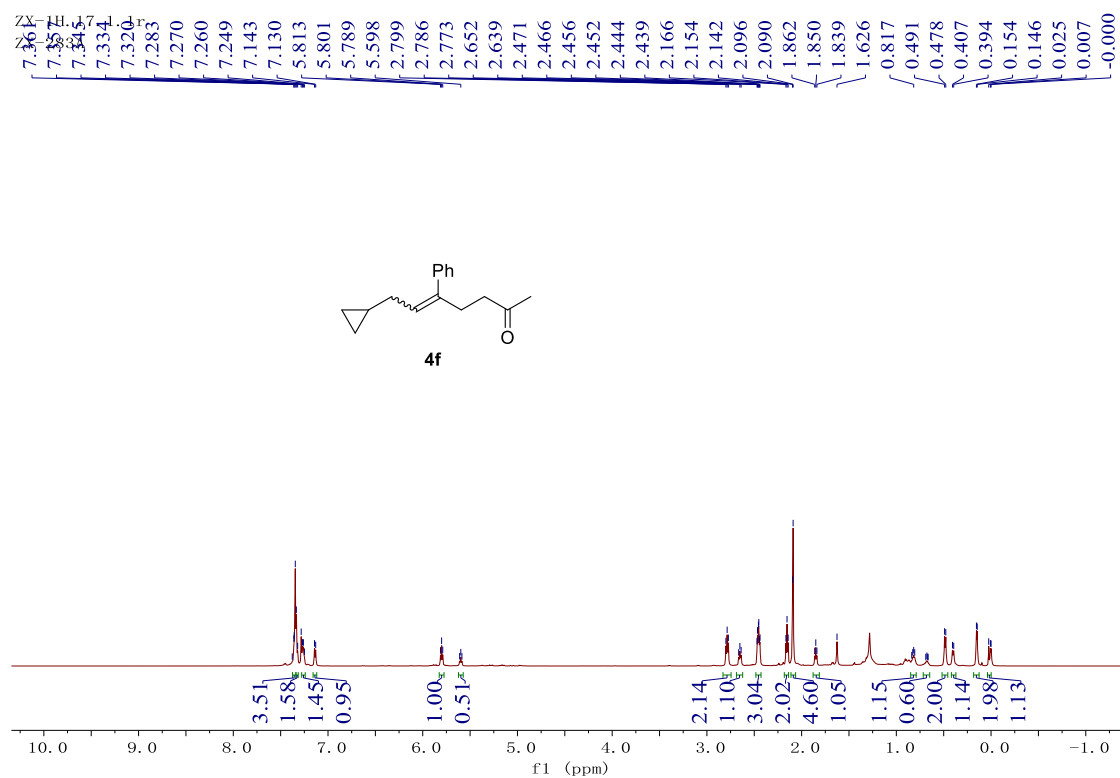

<sup>13</sup>C NMR (151 MHz, CDCl<sub>3</sub>) for **4f**

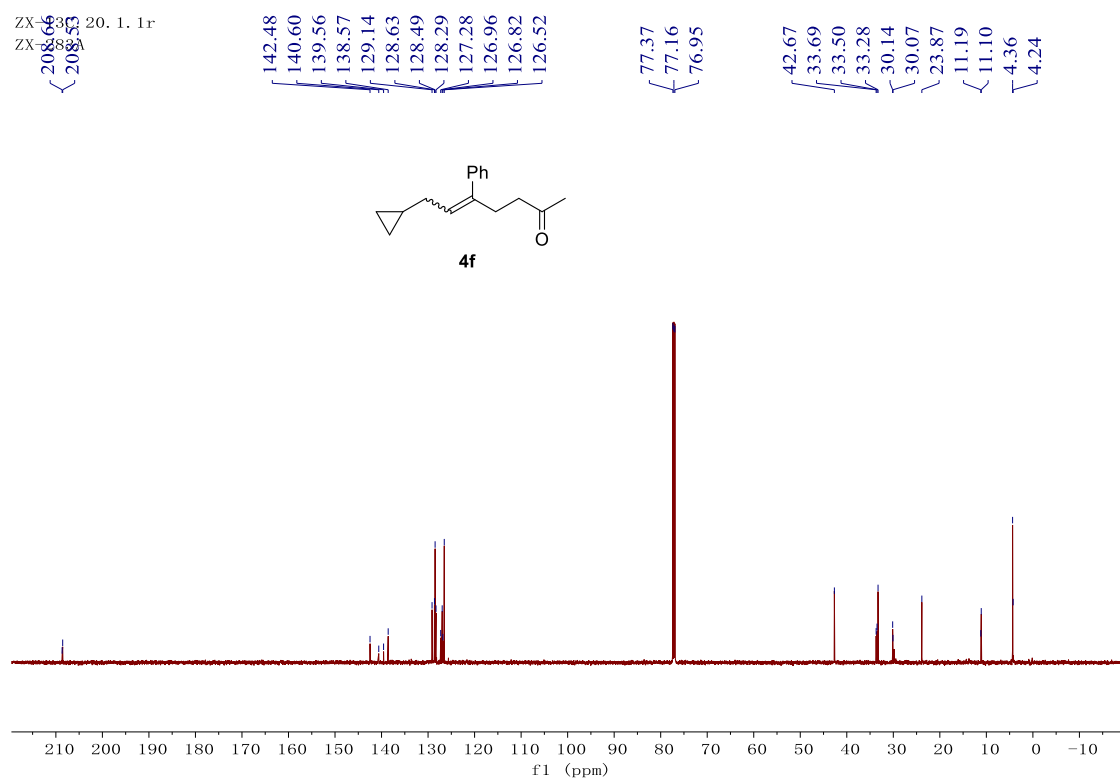

<sup>1</sup>H NMR (600 MHz, CDCl<sub>3</sub>) for **4g**

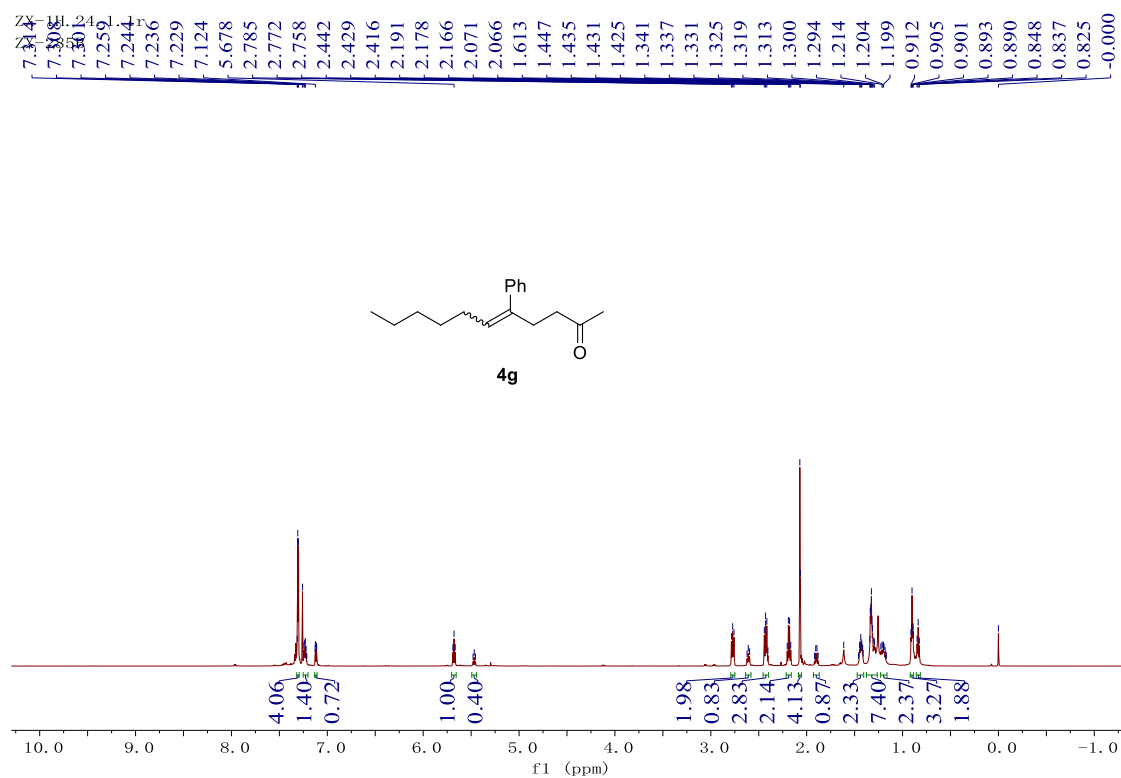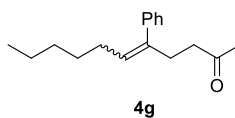

<sup>13</sup>C NMR (151 MHz, CDCl<sub>3</sub>) for **4g**

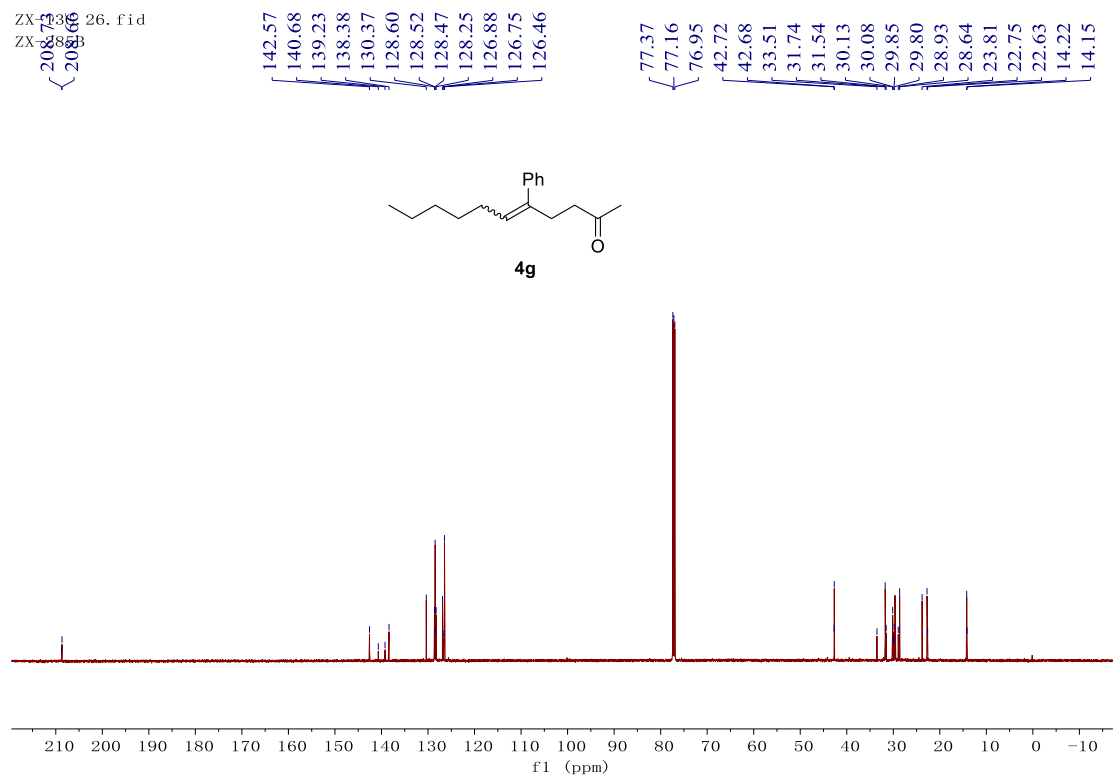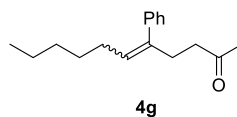

<sup>1</sup>H NMR (600 MHz, CDCl<sub>3</sub>) for **4h**

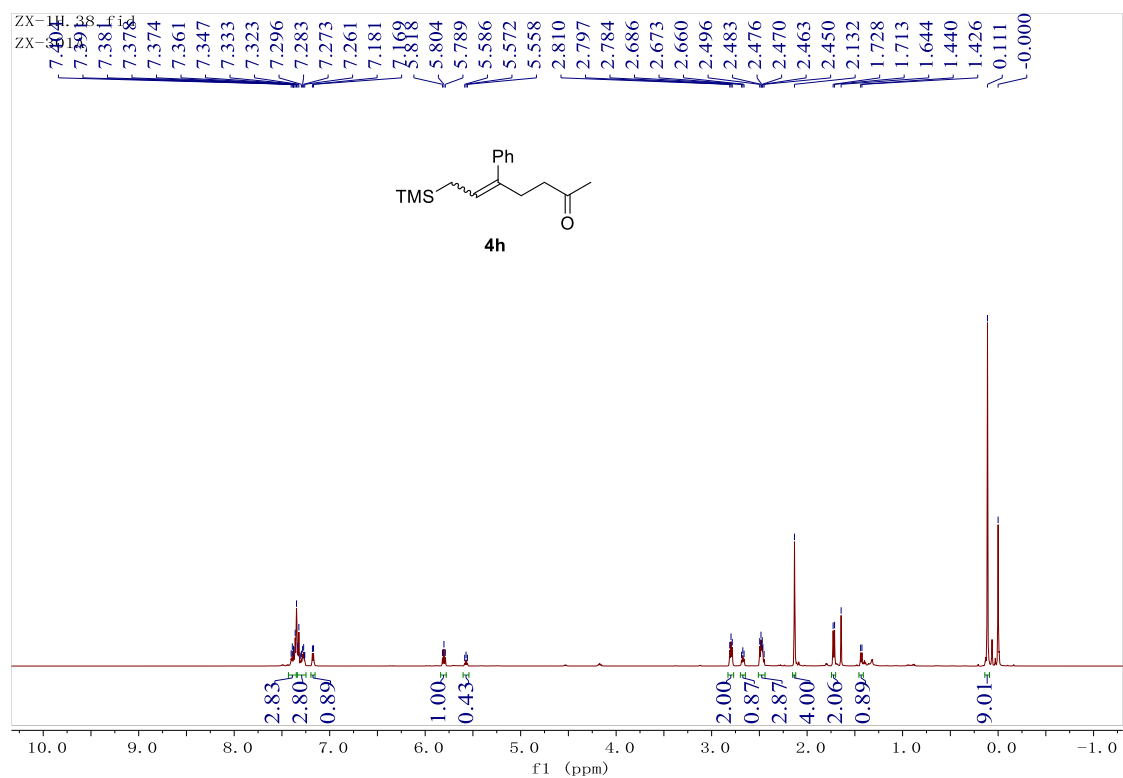

<sup>13</sup>C NMR (151 MHz, CDCl<sub>3</sub>) for **4h**

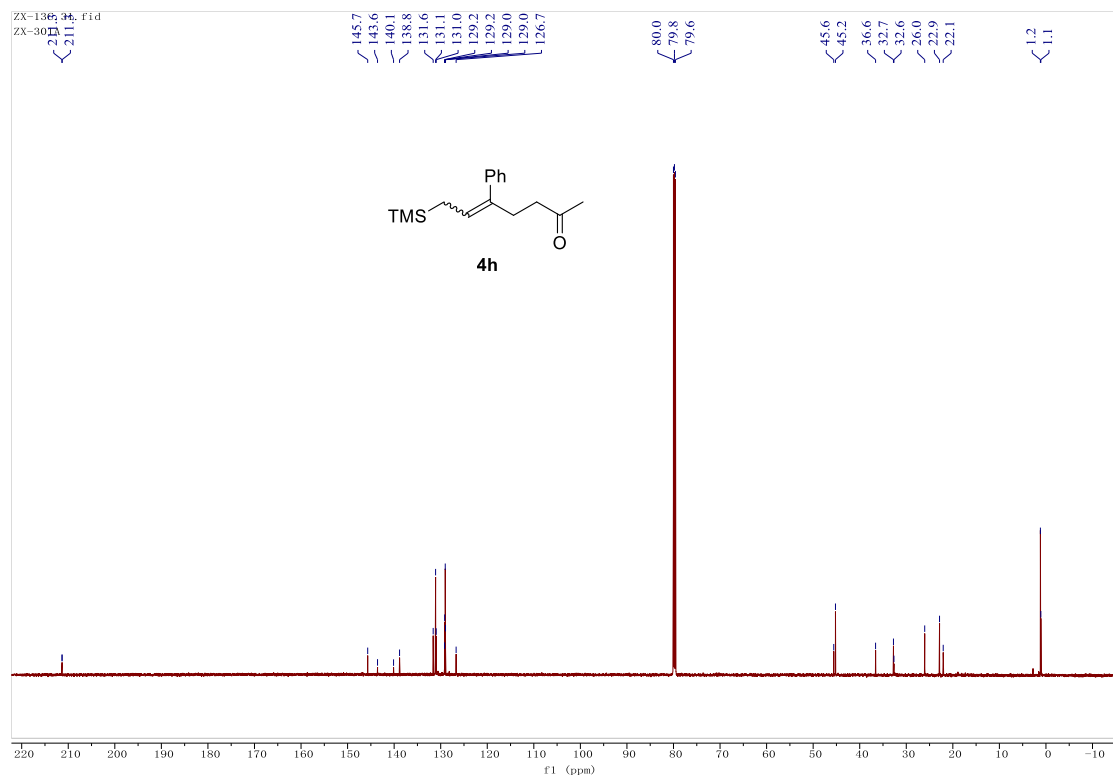

<sup>1</sup>H NMR (600 MHz, CDCl<sub>3</sub>) for **4i**

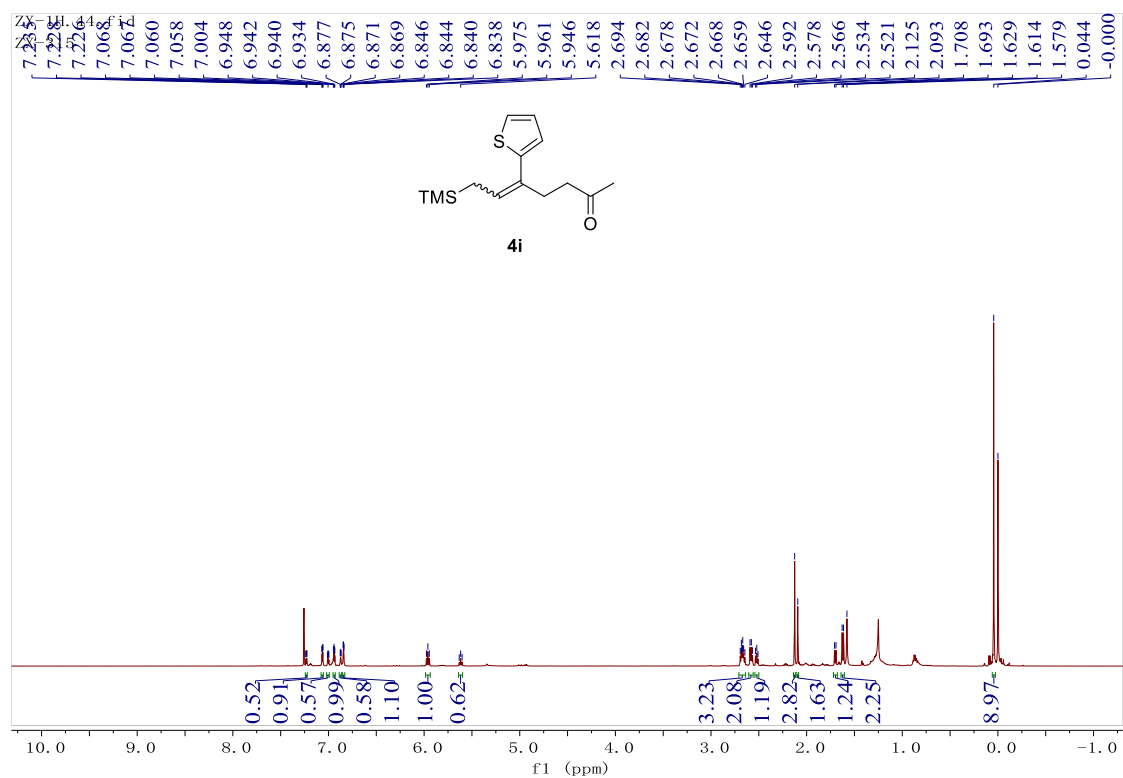

<sup>13</sup>C NMR (101 MHz, CDCl<sub>3</sub>) for **4i**

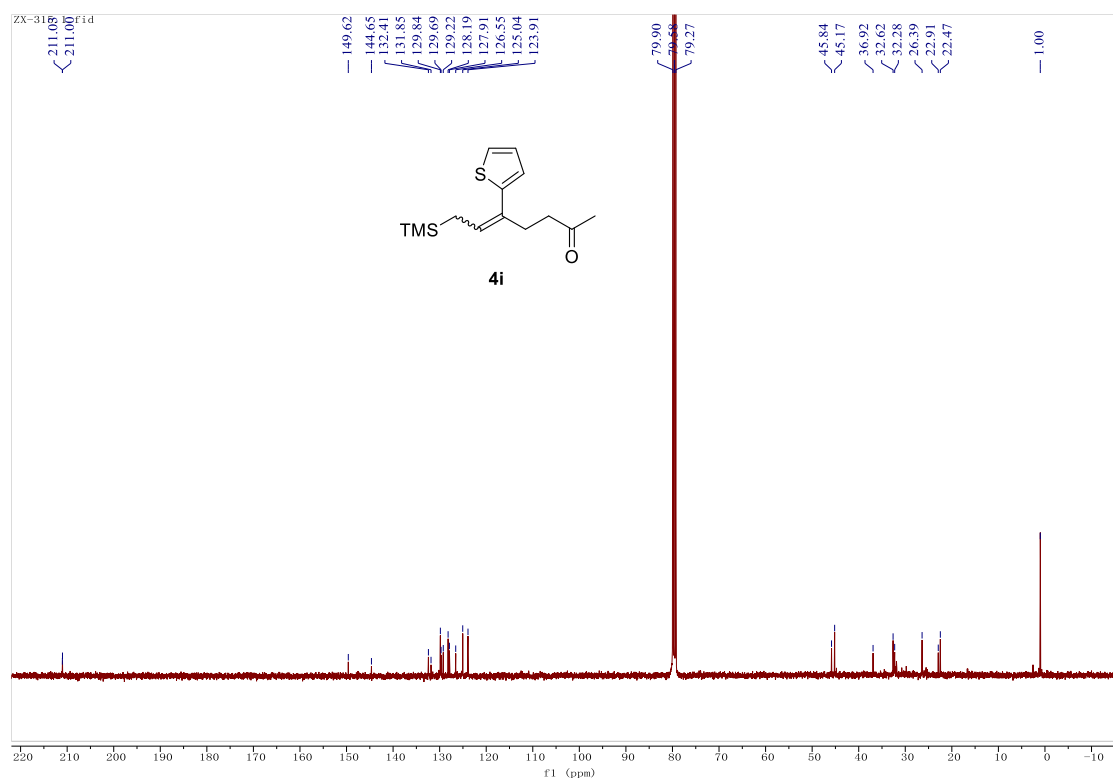



<sup>1</sup>H NMR (600 MHz, CDCl<sub>3</sub>) for **4j**

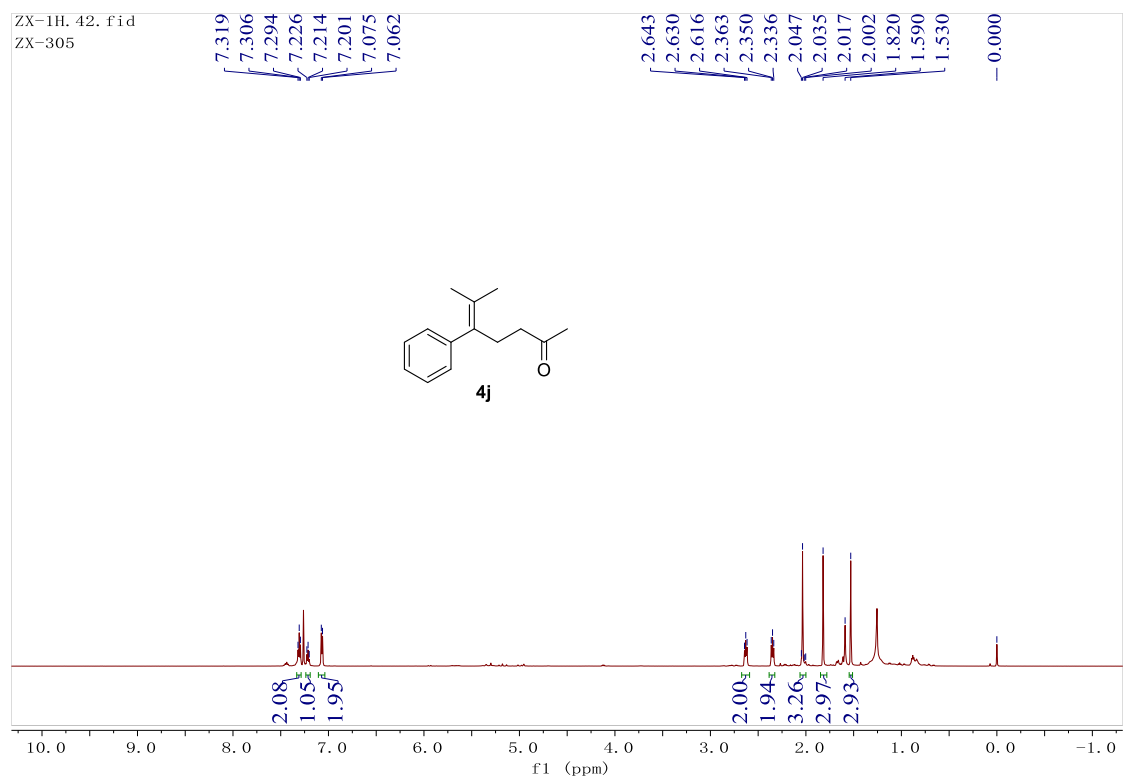

<sup>13</sup>C NMR (151 MHz, CDCl<sub>3</sub>) for **4j**

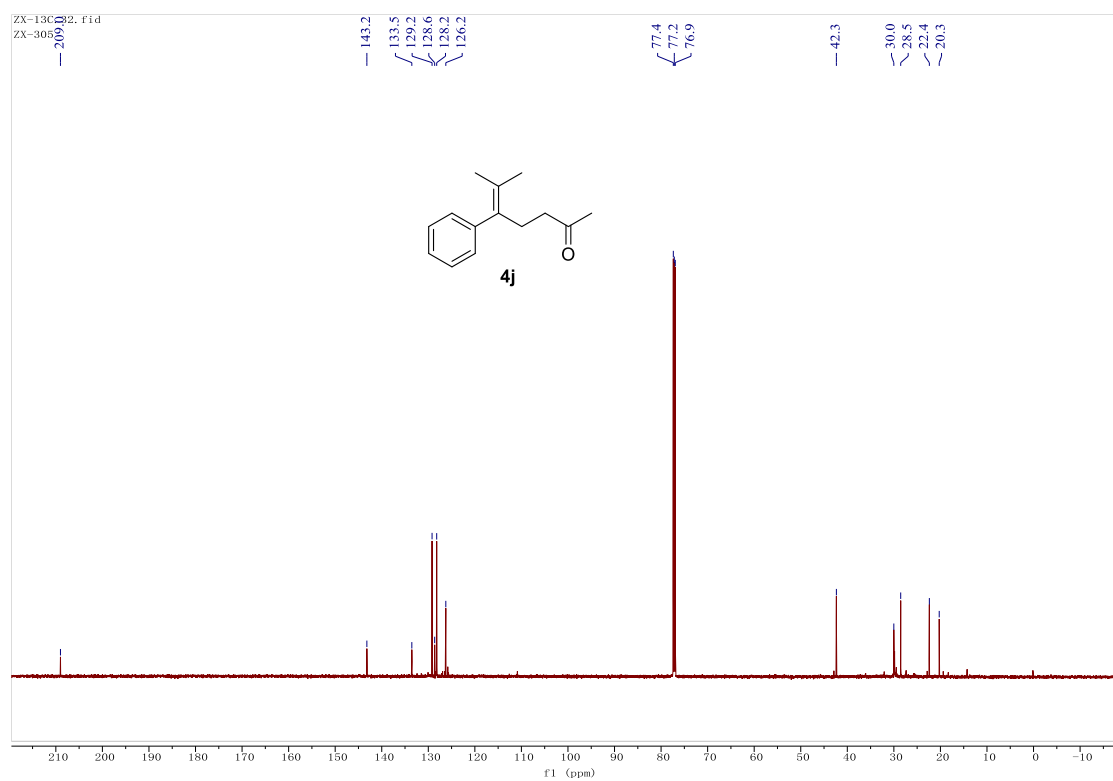

Supplement: d4qo01103a1.pdf [file d4qo01103a1.pdf]
